# Supplementary material for: Cobalt-catalyzed asymmetric addition of silylacetylenes to oxa- and azabenzonorbornadienes
Source: Royal Society of Chemistry journal article supplement (doi:10.1039/c2cc31880f), 2012-01-01
Supplement: c2cc31880f.pdf [file c2cc31880f.pdf]

## Supplementary Information

### Cobalt-catalyzed asymmetric addition of silylacetylenes to oxa- and azabenzonorbornadienes

Takahiro Sawano, Keiyu Ou, Takahiro Nishimura\* and Tamio Hayashi\*

*Department of Chemistry, Graduate School of Science*

*Kyoto University, Sakyo, Kyoto 606-8502, Japan*

E-mail: tnishi@kuchem.kyoto-u.ac.jp; thayashi@kuchem.kyoto-u.ac.jp

#### Contents of Supplementary Information:

|                                                                                                                |           |
|----------------------------------------------------------------------------------------------------------------|-----------|
| 1. General                                                                                                     | S-2       |
| 2. Materials                                                                                                   | S-2       |
| 3. A typical procedure for Table 2                                                                             | S-2~S-3   |
| 4. Characterization of the products                                                                            | S-3~S-8   |
| 5. Deuterium labeling experiments                                                                              | S-8~S-9   |
| 6. Transformation of <b>3em</b> into <b>6</b> and the data for<br>X-ray crystal structure of compound <b>6</b> | S-9~S-11  |
| 7. <sup>1</sup> H, <sup>13</sup> C NMR spectra, and chiral HPLC charts                                         | S-12~S-54 |

## 1. General

All anaerobic and moisture-sensitive manipulations were carried out with standard Schlenk techniques under predried nitrogen. NMR spectra were recorded on a JEOL JNM LA-500 spectrometer (500 MHz for  $^1\text{H}$ , 125 MHz for  $^{13}\text{C}$ ). Chemical shifts are reported in  $\delta$  (ppm) referenced to the residual peaks of  $\text{CDCl}_3$  ( $\delta$  7.26) or  $\text{DMSO}-d_6$  ( $\delta$  2.49) for  $^1\text{H}$  NMR and  $\text{CDCl}_3$  ( $\delta$  77.00) or  $\text{DMSO}-d_6$  ( $\delta$  39.52) for  $^{13}\text{C}$  NMR. The following abbreviations are used; s: singlet, d: doublet, t: triplet, q: quartet, m: multiplet. Optical rotations were measured on a JASCO P-2200 polarimeter. High-resolution mass spectra were obtained with a Bruker micrOTOF spectrometer.

## 2. Materials

DMSO was distilled over  $\text{CaH}_2$  under  $\text{N}_2$ .  $\text{Co}(\text{OAc})_2 \cdot 4\text{H}_2\text{O}$  (99.0%, Kanto Chemicals) and zinc powder (99.9%, 75~150  $\mu\text{m}$ , Wako Chemicals) were used as received.  $\text{Co}(\text{OAc})_2$  (KISHIDA chemicals) was dried under reduced pressure before use. Alumina (activated 200) for column chromatography was purchased from Nacalai Tesque. Oxabenzonorbornadiene **1a** [573-57-9], **1b** [19061-36-0], **1c** [173276-99-8], **1d** [106750-88-3], **1e** [115695-65-3], **1f** [26002-73-3], **1g** [648921-68-0], and **1h** [885691-68-9] were prepared according to the reported procedures.<sup>1</sup> All other chemicals were purchased from commercial suppliers and used as received.

## 3. A typical procedure for cobalt-catalyzed asymmetric addition of terminal alkynes to oxabenzonorbornadienes (Table 2)

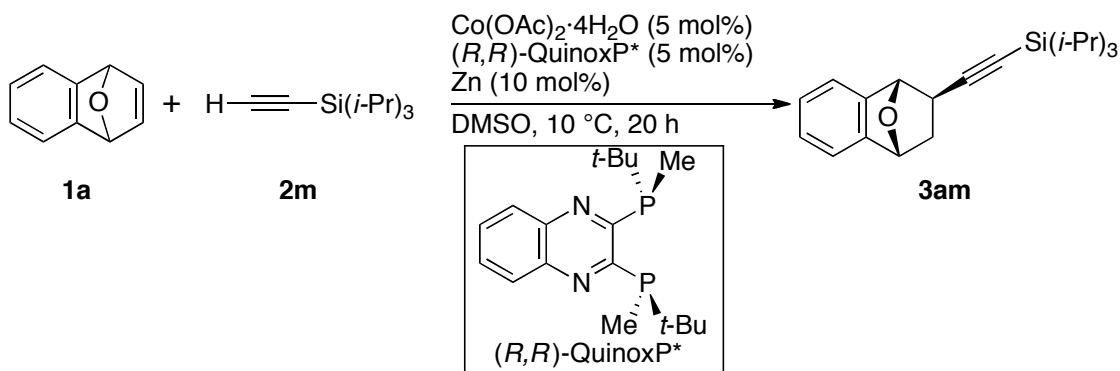

A mixture of  $\text{Co}(\text{OAc})_2 \cdot 4\text{H}_2\text{O}$  (2.5 mg, 0.010 mmol),  $(R,R)$ -QuinoxP\* (3.3 mg, 0.010 mmol), and Zn powder (1.3 mg, 0.020 mmol) in DMSO (0.3 mL) was stirred at room temperature for 15 min. The mixture was cooled to 10 °C, and oxabenzonorbornadiene **1a** (28.8 mg, 0.200 mmol) and (triisopropylsilyl)acetylene **2m** (90  $\mu\text{L}$ , 0.40 mmol) were added. The mixture was stirred at 10 °C for 20 h, and then it was passed through a short column of alumina with diethyl ether as eluent.

1 a) M. Davoust, J. A. Kitching, M. J. Fleming and M. Lautens, *Chem. Eur. J.*, 2010, **16**, 50. b) M. Lautens, K. Fagnou and D. Yang, *J. Am. Chem. Soc.*, 2003, **125**, 14884. c) Y.-H. Cho, V. Zunic, H. Senboku, M. Olsen and M. Lautens, *J. Am. Chem. Soc.*, 2006, **128**, 6837.

After removal of the solvent on a rotary evaporator, the residue was subjected to preparative TLC (silica gel, hexane/ethyl acetate = 10/1) to give compound **3am** (59.5 mg, 0.182 mmol, 91%).

The absolute configuration of **3em** produced by (*R,R*)-QuinoxP\* was determined to be (1*S*,2*R*,4*R*) by X-ray analysis of **4**, which was derived from **3em** (vide infra). For others, they were assigned by analogy with (1*S*,2*R*,4*R*)-**3em**.

#### 4. Characterization of the products

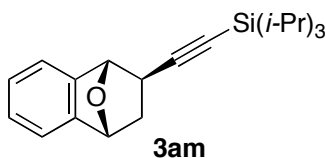

**Compound 3am** (91% yield, 99% ee (1*S*,2*R*,4*R*)). The ee was measured by HPLC (Chiralcel OD-H column, flow 0.5 mL/min, hexane/2-propanol = 500/1, 254 nm,  $t_1$  = 13.3 min (minor),  $t_2$  = 22.0 min (major));  $[\alpha]_D^{20}$  +72 ( $c$  0.63, CHCl<sub>3</sub>) for 99% ee. <sup>1</sup>H NMR (CDCl<sub>3</sub>)  $\delta$  1.03–1.13 (m, 21H), 1.88 (dd,  $J$  = 11.4, 8.4 Hz, 1H), 2.15 (dt,  $J$  = 11.4, 4.6 Hz, 1H), 2.55 (dd,  $J$  = 8.4, 4.6 Hz, 1H), 5.36 (s, 1H), 5.47 (d,  $J$  = 4.6 Hz, 1H), 7.13–7.19 (m, 2H), 7.20–7.24 (m, 1H), 7.25–7.30 (m, 1H); <sup>13</sup>C NMR (CDCl<sub>3</sub>)  $\delta$  11.3, 18.7, 32.7, 37.1, 79.1, 81.1, 84.7, 111.0, 119.0, 119.1, 126.7, 127.0, 144.6, 145.3. HRMS (ESI) calcd for C<sub>21</sub>H<sub>30</sub>NaOSi (M+Na)<sup>+</sup> 349.1958, found 349.1953.

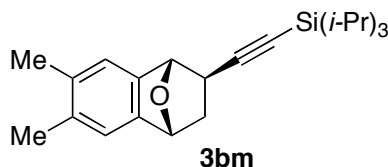

**Compound 3bm** (82% yield, 99% ee (1*S*,2*R*,4*R*)). The ee was measured by HPLC (Chiralcel OD-H column, flow 0.5 mL/min, hexane/2-propanol = 500/1, 254 nm,  $t_1$  = 18.3 min (major),  $t_2$  = 26.1 min (minor));  $[\alpha]_D^{20}$  +78 ( $c$  0.62, CHCl<sub>3</sub>) for 99% ee. <sup>1</sup>H NMR (CDCl<sub>3</sub>)  $\delta$  1.04–1.12 (m, 21H), 1.84 (dd,  $J$  = 11.4, 8.4 Hz, 1H), 2.12 (dt,  $J$  = 11.4, 4.5 Hz, 1H), 2.24 (s, 6H), 2.55 (dd,  $J$  = 8.4, 4.5 Hz, 1H), 5.30 (s, 1H), 5.41 (d,  $J$  = 4.5 Hz, 1H), 7.01 (s, 1H), 7.05 (s, 1H); <sup>13</sup>C NMR (CDCl<sub>3</sub>)  $\delta$  11.3, 18.7, 19.89, 19.90, 33.0, 37.5, 79.0, 80.8, 84.6, 111.4, 120.4, 120.5, 134.7, 135.0, 142.5, 143.2. HRMS (ESI) calcd for C<sub>23</sub>H<sub>34</sub>NaOSi (M+Na)<sup>+</sup> 377.2271, found 377.2265.

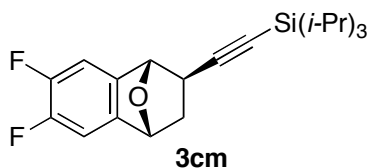

**Compound 3cm** (86% yield, 90% ee (1*S*,2*R*,4*R*)). The ee was measured by HPLC (Chiralcel OD-H column×2, flow 0.5 mL/min, hexane/2-propanol = 100/1, 254 nm,  $t_1$  = 17.7 min (major),  $t_2$  =

19.6 min (minor));  $[\alpha]_D^{20} +62$  (*c* 0.77, CHCl<sub>3</sub>) for 90% ee. <sup>1</sup>H NMR (CDCl<sub>3</sub>) δ 1.02–1.12 (m, 21H), 1.85 (dd, *J* = 11.6, 8.5 Hz, 1H), 2.14 (dt, *J* = 11.6, 4.5 Hz, 1H), 2.52 (dd, *J* = 8.5, 4.5 Hz, 1H), 5.32 (s, 1H), 5.44 (d, *J* = 4.5 Hz, 1H), 7.05 (dd, *J*<sub>F-H</sub> = 8.9, 6.7 Hz, 1H), 7.10 (dd, *J*<sub>F-H</sub> = 9.0, 6.9 Hz, 1H); <sup>13</sup>C NMR (CDCl<sub>3</sub>) δ 11.2, 18.6, 32.6, 36.9, 78.9 (d, *J*<sub>F-C</sub> = 2 Hz), 81.8, 84.4 (d, *J*<sub>F-C</sub> = 2 Hz), 109.1 (d, *J*<sub>F-C</sub> = 15 Hz), 109.3 (d, *J*<sub>F-C</sub> = 14 Hz), 110.0, 140.5 (dd, *J*<sub>F-C</sub> = 6, 4 Hz), 141.2 (dd, *J*<sub>F-C</sub> = 6, 3 Hz), 149.2 (dd, *J*<sub>F-C</sub> = 247, 13 Hz), 149.4 (dd, *J*<sub>F-C</sub> = 246, 12 Hz). HRMS (ESI) calcd for C<sub>21</sub>H<sub>28</sub>F<sub>2</sub>NaOSi (M+Na)<sup>+</sup> 385.1770, found 385.1763.

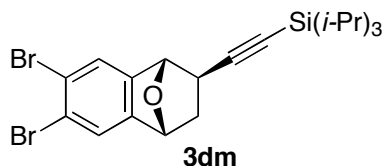

**Compound 3dm** (81% yield, 94% ee (1*S*,2*R*,4*R*)). The ee was measured by HPLC (Chiralcel OD-H column×2, flow 0.5 mL/min, hexane/2-propanol = 100/1, 254 nm, *t*<sub>1</sub> = 19.2 min (major), *t*<sub>2</sub> = 25.8 min (minor));  $[\alpha]_D^{20} +69$  (*c* 0.72, CHCl<sub>3</sub>) for 94% ee. <sup>1</sup>H NMR (CDCl<sub>3</sub>) δ 1.02–1.11 (m, 21H), 1.87 (dd, *J* = 11.8, 8.4 Hz, 1H), 2.15 (dt, *J* = 11.8, 4.7 Hz, 1H), 2.55 (dd, *J* = 8.4, 4.7 Hz, 1H), 5.31 (s, 1H), 5.42 (d, *J* = 4.7 Hz, 1H), 7.49 (s, 1H), 7.54 (s, 1H); <sup>13</sup>C NMR (CDCl<sub>3</sub>) δ 11.2, 18.6, 32.5, 36.7, 78.6, 82.0, 84.1, 109.8, 122.7, 123.0, 124.6, 124.7, 145.6, 146.3. HRMS (ESI) calcd for C<sub>21</sub>H<sub>28</sub>Br<sub>2</sub>NaOSi (M+Na)<sup>+</sup> 505.0168, found 505.0165.

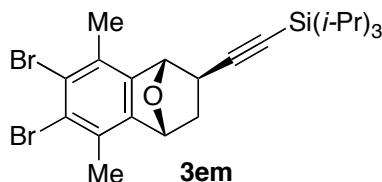

**Compound 3em** (70% yield, 95% ee (1*S*,2*R*,4*R*)). The ee was measured by HPLC (Chiralcel OD-H column×2, flow 0.5 mL/min, hexane/2-propanol = 100/1, 254 nm, *t*<sub>1</sub> = 15.2 min (major), *t*<sub>2</sub> = 17.6 min (minor));  $[\alpha]_D^{20} +76$  (*c* 0.72, CHCl<sub>3</sub>) for 95% ee. <sup>1</sup>H NMR (CDCl<sub>3</sub>) δ 1.05–1.12 (m, 21H), 1.84 (dd, *J* = 11.6, 8.5 Hz, 1H), 2.15 (dt, *J* = 11.6, 4.6 Hz, 1H), 2.40 (s, 3H), 2.45 (s, 3H), 2.50 (dd, *J* = 8.5, 4.6 Hz, 1H), 5.38 (s, 1H), 5.51 (d, *J* = 4.6 Hz, 1H); <sup>13</sup>C NMR (CDCl<sub>3</sub>) δ 11.3, 18.63, 18.64, 20.9, 21.1, 32.0, 36.4, 78.8, 81.8, 84.4, 110.3, 126.3, 126.7, 129.1, 129.3, 143.0, 143.7. HRMS (ESI) calcd for C<sub>23</sub>H<sub>32</sub>Br<sub>2</sub>NaOSi (M+Na)<sup>+</sup> 533.0481, found 533.0483.

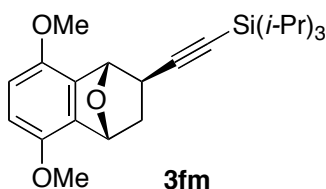

**Compound 3fm** (91% yield, 97% ee (1*S*,2*R*,4*R*)). The ee was measured by HPLC (Chiralcel OD-H column, flow 0.5 mL/min, hexane/2-propanol = 100/1, 254 nm,  $t_1$  = 11.7 min (major),  $t_2$  = 19.4 min (minor));  $[\alpha]_D^{20}$  +69 ( $c$  0.65, CHCl<sub>3</sub>) for 97% ee. <sup>1</sup>H NMR (CDCl<sub>3</sub>)  $\delta$  1.03–1.12 (m, 21H), 1.89 (dd,  $J$  = 11.4, 8.5 Hz, 1H), 2.12 (dt,  $J$  = 11.4, 4.5 Hz, 1H), 2.55 (dd,  $J$  = 8.5, 4.5 Hz, 1H), 3.79 (s, 3H), 3.80 (s, 3H), 5.50 (s, 1H), 5.62 (d,  $J$  = 4.5 Hz, 1H), 6.64 (d,  $J$  = 8.8 Hz, 1H), 6.65 (d,  $J$  = 8.8 Hz, 1H); <sup>13</sup>C NMR (CDCl<sub>3</sub>)  $\delta$  11.3, 18.7, 32.2, 36.6, 56.01, 56.03, 77.0, 80.9, 82.6, 111.1, 111.5, 133.7, 134.6, 146.5, 146.6. HRMS (ESI) calcd for C<sub>23</sub>H<sub>34</sub>NaO<sub>3</sub>Si (M+Na)<sup>+</sup> 409.2169, found 409.2167.

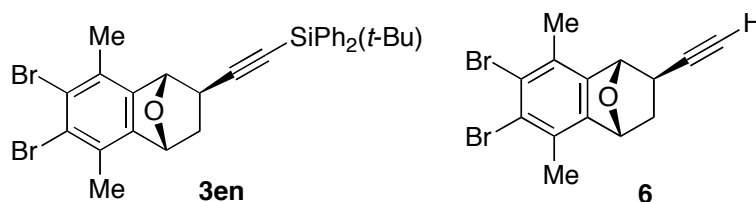

**Compound 3en** (60% yield, 90% ee (1*S*,2*R*,4*R*)). The ee of **3en** was determined by HPLC analysis of compound **6**, which was obtained by removal of a silyl group with tetrabutylammonium fluoride. **Compound 3en**:  $[\alpha]_D^{20}$  +67 ( $c$  1.02, CHCl<sub>3</sub>) for 90% ee. <sup>1</sup>H NMR (CDCl<sub>3</sub>)  $\delta$  1.11 (s, 9H), 1.93 (dd,  $J$  = 14.0, 10.1 Hz, 1H), 2.29 (dt,  $J$  = 14.0, 5.4 Hz, 1H), 2.43 (s, 3H), 2.48 (s, 3H), 2.64 (dd,  $J$  = 10.1, 5.4 Hz, 1H), 5.52 (s, 1H), 5.58 (d,  $J$  = 5.4 Hz, 1H), 7.34–7.44 (m, 6H), 7.78–7.84 (m, 4H); <sup>13</sup>C NMR (CDCl<sub>3</sub>)  $\delta$  18.6, 20.9, 21.2, 27.1, 32.2, 36.3, 78.8, 81.2, 84.2, 112.6, 126.4, 126.8, 127.7, 129.1, 129.37, 129.44, 133.47, 133.49, 135.6, 142.8, 143.7. HRMS (ESI) calcd for C<sub>30</sub>H<sub>30</sub>Br<sub>2</sub>NaOSi (M+Na)<sup>+</sup> 615.0325, found 615.0325. **Compound 6** (83% yield from **3en**): The ee was measured by HPLC (Chiralcel OD-H column, flow 0.5 mL/min, hexane/2-propanol = 100/1, 254 nm,  $t_1$  = 17.1 min (major),  $t_2$  = 22.3 min (minor));  $[\alpha]_D^{20}$  +67 ( $c$  0.91, CHCl<sub>3</sub>) for 90% ee. <sup>1</sup>H NMR (CDCl<sub>3</sub>)  $\delta$  1.85 (dd,  $J$  = 11.8, 8.5 Hz, 1H), 2.19 (ddd,  $J$  = 11.8, 5.0, 4.1 Hz, 1H), 2.22 (d,  $J$  = 2.5 Hz, 1H), 2.40 (s, 3H), 2.45 (s, 3H), 2.49 (ddd,  $J$  = 8.5, 4.1, 2.5 Hz, 1H), 5.44 (s, 1H), 5.54 (d,  $J$  = 5.0 Hz, 1H); <sup>13</sup>C NMR (CDCl<sub>3</sub>)  $\delta$  20.9, 21.1, 30.8, 35.9, 69.6, 78.8, 84.0, 86.1, 126.5, 126.9, 129.2, 129.4, 142.5, 143.7. HRMS (ESI) calcd for C<sub>14</sub>H<sub>12</sub>Br<sub>2</sub>NaO (M+Na)<sup>+</sup> 376.9147, found 376.9151.

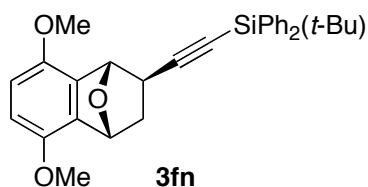

**Compound 3fn** (90% yield, 96% ee (1*S*,2*R*,4*R*)). The ee was measured by HPLC (Chiralcel OD-H column, flow 0.5 mL/min, hexane/2-propanol = 100/1, 254 nm,  $t_1$  = 18.0 min (major),  $t_2$  = 29.0 min (minor));  $[\alpha]_D^{20}$  +62 ( $c$  0.62, CHCl<sub>3</sub>) for 96% ee. <sup>1</sup>H NMR (CDCl<sub>3</sub>)  $\delta$  1.11 (s, 9H), 1.97 (dd,  $J$  = 11.5, 8.5 Hz, 1H), 2.26 (dt,  $J$  = 11.5, 4.5 Hz, 1H), 2.69 (dd,  $J$  = 8.5, 4.5 Hz, 1H), 3.81 (s, 3H), 3.82 (s, 3H), 5.65 (s, 1H), 5.69 (d,  $J$  = 4.5 Hz, 1H), 6.66 (d,  $J$  = 8.8 Hz, 1H), 6.67 (d,  $J$  = 8.8 Hz, 1H), 7.32–7.42 (m, 6H), 7.78–7.84 (m, 4H); <sup>13</sup>C NMR (CDCl<sub>3</sub>)  $\delta$  18.6, 27.1, 32.5, 36.6, 56.0, 56.1, 77.1, 80.3, 82.4, 111.2, 111.6, 113.5, 127.6, 129.3, 133.55, 133.69, 133.71, 134.5, 135.6, 146.6, 146.7. HRMS (ESI) calcd for C<sub>30</sub>H<sub>32</sub>NaO<sub>3</sub>Si (M+Na)<sup>+</sup> 491.2013, found 491.2017.

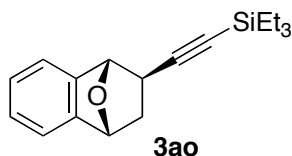

**Compound 3ao** (7% yield, 80% ee (1*S*,2*R*,4*R*)). The ee was measured by HPLC (Chiralpak AD-H column $\times$ 2, flow 0.5 mL/min, hexane/2-propanol = 200/1, 254 nm,  $t_1$  = 24.7 min (major),  $t_2$  = 27.3 min (minor));  $[\alpha]_D^{20}$  +58 ( $c$  0.21, CHCl<sub>3</sub>) for 80% ee. <sup>1</sup>H NMR (CDCl<sub>3</sub>)  $\delta$  0.61 (q,  $J$  = 8.0 Hz, 6H), 1.01 (t,  $J$  = 8.0 Hz, 9H), 1.87 (dd,  $J$  = 11.5, 8.5 Hz, 1H), 2.16 (dt,  $J$  = 11.5, 4.6 Hz, 1H), 2.55 (dd,  $J$  = 8.5, 4.6 Hz, 1H), 5.37 (s, 1H), 5.48 (d,  $J$  = 4.6 Hz, 1H), 7.13–7.19 (m, 2H), 7.20–7.24 (m, 1H), 7.24–7.29 (m, 1H); <sup>13</sup>C NMR (CDCl<sub>3</sub>)  $\delta$  4.5, 7.5, 32.7, 37.0, 79.1, 82.4, 84.6, 110.2, 119.1, 119.2, 126.8, 127.1, 144.5, 145.2. HRMS (ESI) calcd for C<sub>18</sub>H<sub>24</sub>NaOSi (M+Na)<sup>+</sup> 307.1489, found 307.1486.

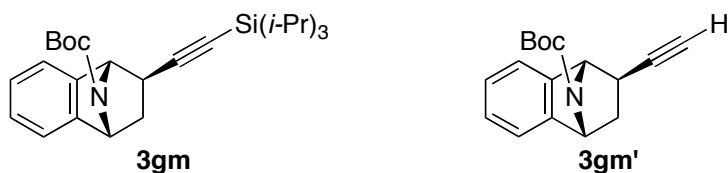

**Compound 3gm** (73% yield, 96% ee (1*S*,2*R*,4*R*)). The ee of **3gm** was determined by HPLC analysis of compound **3gm'**, which was obtained by removal of a silyl group with tetrabutylammonium fluoride. **Compound 3gm**:  $[\alpha]_D^{20}$  +96 ( $c$  0.42, CHCl<sub>3</sub>) for 96% ee. <sup>1</sup>H NMR (DMSO-*d*<sub>6</sub>, 60 °C)  $\delta$  0.99–1.10 (m, 21H), 1.30 (s, 9H), 1.75 (dd,  $J$  = 11.6, 8.5 Hz, 1H), 2.04 (dt,  $J$  = 11.6, 4.3 Hz, 1H), 2.44 (dd,  $J$  = 8.5, 4.3 Hz, 1H), 5.06 (s, 1H), 5.14 (d,  $J$  = 4.3 Hz, 1H), 7.09–7.17 (m, 2H), 7.25–7.31 (m, 1H), 7.34–7.40 (m, 1H); <sup>13</sup>C NMR (DMSO-*d*<sub>6</sub>, 60 °C)  $\delta$  10.5, 18.05, 18.06, 27.5, 32.1, 36.7, 59.8, 66.3, 78.8, 80.6, 111.2, 119.4, 119.7, 126.0, 126.4, 143.7, 144.8,

153.3. HRMS (ESI) calcd for  $C_{26}H_{39}NNaO_2Si$  ( $M+Na$ )<sup>+</sup> 448.2642, found 448.2632. **Compound 3gm'** (62% yield from **3gm**): The ee was measured by HPLC (Chiralpak AD-H column, flow 0.5 mL/min, hexane/2-propanol = 98/2, 230 nm,  $t_1$  = 18.4 min (minor),  $t_2$  = 20.0 min (major));  $[\alpha]_D^{20} +70$  ( $c$  0.91,  $CHCl_3$ ) for 96% ee.  $^1H$  NMR ( $DMSO-d_6$ , 60 °C)  $\delta$  1.34 (s, 9H), 1.74 (dd,  $J$  = 11.7, 8.4 Hz, 1H), 2.05 (dt,  $J$  = 11.6, 4.4 Hz, 1H), 2.41 (ddd,  $J$  = 8.4, 4.4, 2.3 Hz, 1H), 2.86 (d,  $J$  = 2.3 Hz, 1H), 5.09 (s, 1H), 5.14 (d,  $J$  = 4.4 Hz, 1H), 7.10–7.17 (m, 2H), 7.25–7.31 (m, 1H), 7.32–7.37 (m, 1H);  $^{13}C$  NMR ( $DMSO-d_6$ , 60 °C)  $\delta$  27.5, 31.1, 35.8, 60.1, 65.7, 71.6, 79.0, 85.9, 119.2, 119.5, 126.0, 126.4, 143.6, 144.3, 153.6. HRMS (ESI) calcd for  $C_{17}H_{19}NNaO_2$  ( $M+Na$ )<sup>+</sup> 292.1308, found 292.1306.

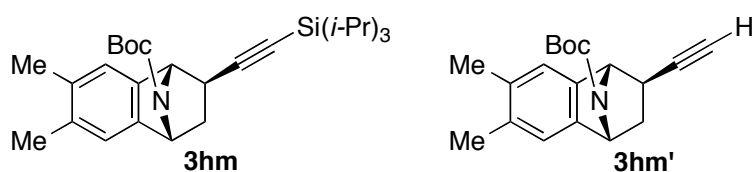

**Compound 3hm** (70% yield, 95% ee (1*S*,2*R*,4*R*)). The ee of **3hm** was determined by HPLC analysis of compound **3hm'**, which was obtained by removal of a silyl group with tetrabutylammonium fluoride. **Compound 3hm**:  $[\alpha]_D^{20} +96$  ( $c$  0.61,  $CHCl_3$ ) for 95% ee.  $^1H$  NMR ( $DMSO-d_6$ , 60 °C)  $\delta$  0.99–1.08 (m, 21H), 1.30 (s, 9H), 1.70 (dd,  $J$  = 11.4, 8.4 Hz, 1H), 2.00 (dt,  $J$  = 11.4, 4.3 Hz, 1H), 2.18 (s, 6H), 2.39 (dd,  $J$  = 8.4, 4.3 Hz, 1H), 4.97 (s, 1H), 5.06 (d,  $J$  = 4.3 Hz, 1H), 7.05 (s, 1H), 7.13 (s, 1H);  $^{13}C$  NMR ( $DMSO-d_6$ , 60 °C)  $\delta$  10.5, 18.065, 18.074, 18.9, 27.5, 32.5, 37.1, 59.6, 66.1, 78.6, 80.4, 111.4, 120.6, 120.9, 133.6, 134.0, 141.4, 142.5, 153.2. HRMS (ESI) calcd for  $C_{28}H_{43}NNaO_2Si$  ( $M+Na$ )<sup>+</sup> 476.2955, found 476.2954. **Compound 3hm'** (76% yield from **3hm**): The ee was measured by HPLC (Chiralpak AD-H column $\times$ 2, flow 0.5 mL/min, hexane/2-propanol = 98/2, 230 nm,  $t_1$  = 38.9 min (major),  $t_2$  = 46.3 min (minor));  $[\alpha]_D^{20} +81$  ( $c$  0.56,  $CHCl_3$ ) for 95% ee.  $^1H$  NMR ( $DMSO-d_6$ , 60 °C)  $\delta$  1.33 (s, 9H), 1.68 (dd,  $J$  = 11.6, 8.4 Hz, 1H), 2.01 (dt,  $J$  = 11.6, 4.4 Hz, 1H), 2.17 (s, 6H), 2.34 (ddd,  $J$  = 8.4, 4.4, 2.6 Hz, 1H), 2.81 (d,  $J$  = 2.6 Hz, 1H), 5.01 (s, 1H), 5.05 (d,  $J$  = 4.4 Hz, 1H), 7.03 (s, 1H), 7.09 (s, 1H);  $^{13}C$  NMR ( $DMSO-d_6$ , 60 °C)  $\delta$  18.91, 18.94, 27.6, 31.5, 36.3, 59.9, 65.7, 71.4, 78.9, 86.1, 120.5, 120.7, 133.6, 134.1, 141.4, 142.0, 153.6. HRMS (ESI) calcd for  $C_{19}H_{23}NNaO_2$  ( $M+Na$ )<sup>+</sup> 320.1621, found 320.1615.

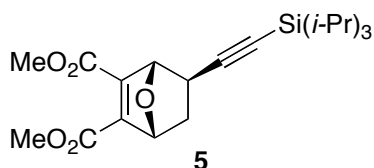

**Compound 5** (60% yield, 95% ee (1*S*,2*R*,4*R*)). The ee was measured by HPLC (Chiralcel OD-H column, flow 0.5 mL/min, hexane/2-propanol = 500/1, 254 nm,  $t_1$  = 49.5 min (major),  $t_2$  =

58.1 min (minor));  $[\alpha]_D^{20} +16$  ( $c$  0.98,  $\text{CHCl}_3$ ) for 95% ee.  $^1\text{H}$  NMR ( $\text{CDCl}_3$ )  $\delta$  1.00–1.10 (m, 21H), 1.97 (dd,  $J = 11.7, 8.3$  Hz, 1H), 2.05 (dt,  $J = 11.7, 4.4$  Hz, 1H), 2.66 (dd,  $J = 8.3, 4.4$  Hz, 1H), 3.81 (s, 3H), 3.83 (s, 3H), 5.19 (d,  $J = 1.0$  Hz, 1H), 5.30 (dd,  $J = 4.4, 0.9$  Hz, 1H);  $^{13}\text{C}$  NMR ( $\text{CDCl}_3$ )  $\delta$  11.2, 18.6, 30.6, 34.5, 52.32, 52.36, 80.6, 81.9, 86.1, 109.1, 143.0, 144.1, 162.56, 162.58. HRMS (ESI) calcd for  $\text{C}_{21}\text{H}_{32}\text{NaO}_5\text{Si}$  ( $\text{M}+\text{Na}$ ) $^+$  415.1911, found 415.1906.

## 5. Deuterium labeling experiments

### 5.1. A procedure for preparation of deuterated alkyne **2m-d** [CAS: 112440-16-1]

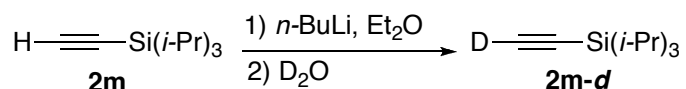

To a solution of (triisopropylsilyl)acetylene **2m** (4.49 mL, 20.0 mmol) in  $\text{Et}_2\text{O}$  (20 mL) was slowly added  $n\text{-BuLi}$  (14.7 mL, 24.0 mmol, 1.63 M solution in hexane) at  $-78$  °C, and it was stirred at the same temperature for 30 min and at room temperature for 1 h.  $\text{D}_2\text{O}$  (1.1 mL, 60 mmol) was added at 0 °C and the mixture was passed through a short column of silica gel. Evaporation of the solvent followed by bulb-to-bulb distillation gave deuterated acetylene **2m-d** (3.02 g, 16.5 mmol, 82% yield, 98% D determined by  $^1\text{H}$  NMR).

### 5.2 A procedure for cobalt-catalyzed addition of deuterated alkyne **2m-d** to oxabenzonorbornadiene **1f**

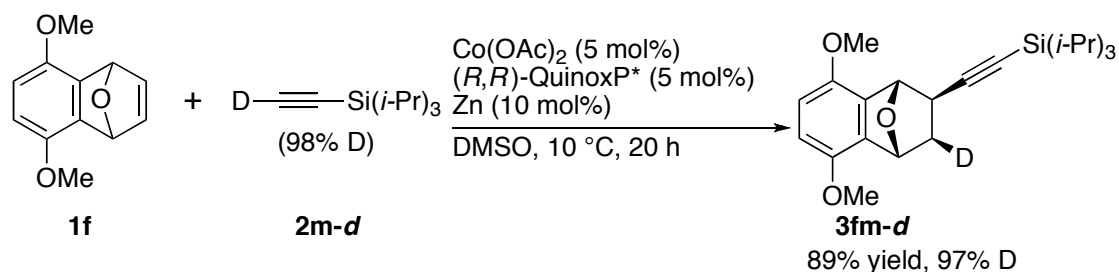

A mixture of  $\text{Co(OAc)}_2$  (1.8 mg, 0.010 mmol),  $(R,R)$ -QuinoxP\* (3.3 mg, 0.010 mmol), and Zn powder (1.3 mg, 0.020 mmol) in DMSO (0.3 mL) was stirred at room temperature for 15 min. The mixture was cooled to 10 °C, and oxabenzonorbornadiene **1f** (28.8 mg, 0.200 mmol) and deuterated alkyne **2m-d** (73.4 mg, 0.400 mmol) were added. The mixture was stirred at 10 °C for 20 h, and then it was passed through a short column of alumina with diethyl ether as eluent. After removal of the solvent on a rotary evaporator, the residue was subjected to preparative TLC (silica gel, hexane/ethyl acetate = 10/1) to give compound **3fm-d** (69.2 mg, 0.18 mmol, 89%, 97% D determined by  $^1\text{H}$ -NMR). Compound **3fm-d**.  $^1\text{H}$  NMR ( $\text{CDCl}_3$ )  $\delta$  1.02–1.11 (m, 21H), 1.87 (d,  $J = 8.4$  Hz, 1H), 2.54 (d,  $J = 8.4$  Hz, 1H), 3.79 (s, 3H), 3.80 (s, 3H), 5.50 (s, 1H), 5.62 (s, 1H), 6.64 (d,  $J = 8.8$  Hz, 1H), 6.65 (d,  $J = 8.8$  Hz, 1H).



### 5.3 A procedure for deuterium labeling experiment of alkyne **2m-d** and **2n** with oxabenzonorbornadiene **1f** in the presence of $\text{Co}(\text{OAc})_2/(\text{R,R})\text{-QuinoxP}^*$

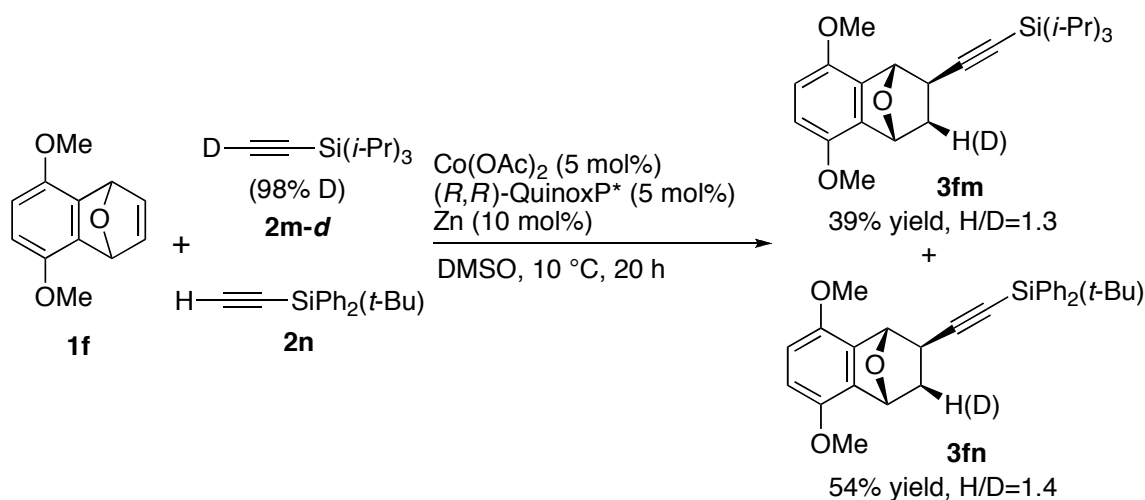

A mixture of  $\text{Co}(\text{OAc})_2$  (1.8 mg, 0.010 mmol),  $(\text{R,R})\text{-QuinoxP}^*$  (3.3 mg, 0.010 mmol), and Zn powder (1.3 mg, 0.020 mmol) in DMSO (0.3 mL) was stirred at room temperature for 15 min. The mixture was cooled to 10 °C, and oxabenzonorbornadiene **1f** (40.8 mg, 0.20 mmol), deuterated alkyne **2m-d** (36.7 mg, 0.200 mmol), and (*tert*-butyldiphenylsilyl)acetylene **2n** (52.9 mg, 0.200 mmol) were added. The mixture was stirred at 10 °C for 20 h, and then it was passed through a short column of alumina with diethyl ether as eluent. After removal of the solvent on a rotary evaporator, the residue was subjected to preparative TLC (silica gel, hexane/ethyl acetate = 10/1) to give **3fm** (30.0 mg, 0.0775 mmol, 39%, H/D = 1.3 determined by <sup>1</sup>H-NMR) and **3fn** (50.2 mg, 0.107 mmol, 54%, H/D = 1.4 determined by <sup>1</sup>H-NMR). Compound **3fn-d**. <sup>1</sup>H NMR ( $\text{CDCl}_3$ )  $\delta$  1.12 (s, 9H), 1.97 (d,  $J = 8.4$  Hz, 1H), 2.71 (d,  $J = 8.4$  Hz, 1H), 3.81 (s, 3H), 3.83 (s, 3H), 5.66 (s, 1H), 5.71 (s, 1H), 6.67 (d,  $J = 8.9$  Hz, 1H), 6.68 (d,  $J = 8.9$  Hz, 1H), 7.35–7.44 (m, 6H), 7.81–7.88 (m, 4H).

### 6. Transformation of **3em** into **6** and the data for X-ray crystal structure of compound **6**

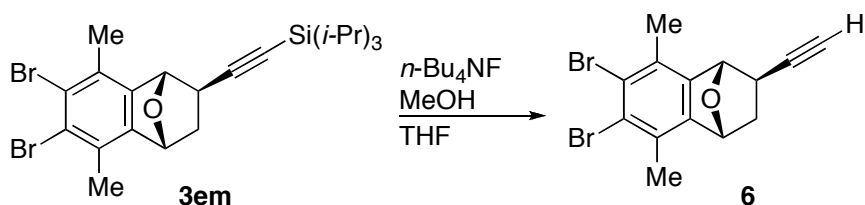

To a mixture of **3em** (60.2 mg, 0.117 mmol), MeOH (9.5  $\mu\text{L}$ , 0.23 mmol), and THF (0.6 mL) was added tetrabutylammonium fluoride (0.23 mL, 0.23 mmol, 1.0 M solution in THF) at room temperature, and it was stirred for 2 h. The resulting mixture was passed through a short column of alumina with diethyl ether as eluent. After evaporation of the solvent, the residue was subjected to preparative TLC (silica gel, hexane/ethyl acetate = 20/1) and GPC purification to give compound

**6** (34.8 mg, 0.0977 mmol, 84%). The ee was measured by HPLC (Chiralcel OD-H column, flow 0.5 mL/min, hexane/2-propanol = 100/1, 254 nm,  $t_1 = 16.4$  min (major),  $t_2 = 21.1$  min (minor));  $[\alpha]_D^{20} +74$  ( $c$  0.70,  $\text{CHCl}_3$ ) for 95% ee. Colorless crystals of **6** suitable for X-ray crystallographic analysis were obtained by recrystallization from hexane. The ORTEP drawing of **6** is shown in Figure S1. The crystal structure has been deposited at the Cambridge Crystallographic Centre (deposition number: CCDC 865189). The data can be obtained free of charge via [www.ccdc.cam.ac.uk/data\\_request/cif](http://www.ccdc.cam.ac.uk/data_request/cif).

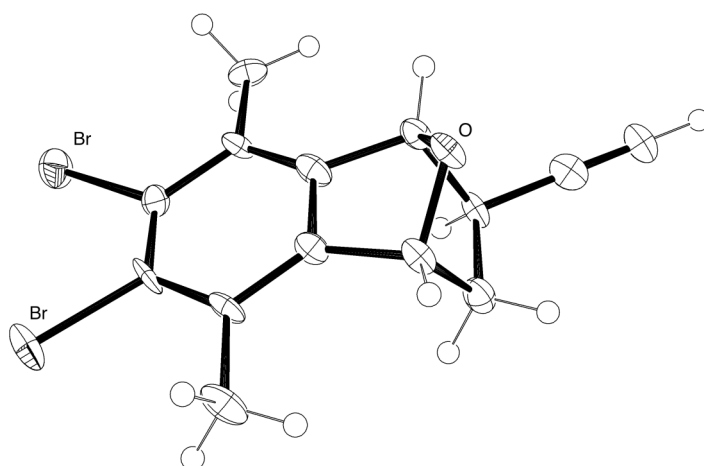

**Figure S1.** ORTEP illustration of **6** with thermal ellipsoids drawn at the 50% probability level.

X-Ray data were collected on a Rigaku RAXIS-RAPID imaging plate diffractometer using a graphite monochromator with  $\text{Cu-K}\alpha$  radiation ( $\lambda = 1.54187 \text{ \AA}$ ) at 93 K. The structure was solved by direct method (SHELXS-97) and refined with full-matrix least-square technique (SHELXL-97).<sup>2</sup> The absolute structure was deduced based on Flack parameter<sup>3</sup> 0.03(4), refining using 977 Friedel pairs. The data for **6** was shown in Table S1.

2 Sheldrick, G. M. Program for the solution and refinement of crystal structures, University of Göttingen, Göttingen, Germany, 1997.

3 Flack, H. D. *Acta Cryst.* 1983, **A39**, 876.

**Table S1.** Crystal data and structure refinement for **6**

---

|                                                                |                                                          |
|----------------------------------------------------------------|----------------------------------------------------------|
| Empirical formula                                              | C <sub>14</sub> H <sub>12</sub> Br <sub>2</sub> O        |
| Formula weight                                                 | 356.06                                                   |
| Temperature                                                    | 93(2) K                                                  |
| Crystal system                                                 | Orthorhombic                                             |
| Space group                                                    | P2 <sub>1</sub> 2 <sub>1</sub> 2 <sub>1</sub> (#19)      |
| Unit cell dimensions                                           | a = 6.96810(10) Å<br>b = 9.1696(2) Å<br>c = 20.5119(4) Å |
| Volume                                                         | 1310.60(4) Å <sup>3</sup>                                |
| Z                                                              | 4                                                        |
| Density (calculated) [Mg/m <sup>3</sup> ]                      | 1.804                                                    |
| $\mu$ (mm <sup>-1</sup> )                                      | 2.340                                                    |
| F(000)                                                         | 696.00                                                   |
| No. of reflections                                             | 12088                                                    |
| Independent reflections                                        | 2391 [R(int) = 0.089]                                    |
| No. of parameters                                              | 156                                                      |
| Completeness to $\theta$ (%)                                   | 99.9                                                     |
| GOF                                                            | 0.838                                                    |
| $R_1$ [ $I > 2\sigma(I)$ ]                                     | 0.0392                                                   |
| $wR_2$ (all data)                                              | 0.0465                                                   |
| Flack Parameter                                                | 0.03(4) (Friedel pairs: 977)                             |
| Largest diff. peak and hole [e <sup>-</sup> /Å <sup>-3</sup> ] | 0.73 and -0.81                                           |

---

## 7. $^1\text{H}$ , $^{13}\text{C}$ NMR spectra, and chiral HPLC charts

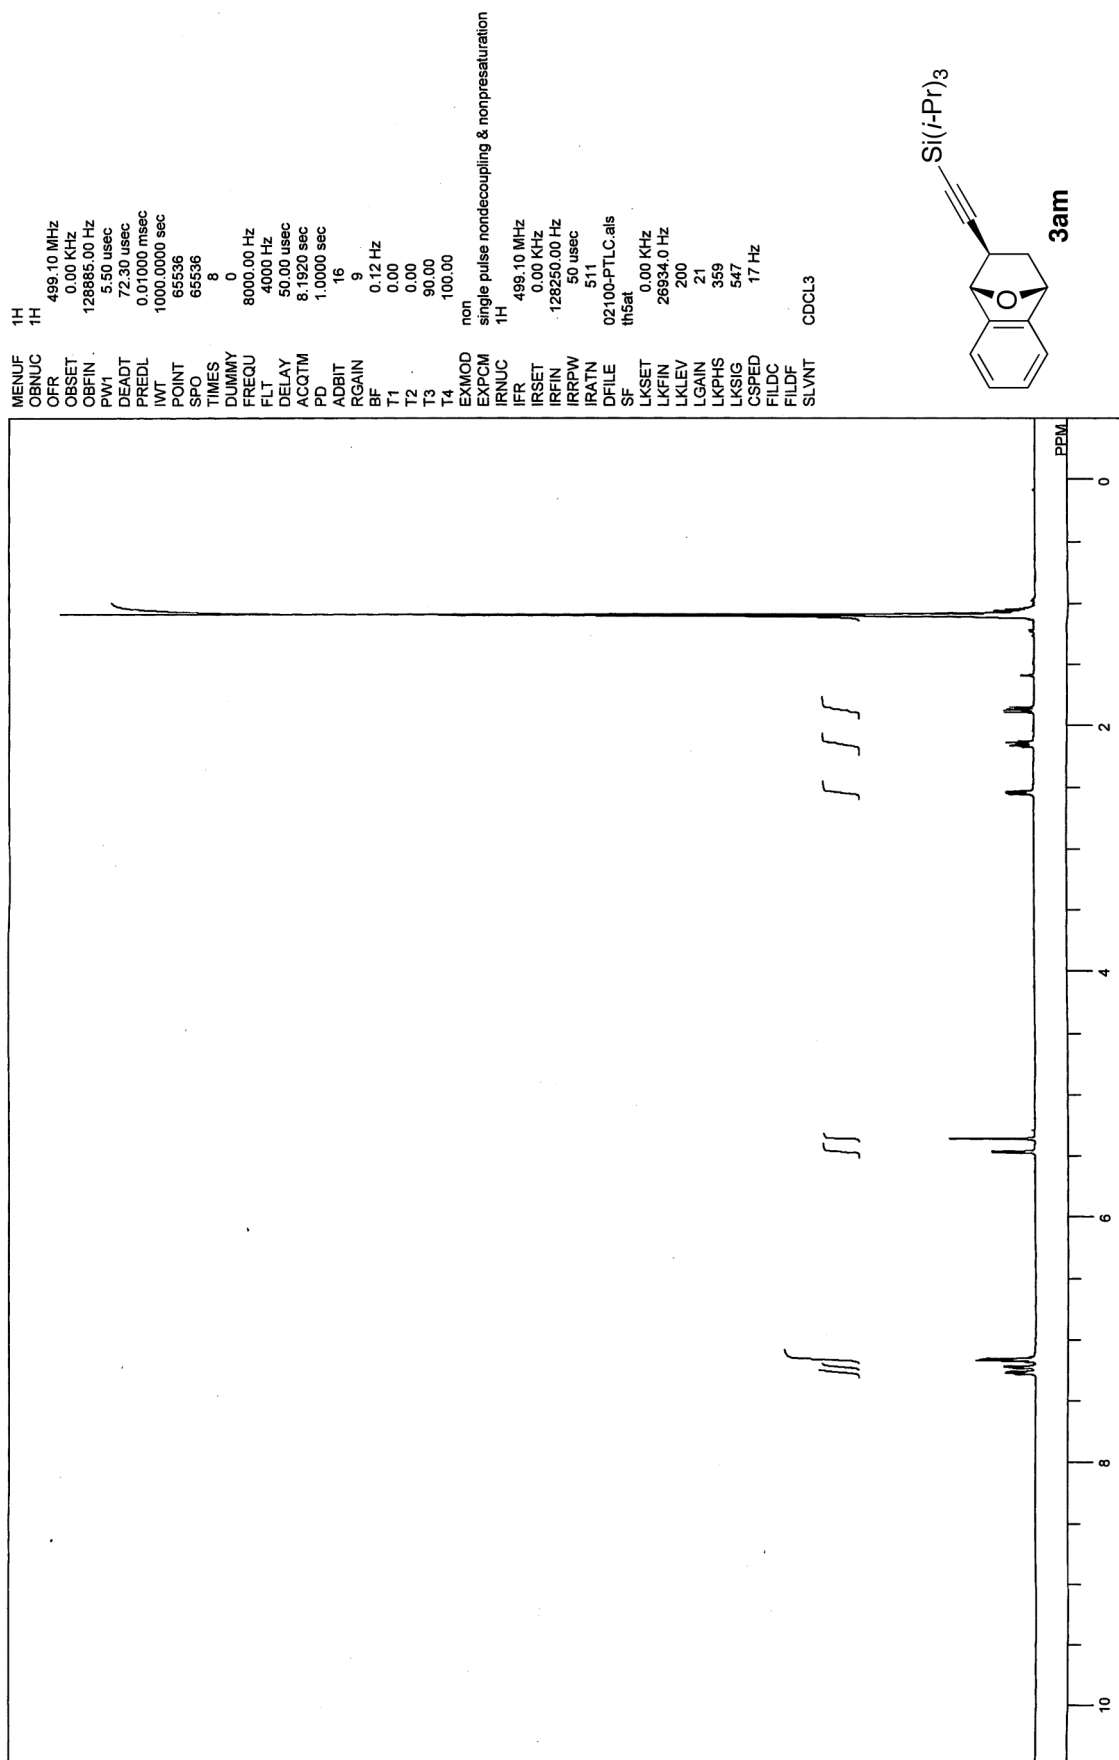

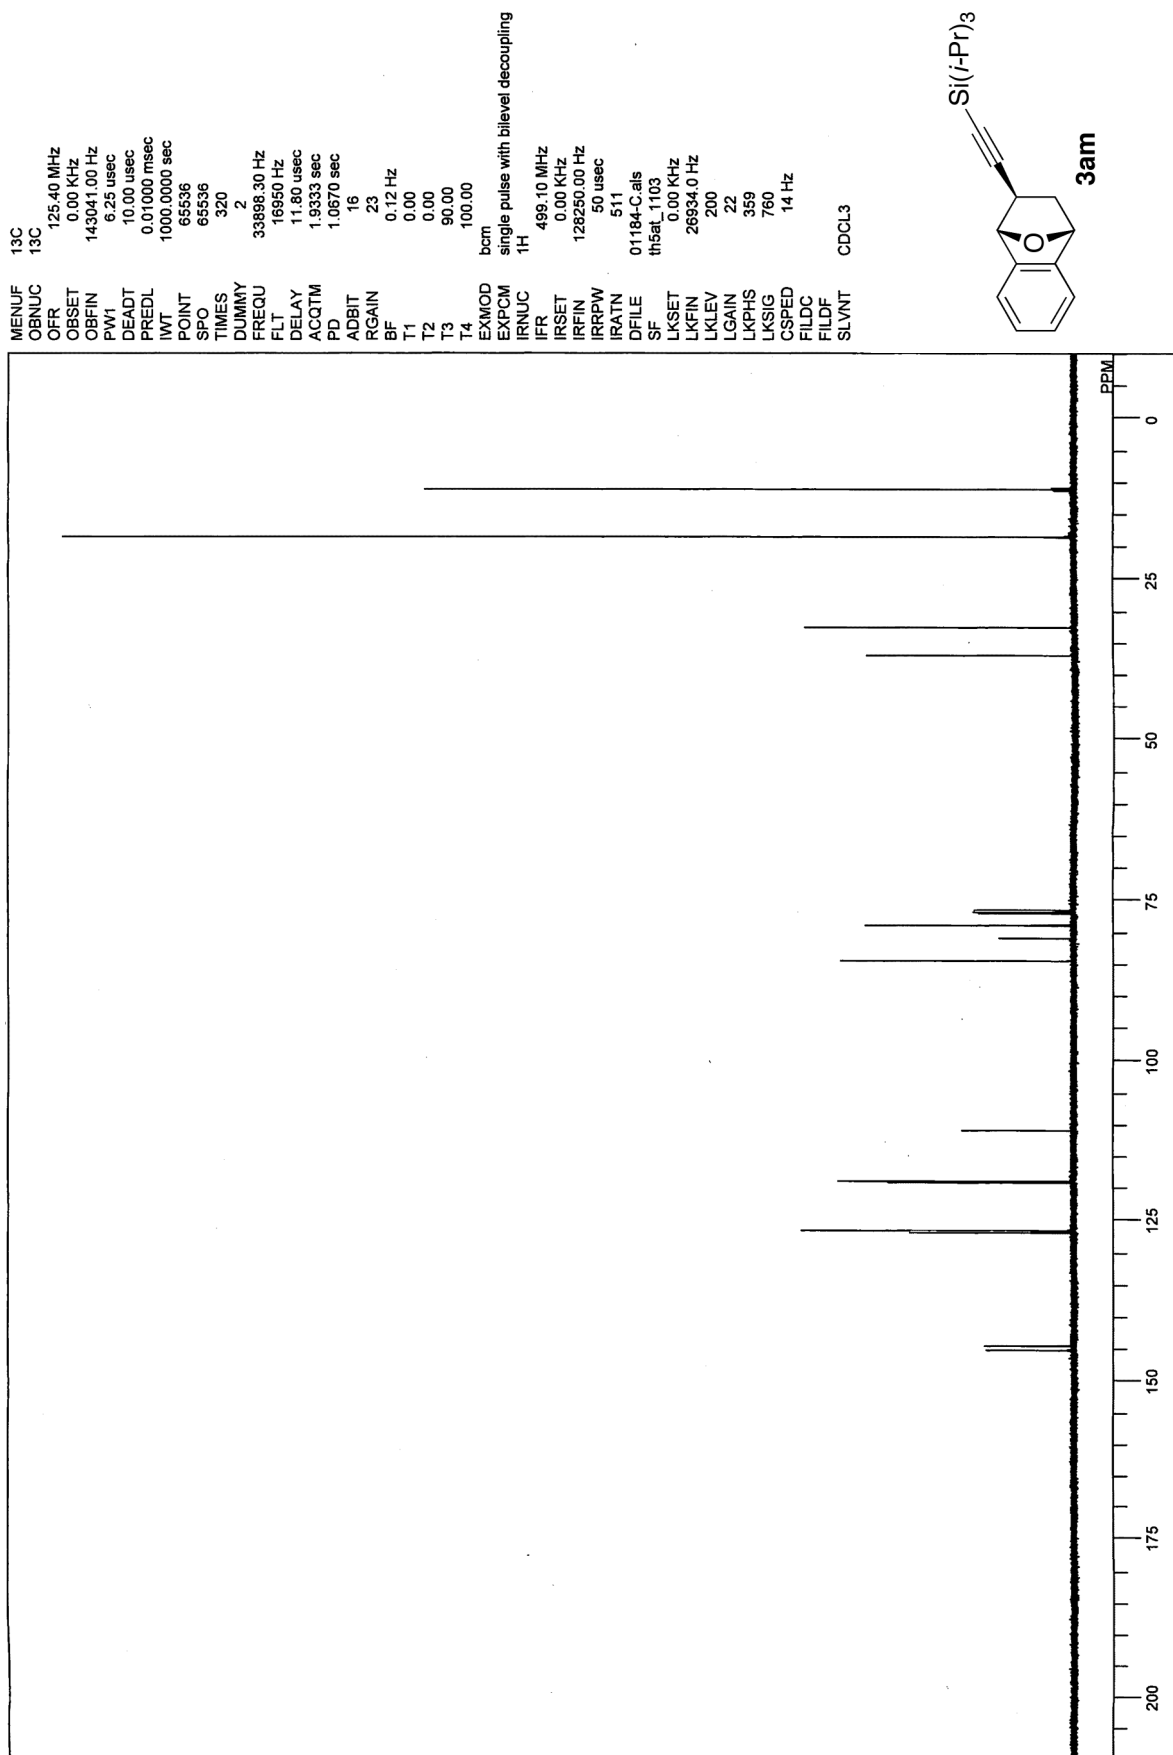

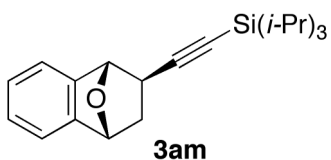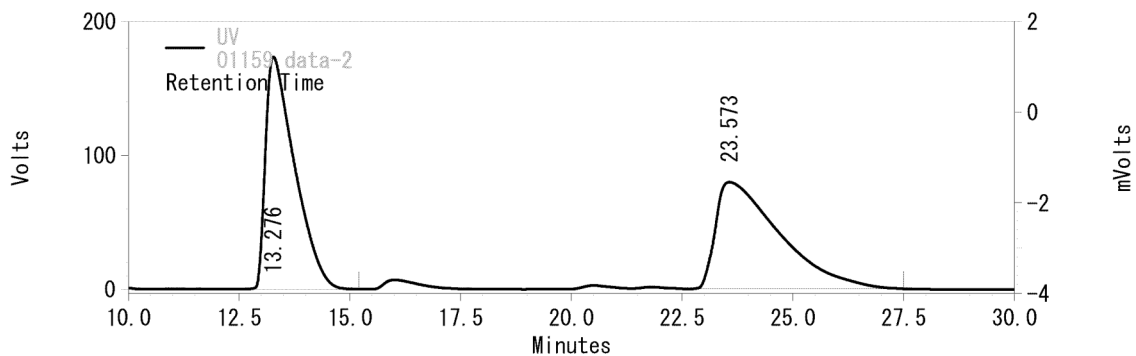

**UV Results**

| Pk #          | Retention Time | Area     | Area Percent | Height |
|---------------|----------------|----------|--------------|--------|
| 1             | 13.276         | 7934878  | 49.752       | 173329 |
| 2             | 23.573         | 8013965  | 50.248       | 79596  |
| <b>Totals</b> |                | 15948843 | 100.000      | 252925 |

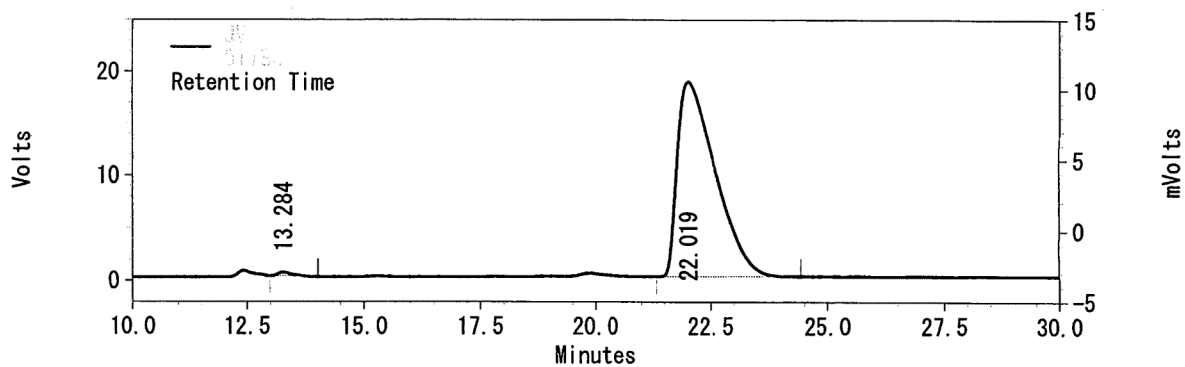

**UV Results**

| Pk #          | Retention Time | Area    | Area Percent | Height |
|---------------|----------------|---------|--------------|--------|
| 1             | 13.284         | 7933    | 0.738        | 364    |
| 2             | 22.019         | 1067131 | 99.262       | 18618  |
| <b>Totals</b> |                | 1075064 | 100.000      | 18982  |

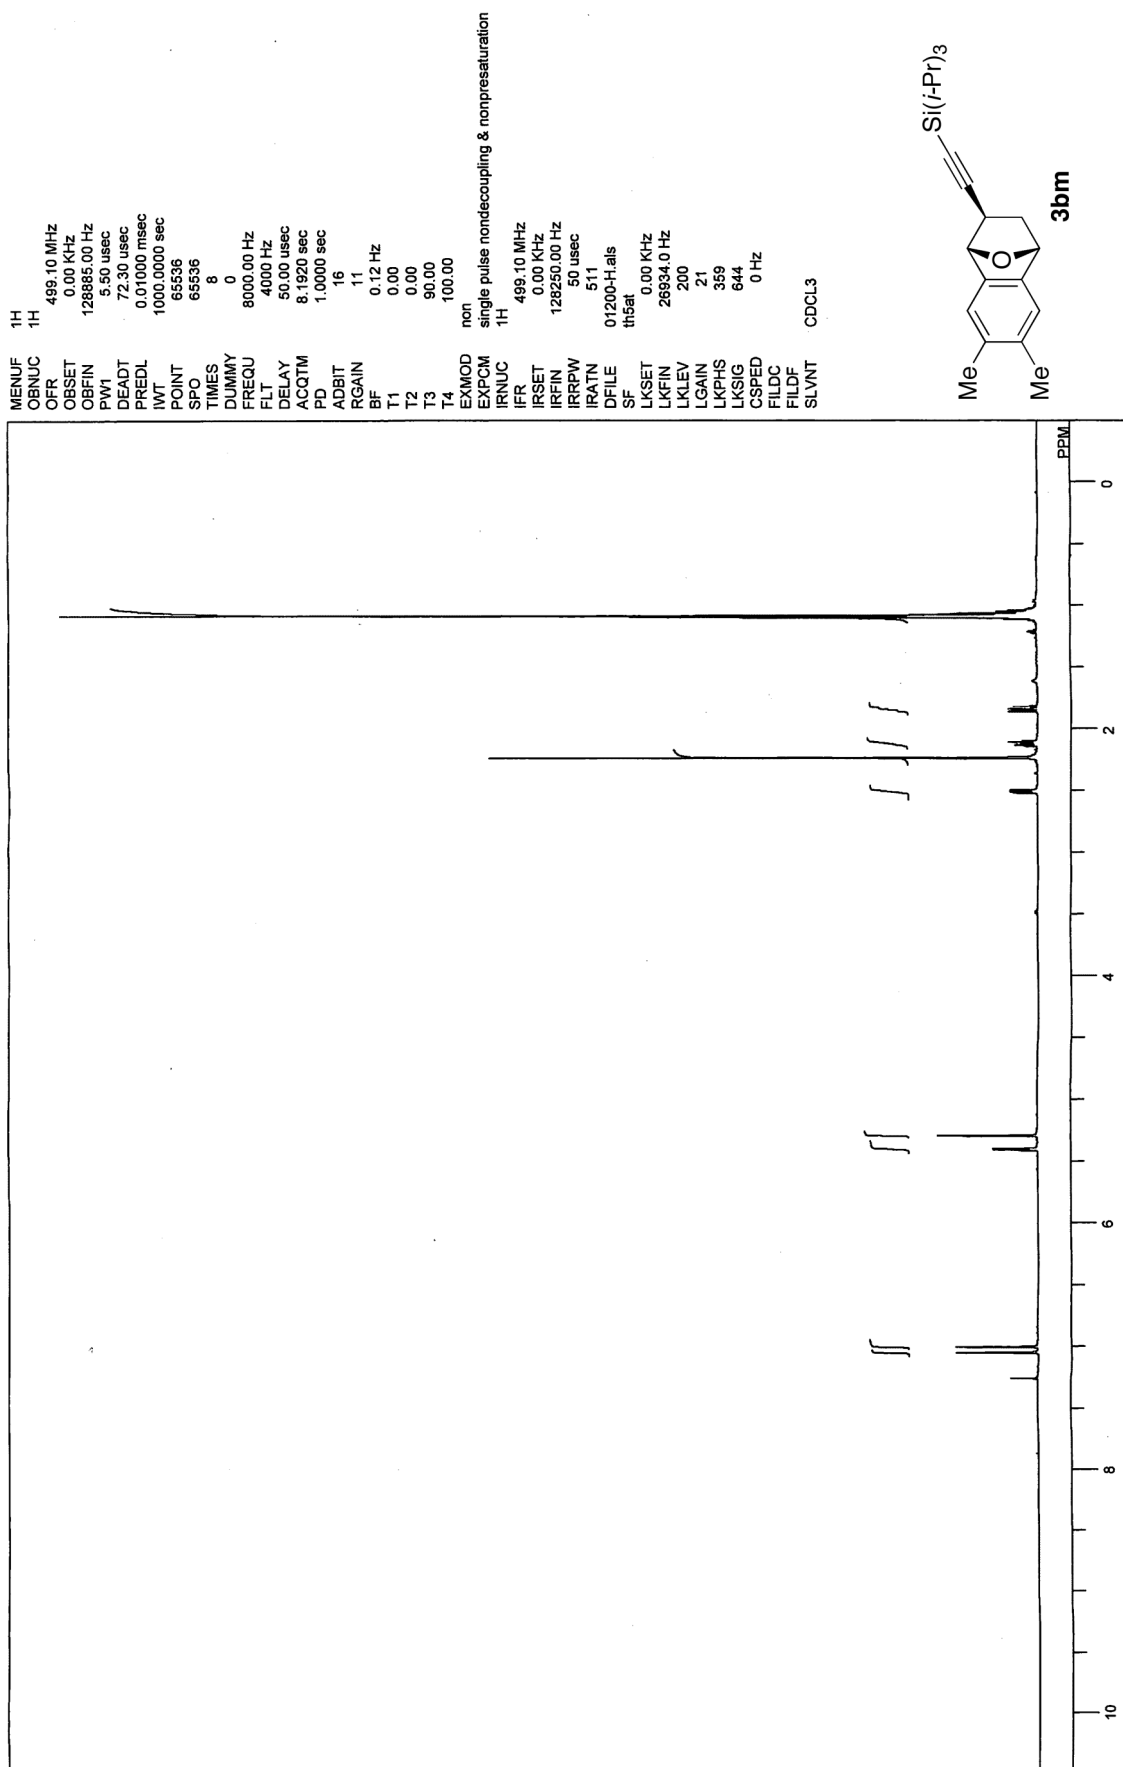

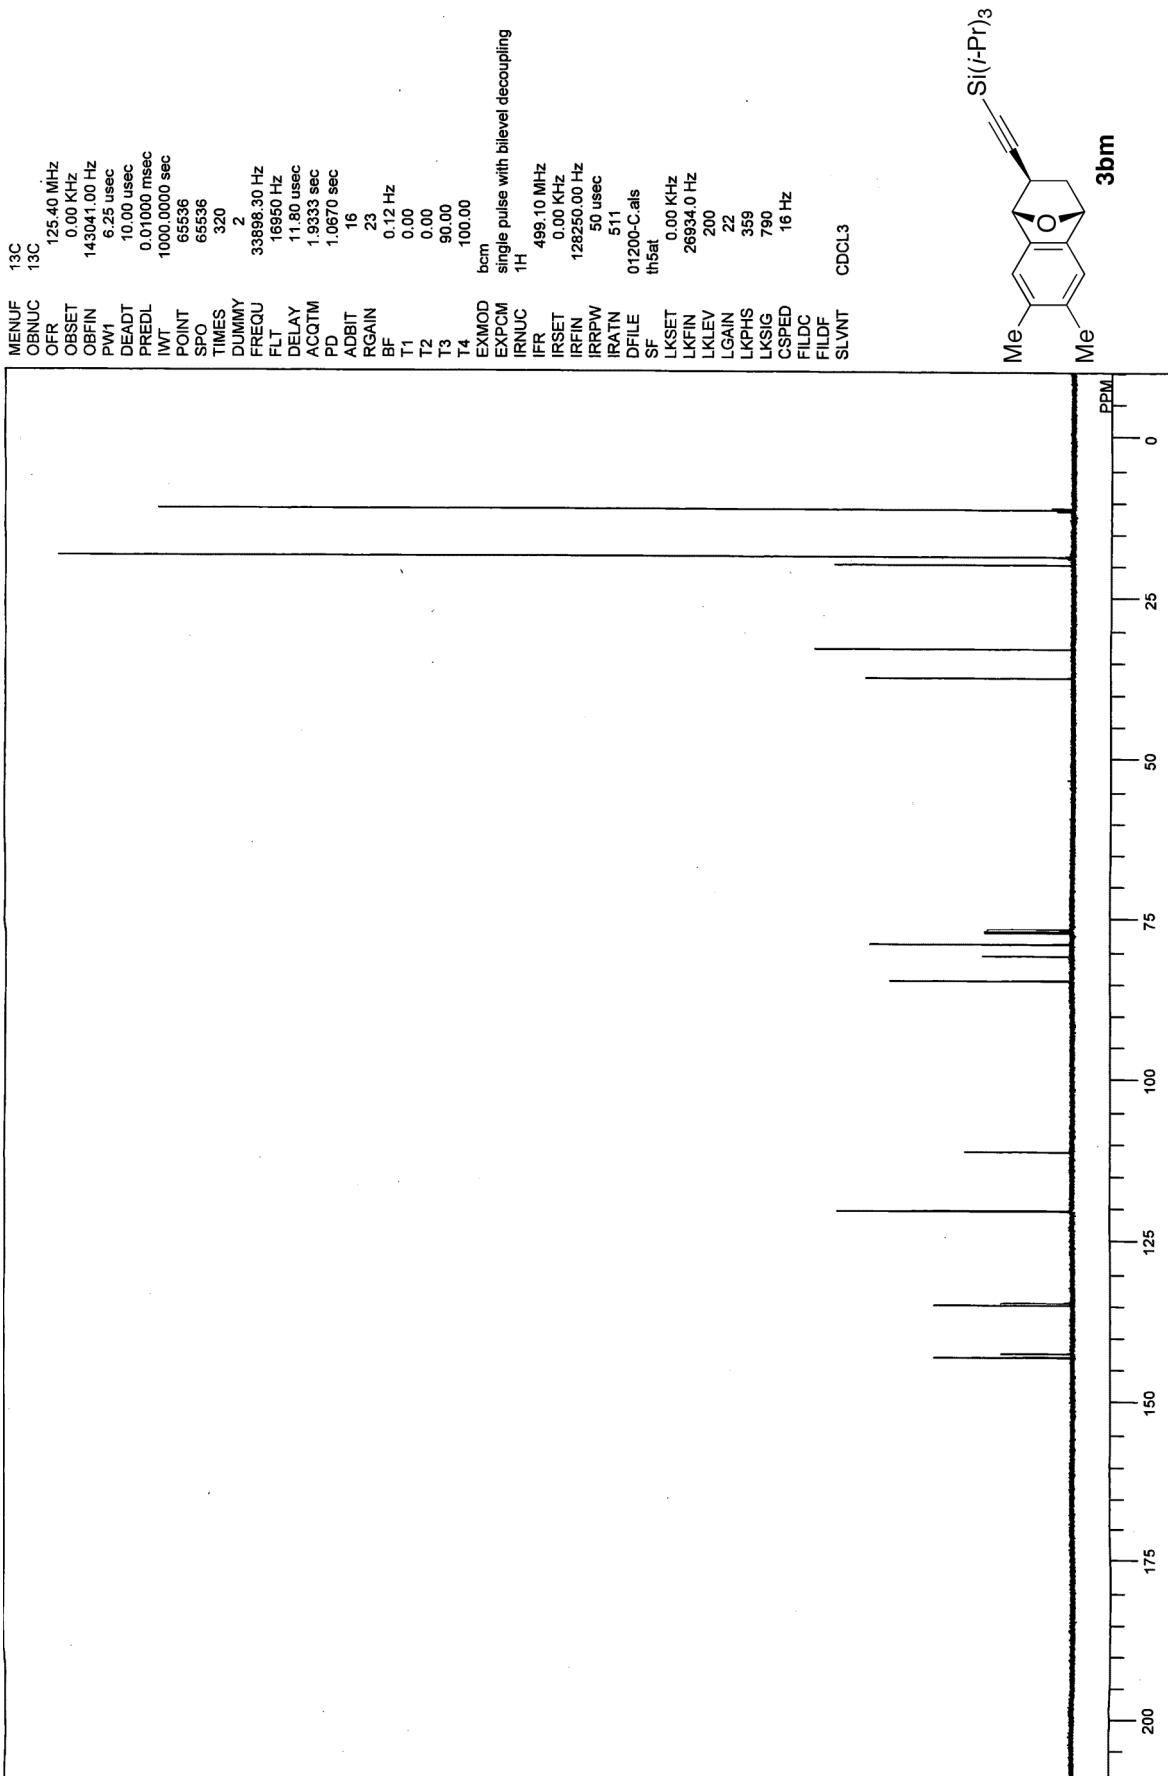



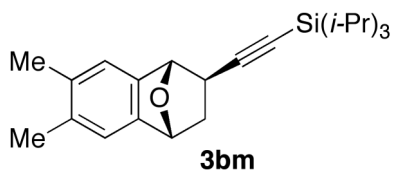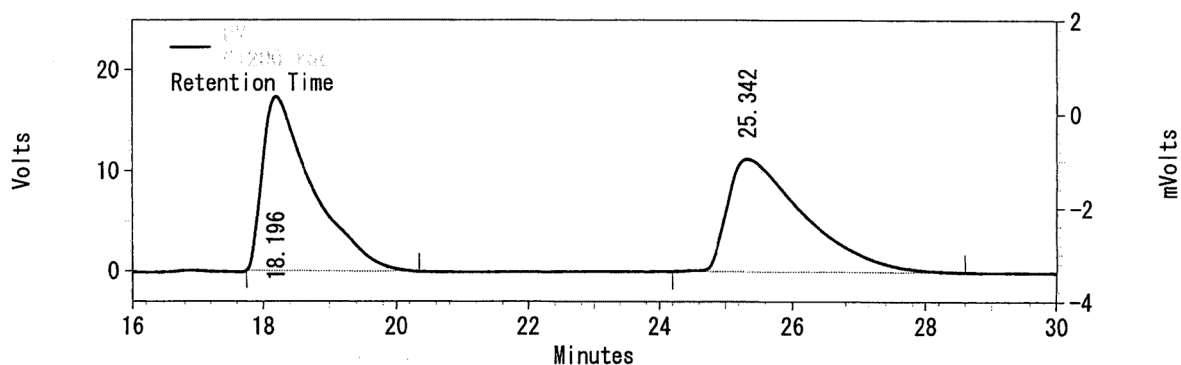

**UV Results**

| Pk #          | Retention Time | Area           | Area Percent   | Height       |
|---------------|----------------|----------------|----------------|--------------|
| 1             | 18.196         | 911345         | 50.495         | 17320        |
| 2             | 25.342         | 893466         | 49.505         | 11259        |
| <b>Totals</b> |                | <b>1804811</b> | <b>100.000</b> | <b>28579</b> |

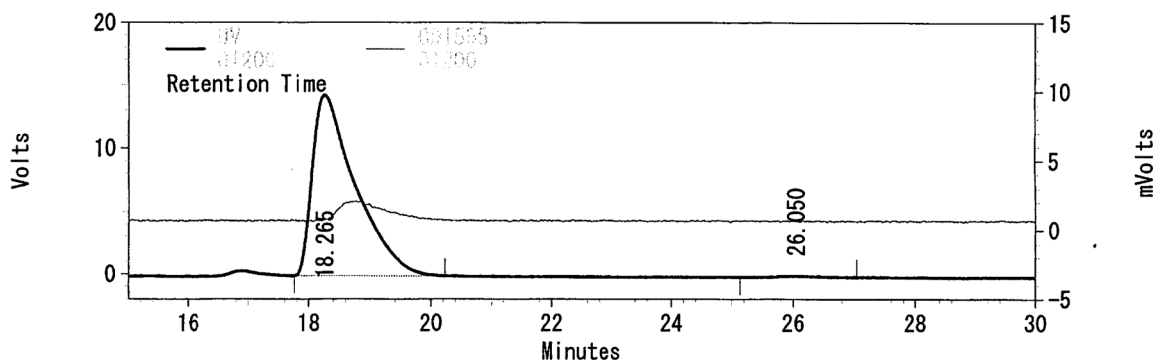

**UV Results**

| Pk #          | Retention Time | Area          | Area Percent   | Height       |
|---------------|----------------|---------------|----------------|--------------|
| 1             | 18.265         | 702955        | 99.567         | 14337        |
| 2             | 26.050         | 3059          | 0.433          | 83           |
| <b>Totals</b> |                | <b>706014</b> | <b>100.000</b> | <b>14420</b> |

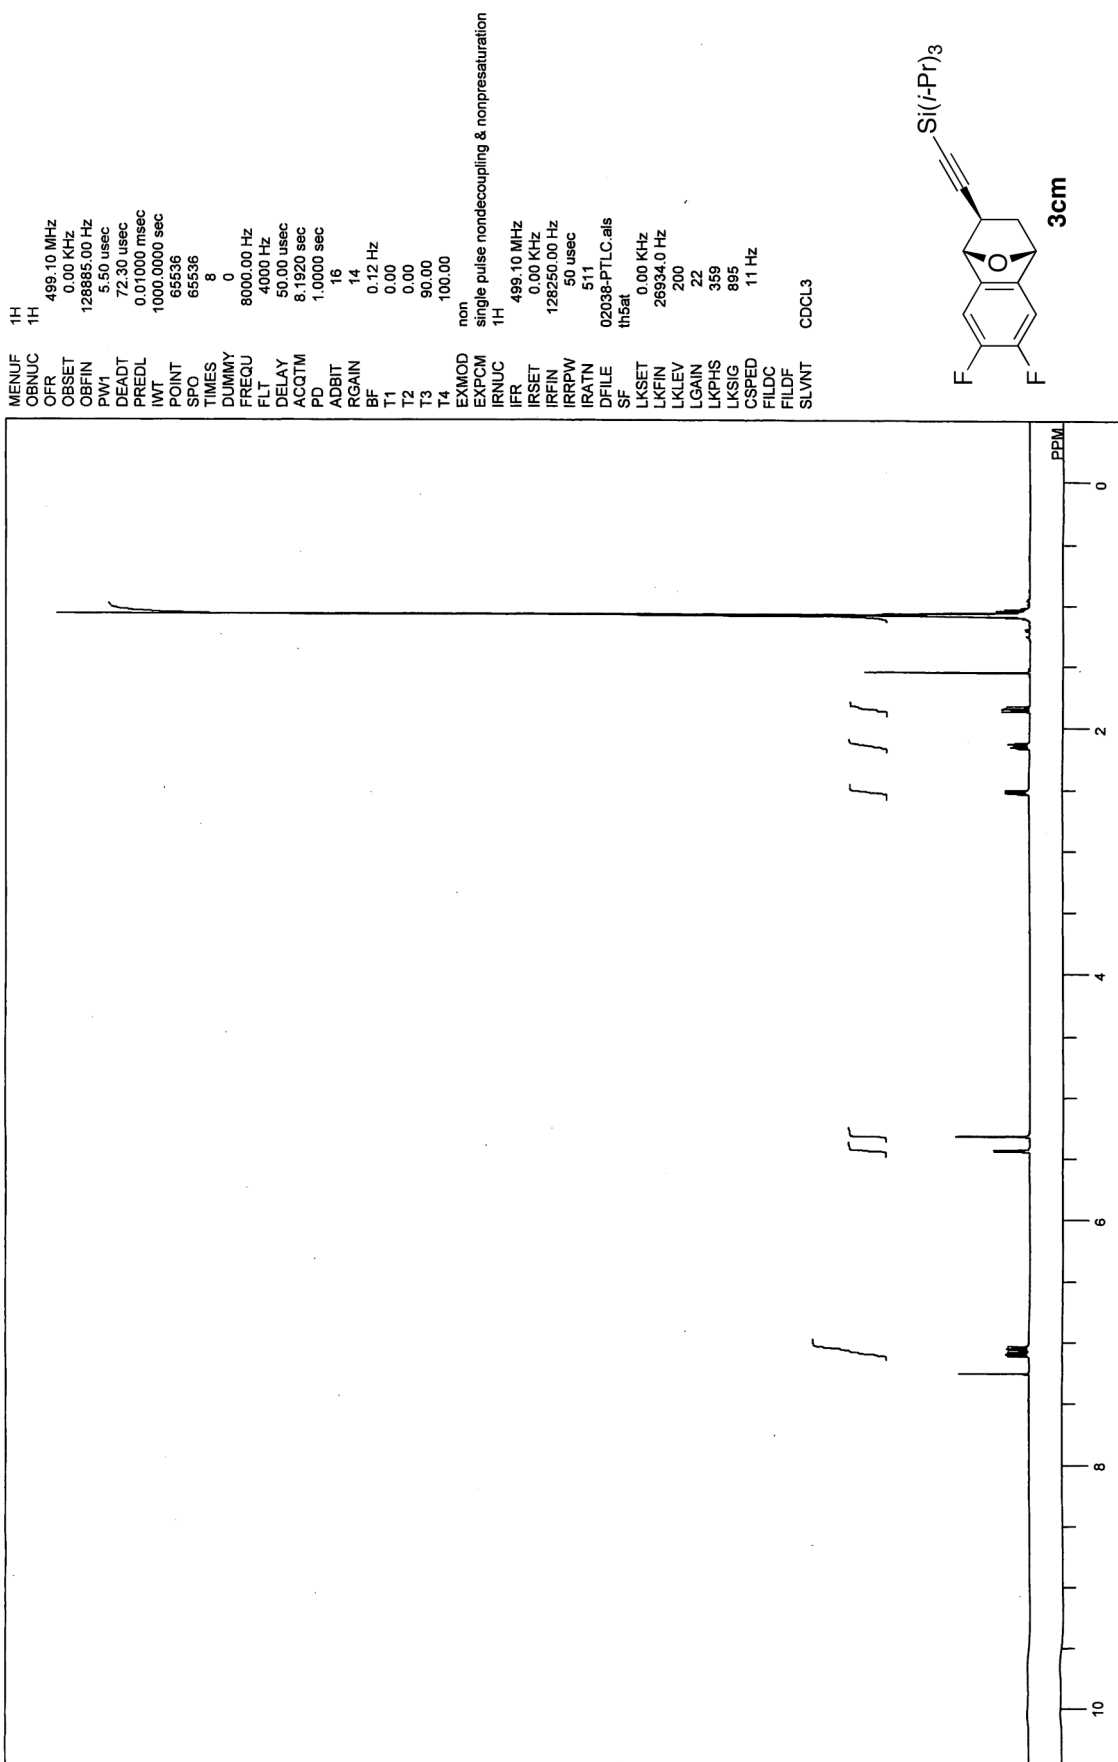

<sup>13</sup>C  
 13C  
 MENUF  
 OBRNUC 125.40 MHz  
 OFR 0.00 KHz  
 OBSSET 143041.00 Hz  
 OBFIN 6.25 usec  
 PW1 10.00 usec  
 DEADT 0.01000 msec  
 PREDL 1000.0000 sec  
 IWT 65536  
 POINT SPO 65536  
 SPO 320  
 TIMES 2  
 DUMMY 33868.30 Hz  
 FREQU 16960 Hz  
 FLT 11.80 usec  
 DELAY 1.9333 sec  
 ACQTM 1.0670 sec  
 PD 16  
 ADBIT 24  
 RGAIN 0.12 Hz  
 BF 0.00  
 T1 0.00  
 T2 90.00  
 T3 100.00  
 T4  
 EXMOD bcm  
 EXPCM single pulse with bilevel decoupling  
 IRNUC 1H  
 IFR 499.10 MHz  
 IRSET 0.00 KHz  
 IRFIN 128250.00 Hz  
 IRRPW 50 usec  
 IRATN 511  
 DFILE 02022-C.als  
 SF th5at  
 LKSET 0.00 KHz  
 LKFIN 26934.0 Hz  
 LKLEV 200  
 LGAIN 21  
 LKPHS 359  
 LKSIG 612  
 CSPED 16 Hz  
 FILDC  
 FILDF  
 SLVNT CDCL3

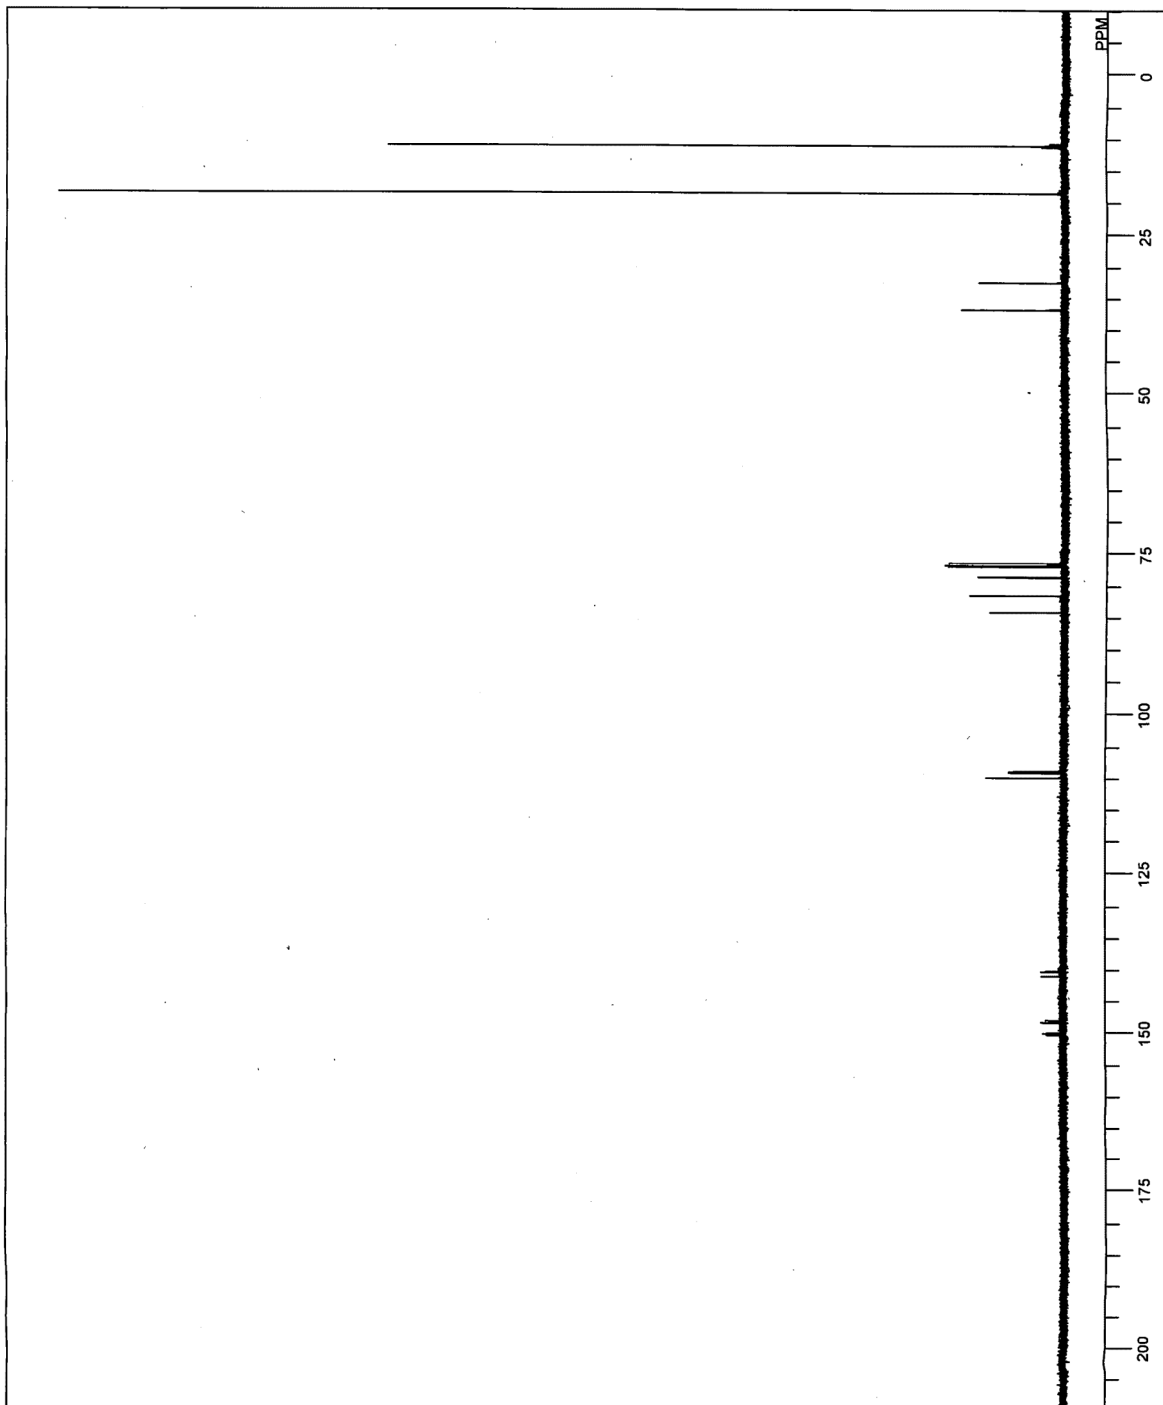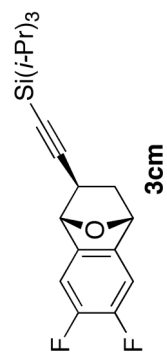

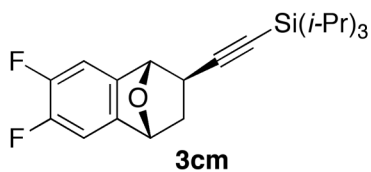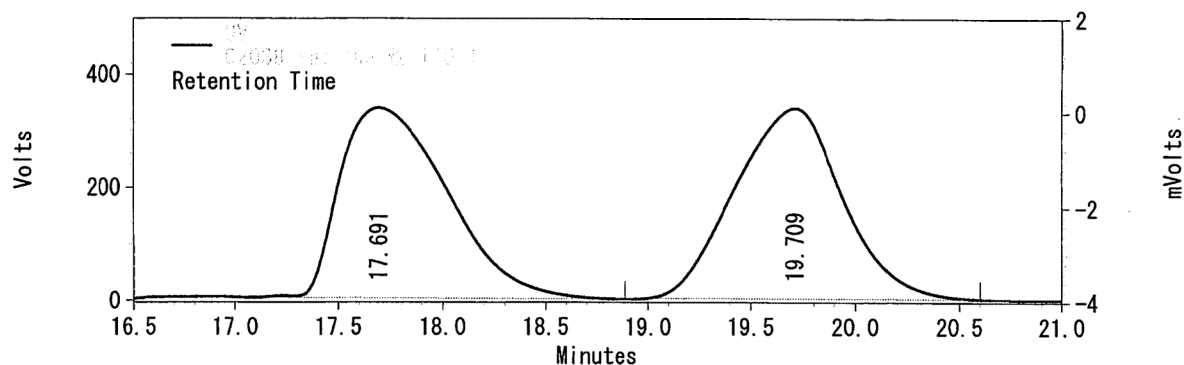

**UV Results**

| Pk #          | Retention Time | Area     | Area Percent | Height |
|---------------|----------------|----------|--------------|--------|
| 1             | 17.691         | 12023233 | 49.832       | 336145 |
| 2             | 19.709         | 12104489 | 50.168       | 336866 |
| <b>Totals</b> |                | 24127722 | 100.000      | 673011 |

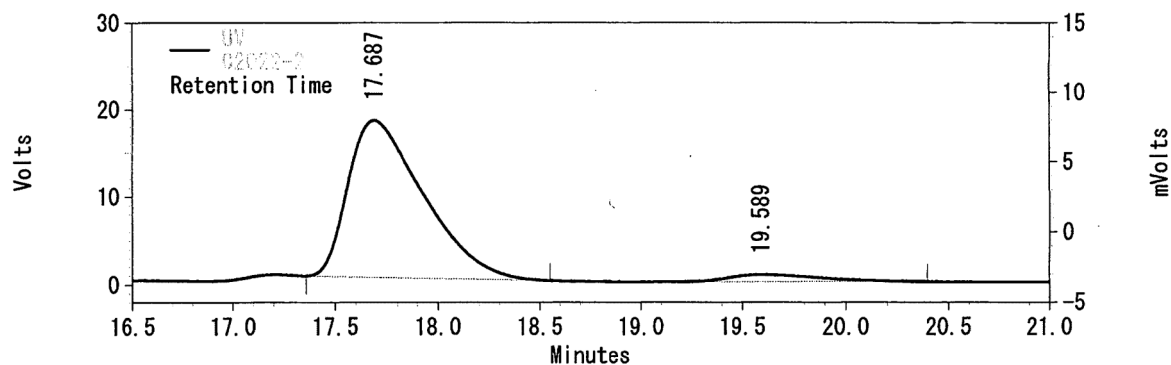

**UV Results**

| Pk #          | Retention Time | Area   | Area Percent | Height |
|---------------|----------------|--------|--------------|--------|
| 1             | 17.687         | 456227 | 95.021       | 17903  |
| 2             | 19.589         | 23906  | 4.979        | 799    |
| <b>Totals</b> |                | 480133 | 100.000      | 18702  |

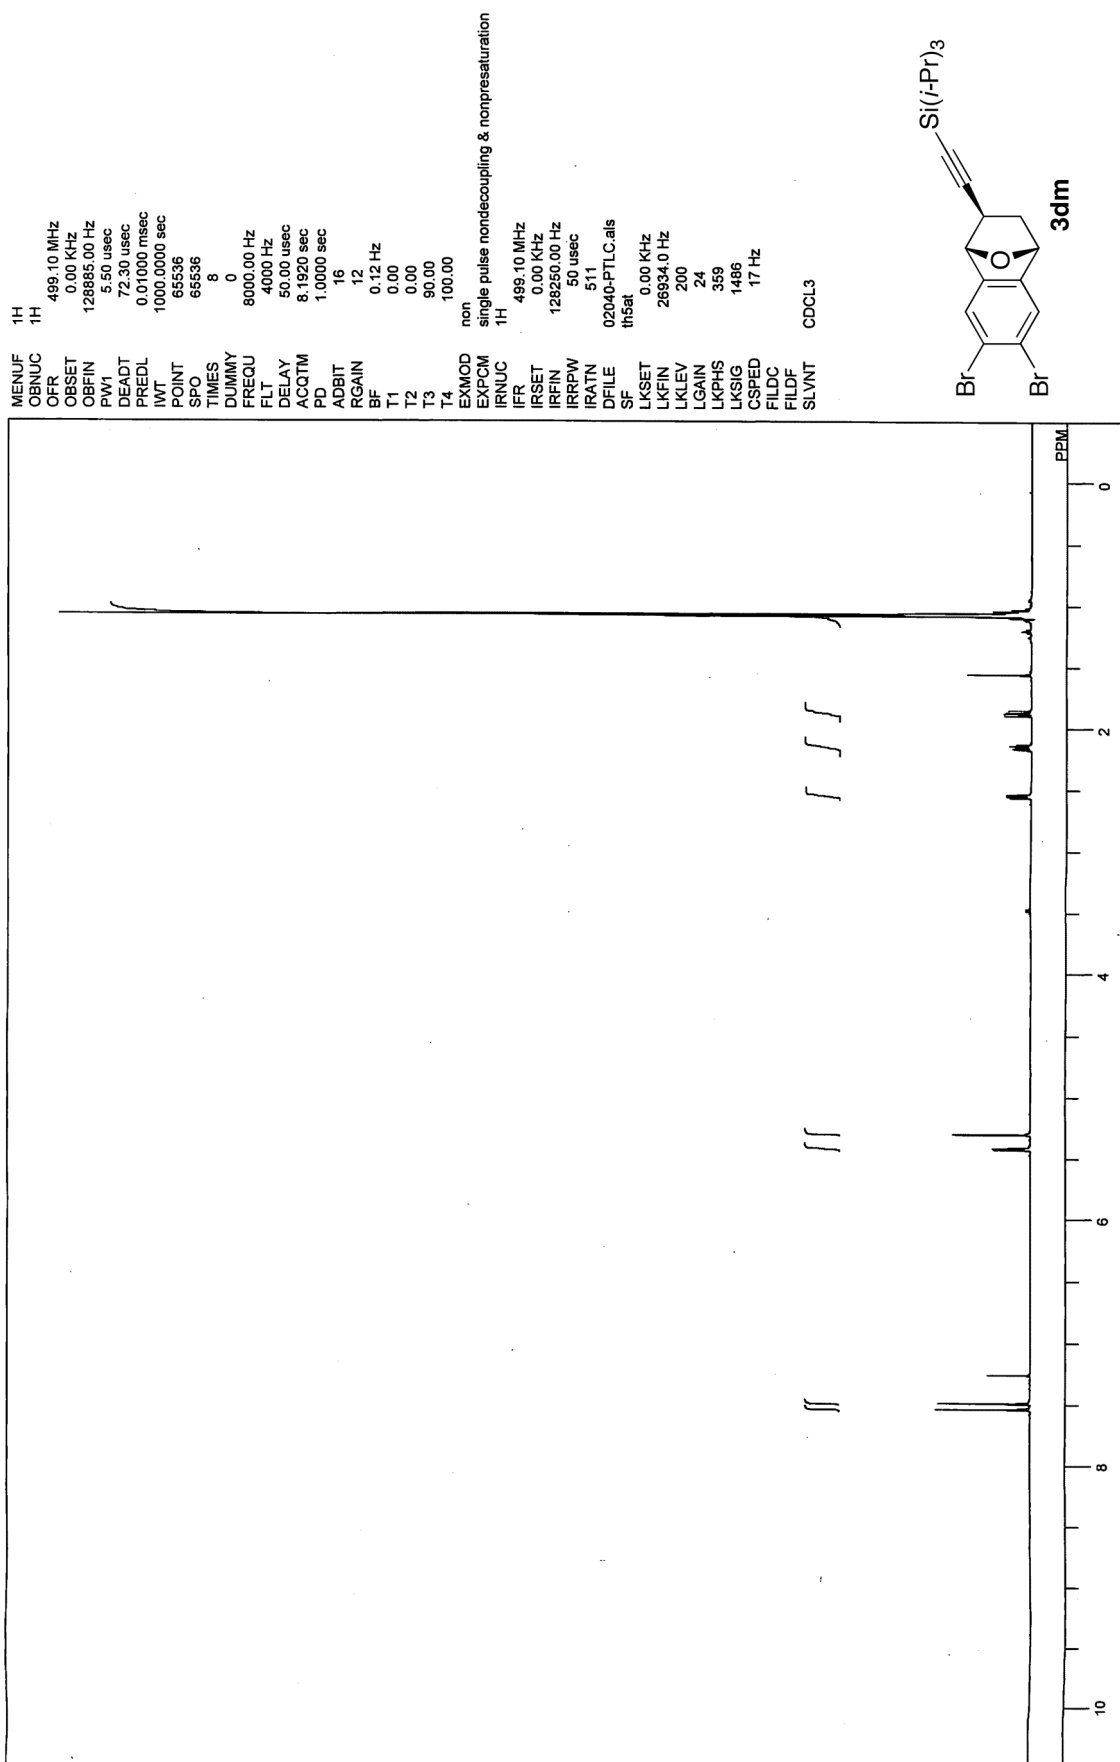

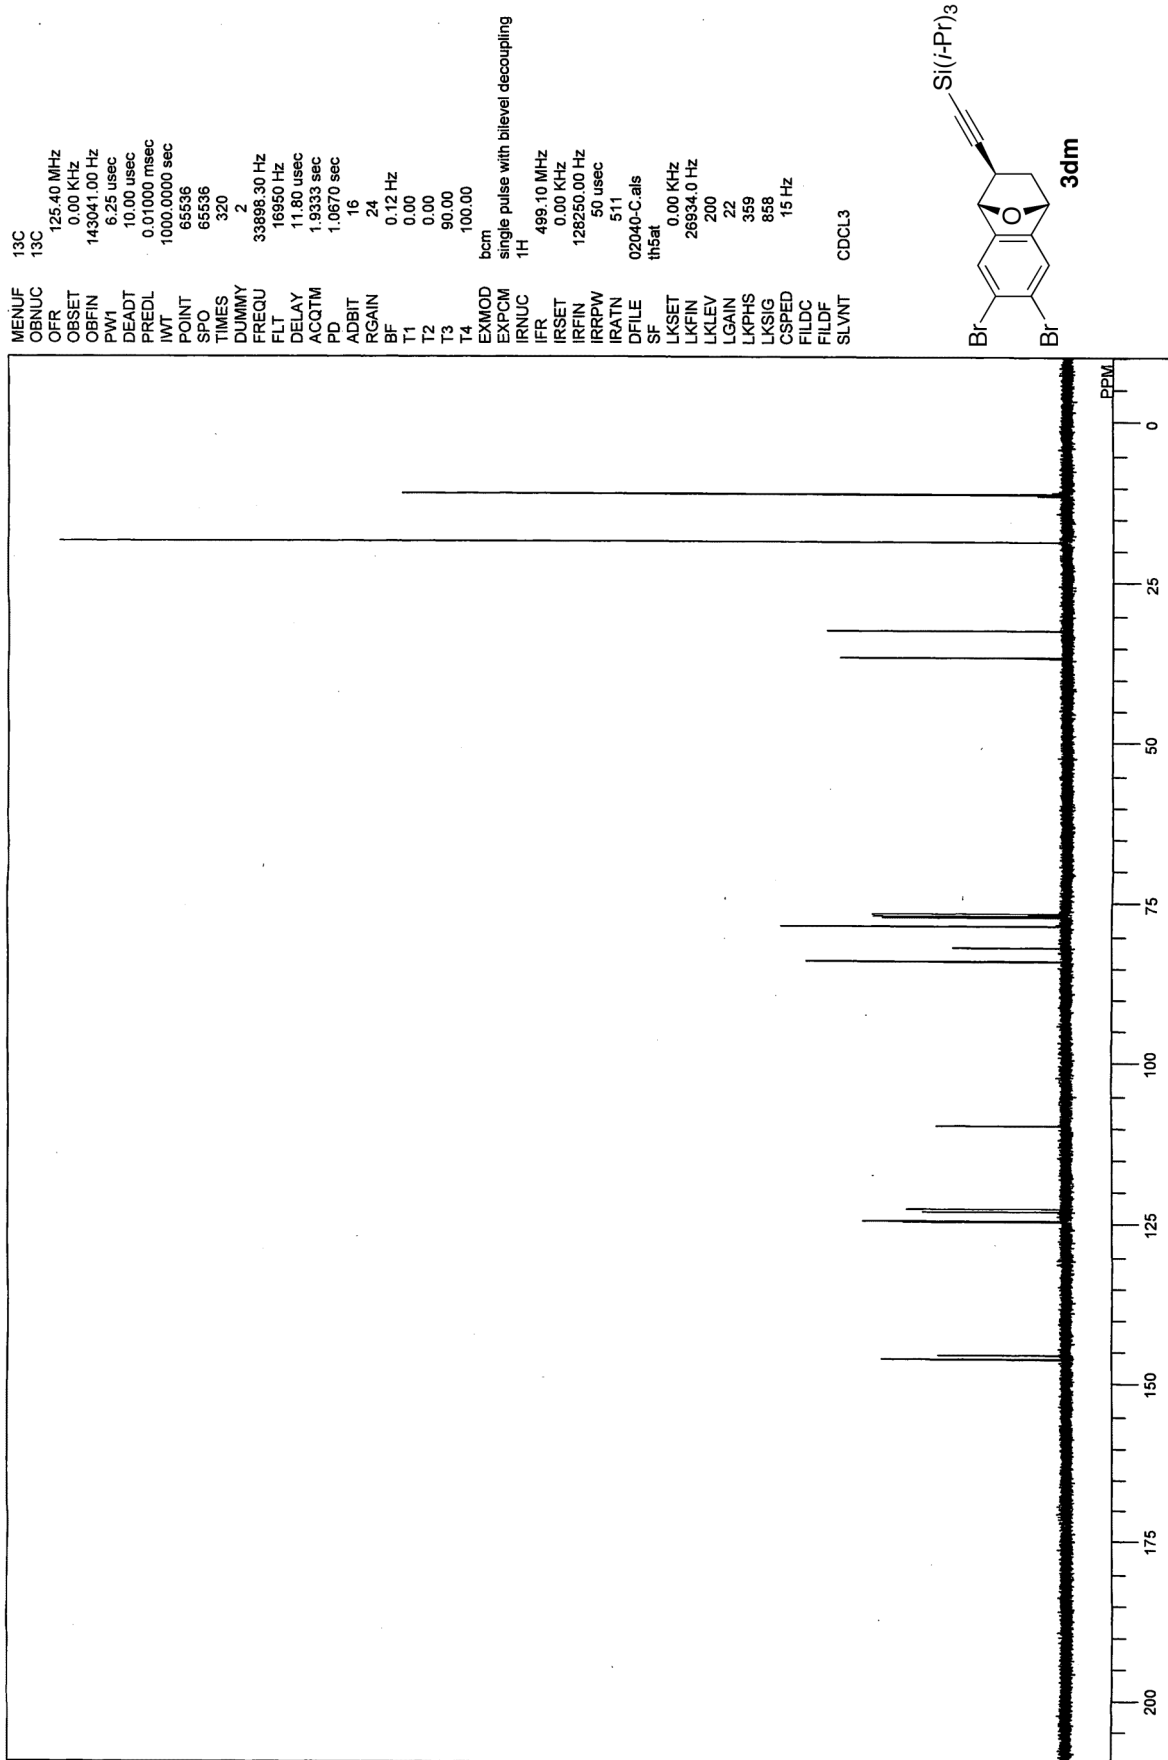

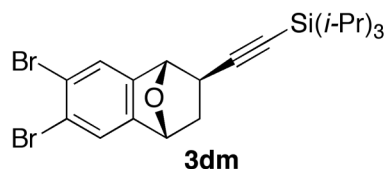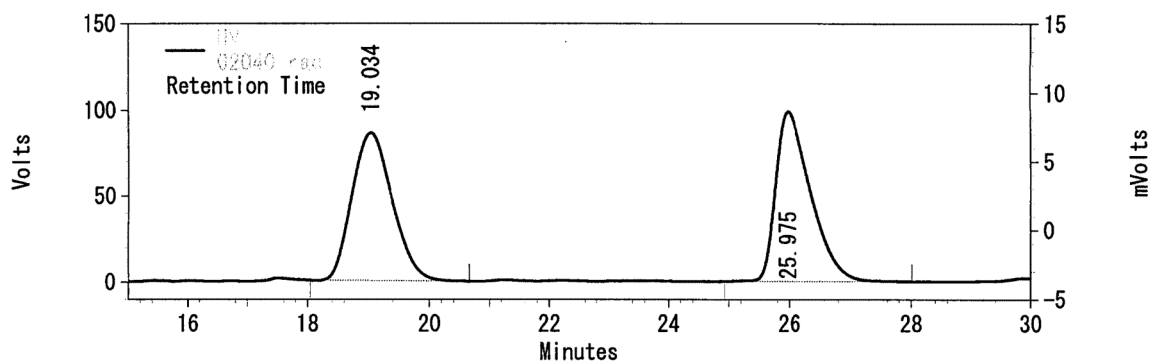

**UV Results**

| Pk #          | Retention Time | Area    | Area Percent | Height |
|---------------|----------------|---------|--------------|--------|
| 1             | 19.034         | 3971353 | 50.053       | 85892  |
| 2             | 25.975         | 3962952 | 49.947       | 98815  |
| <b>Totals</b> |                | 7934305 | 100.000      | 184707 |

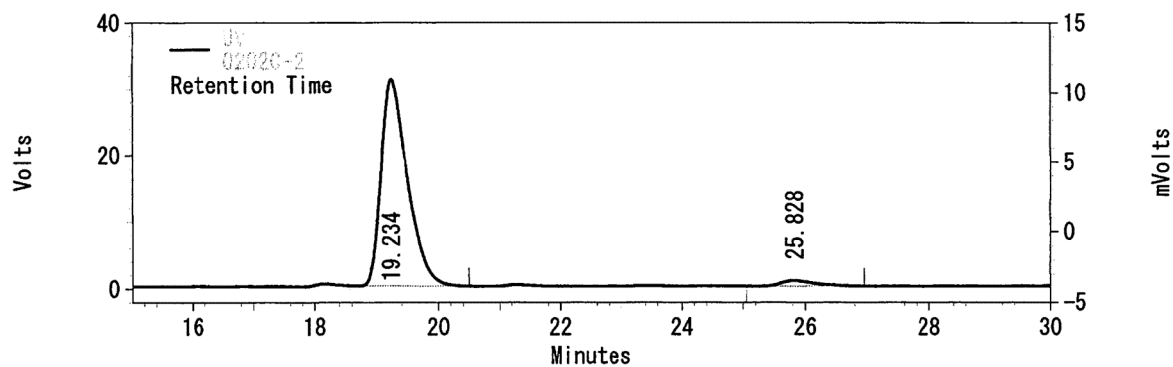

**UV Results**

| Pk #          | Retention Time | Area   | Area Percent | Height |
|---------------|----------------|--------|--------------|--------|
| 1             | 19.234         | 922014 | 96.788       | 31003  |
| 2             | 25.828         | 30594  | 3.212        | 825    |
| <b>Totals</b> |                | 952608 | 100.000      | 31828  |

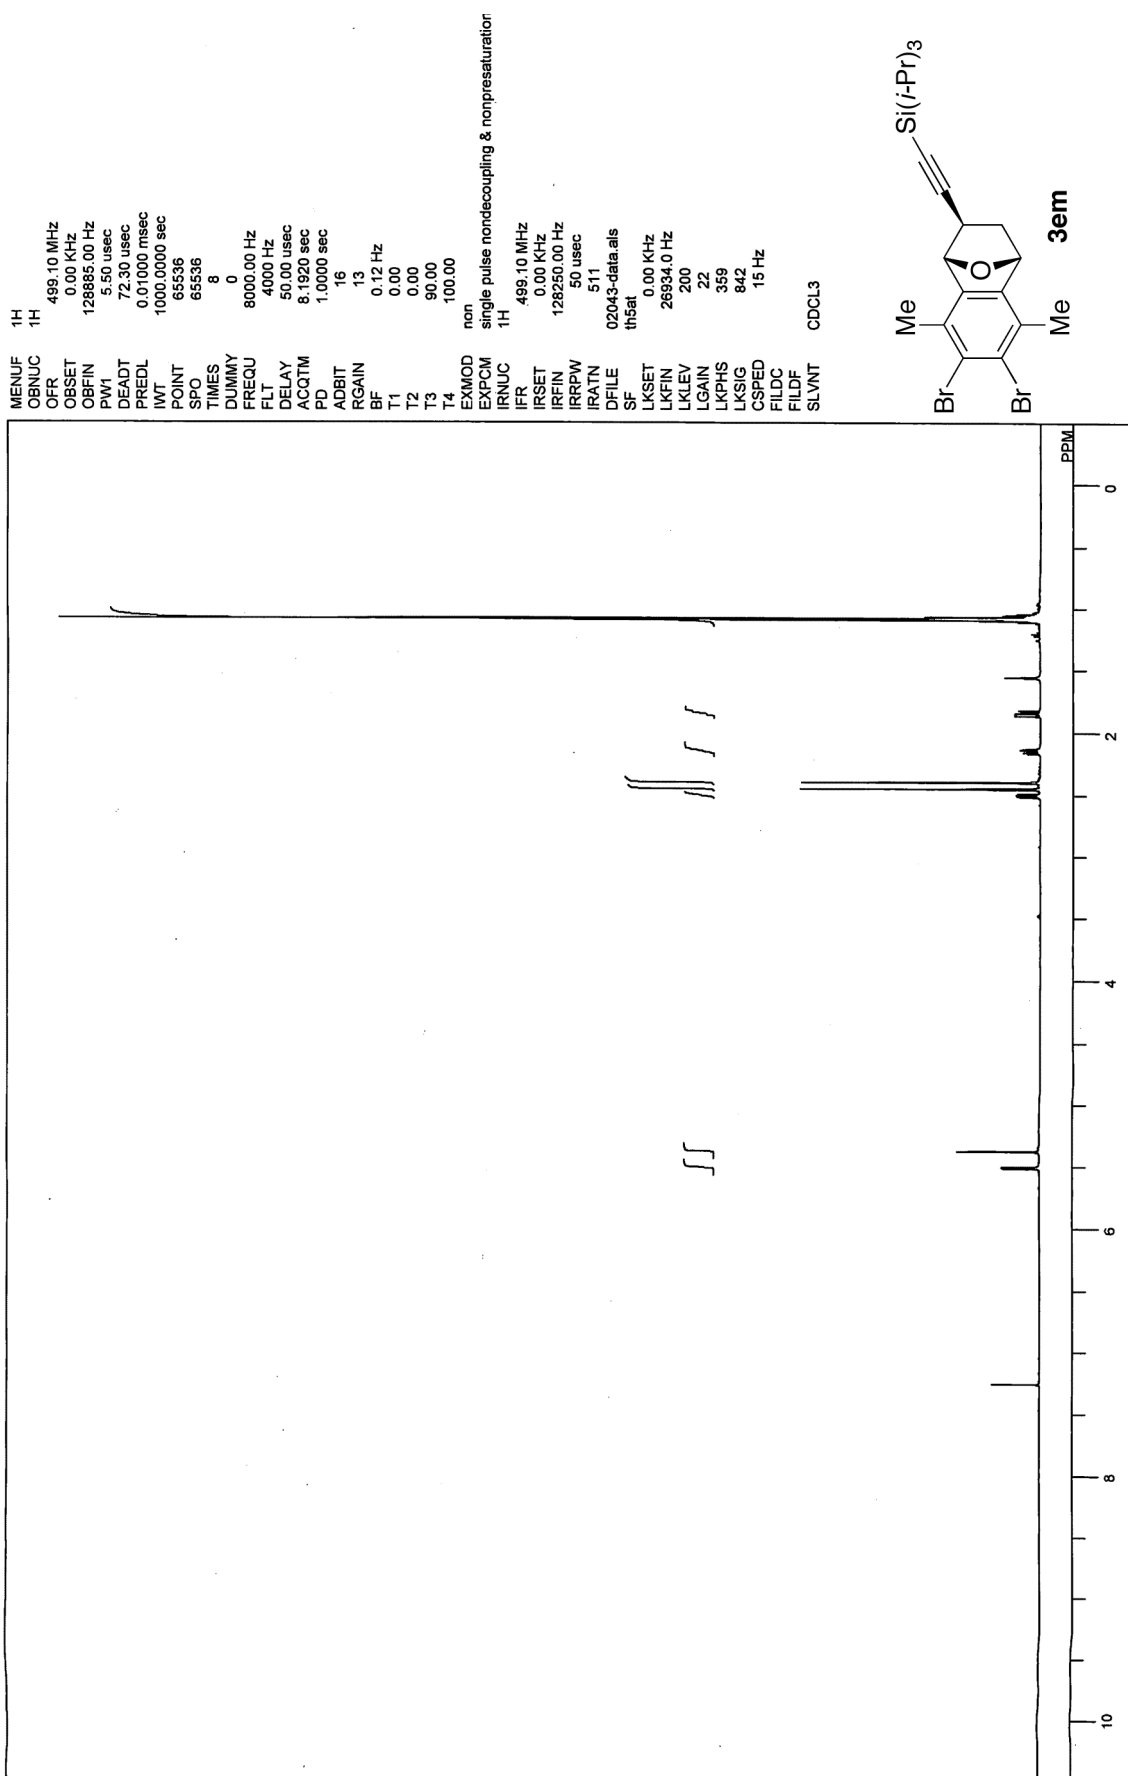



13C  
 13C  
 125.40 MHz  
 0.00 KHz  
 143041.00 Hz  
 6.25 usec  
 10.00 usec  
 0.01000 msec  
 1000.0000 sec  
 65536  
 65536  
 320  
 2  
 33898.30 Hz  
 16950 Hz  
 11.80 usec  
 1.9333 sec  
 1.0670 sec  
 16  
 24  
 0.12 Hz  
 0.00  
 0.00  
 90.00  
 100.00  
 bcm  
 single pulse with bilevel decoupling  
 1H  
 499.10 MHz  
 0.00 KHz  
 128250.00 Hz  
 50 usec  
 511  
 02043-C.als  
 th5at  
 SF  
 0.00 KHz  
 26834.0 Hz  
 200  
 21  
 359  
 640  
 13 Hz  
 CDCL3  
 CDCL3

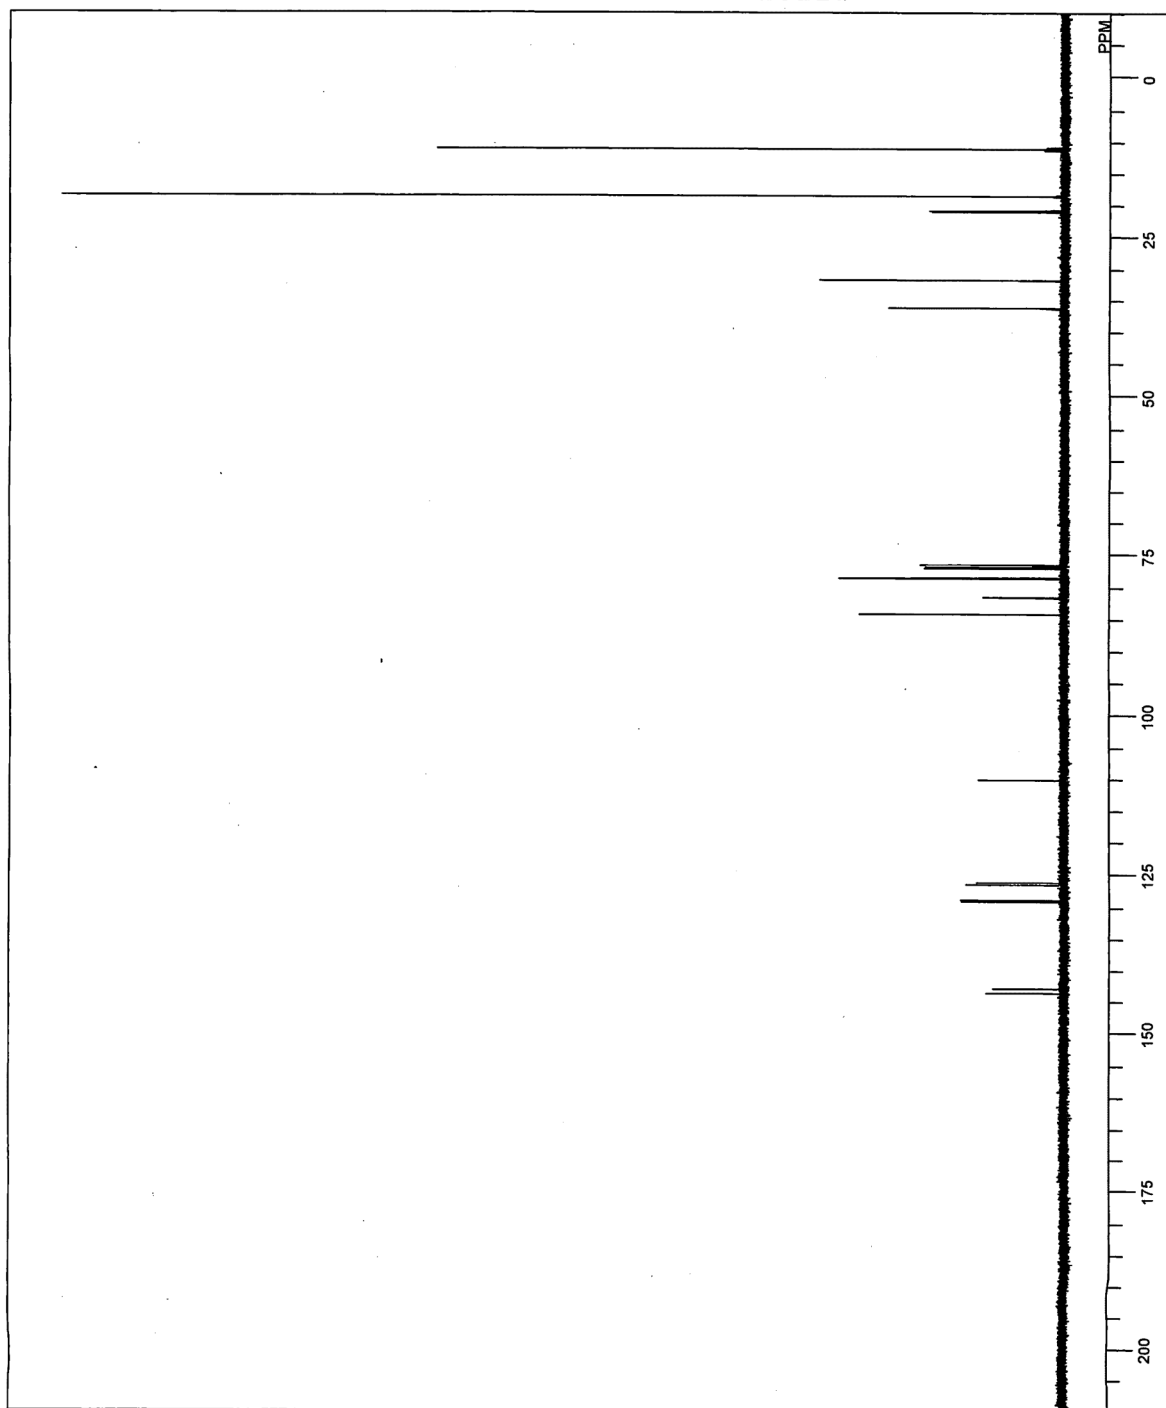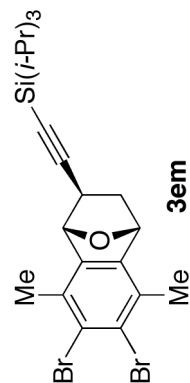

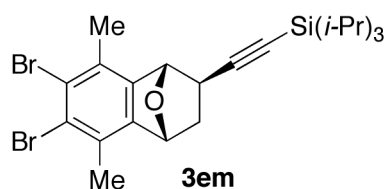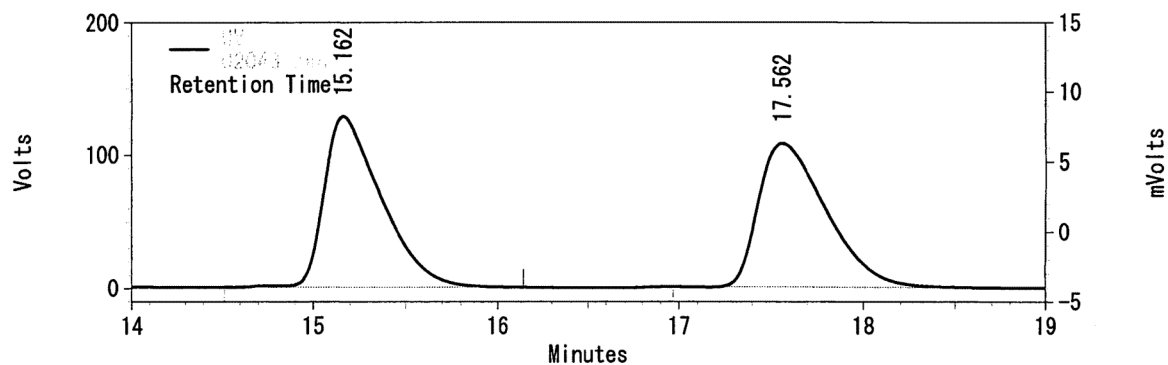

**UV Results**

| Pk #          | Retention Time | Area           | Area Percent   | Height        |
|---------------|----------------|----------------|----------------|---------------|
| 1             | 15.162         | 2764976        | 50.127         | 128010        |
| 2             | 17.562         | 2750974        | 49.873         | 107651        |
| <b>Totals</b> |                | <b>5515950</b> | <b>100.000</b> | <b>235661</b> |

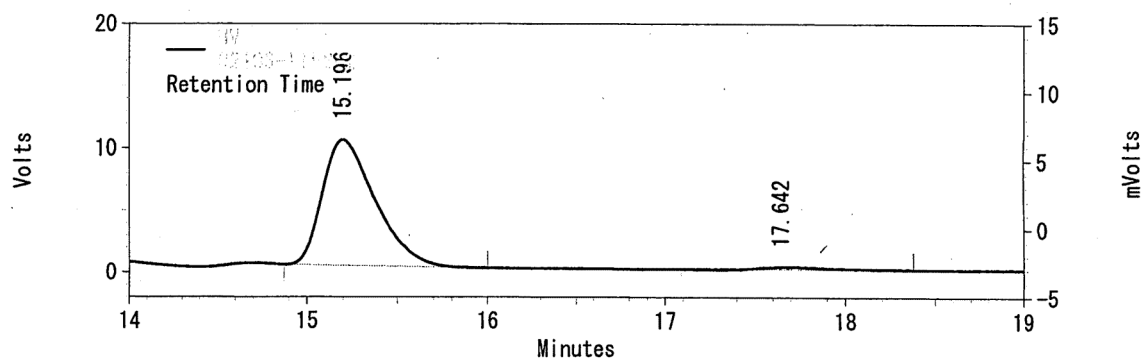

**UV Results**

| Pk #          | Retention Time | Area          | Area Percent   | Height       |
|---------------|----------------|---------------|----------------|--------------|
| 1             | 15.196         | 205241        | 97.271         | 10124        |
| 2             | 17.642         | 5758          | 2.729          | 223          |
| <b>Totals</b> |                | <b>210999</b> | <b>100.000</b> | <b>10347</b> |

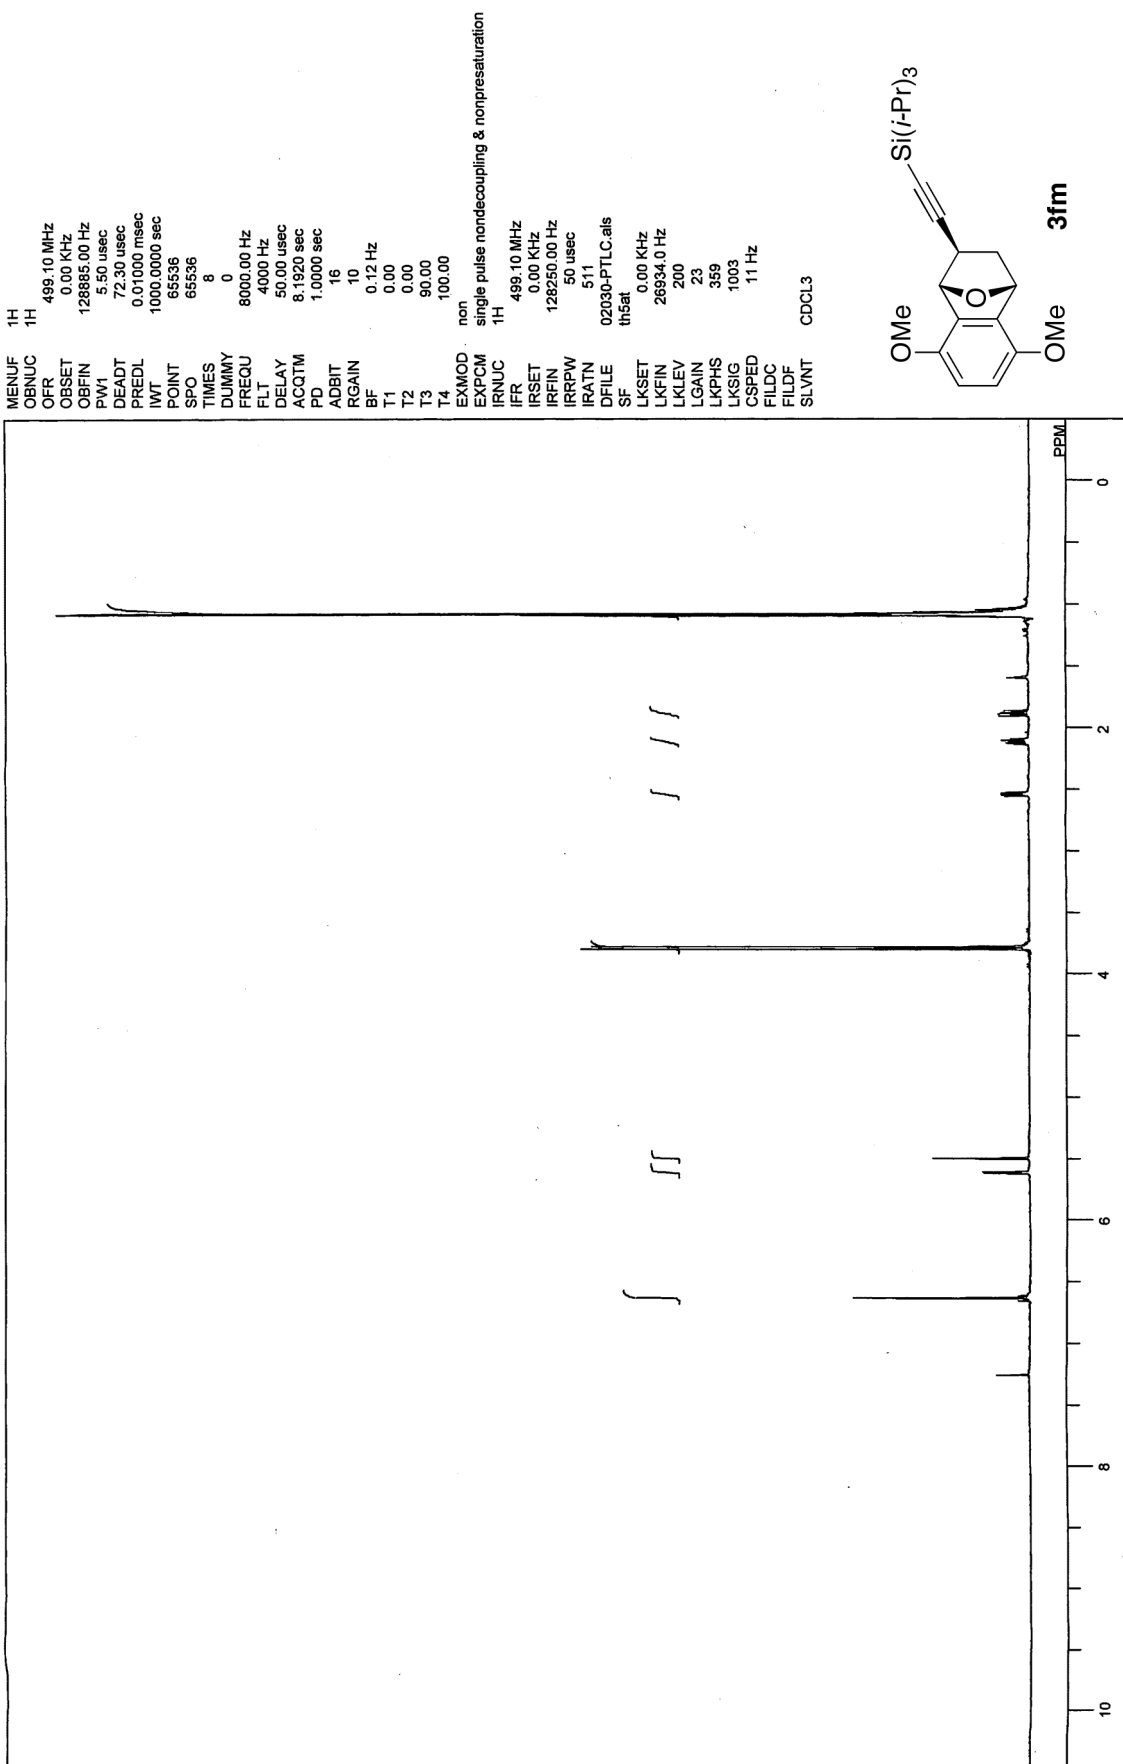

MENUF 13C  
OBNJUC 13C  
OFR 125.40 MHz  
OBSET 0.00 KHz  
OBFIN 143041.00 Hz  
PW1 6.25 usec  
DEADT 10.00 usec  
PREDL 0.01000 msec  
IWT 1000.0000 sec  
POINT 65536  
SPO 65536  
TIMES 320  
DUMMY 2  
FREQ 33898.30 Hz  
FLT 16950 Hz  
DELAY 11.80 usec  
ACQTM 1.9333 sec  
PD 1.0670 sec  
ADBIT 16  
RGAIN 23  
BF 0.12 Hz  
T1 0.00  
T2 0.00  
T3 90.00  
T4 100.00  
EXMOD bcm  
EXPCM single pulse with bilevel decoupling  
IRNUC 1H  
IFR 499.10 MHz  
IRSET 0.00 KHz  
IRFIN 128250.00 Hz  
IRRPW 50 usec  
IRATN 511  
DFILE 02012-C.als  
SF th5at  
LKSET 0.00 KHz  
LKFIN 26934.0 Hz  
LKLEV 200  
LGAIN 22  
LKPHS 359  
LKSIG 773  
CSPED 16 Hz  
FILDC  
FILDF  
SLVNT CDCL3

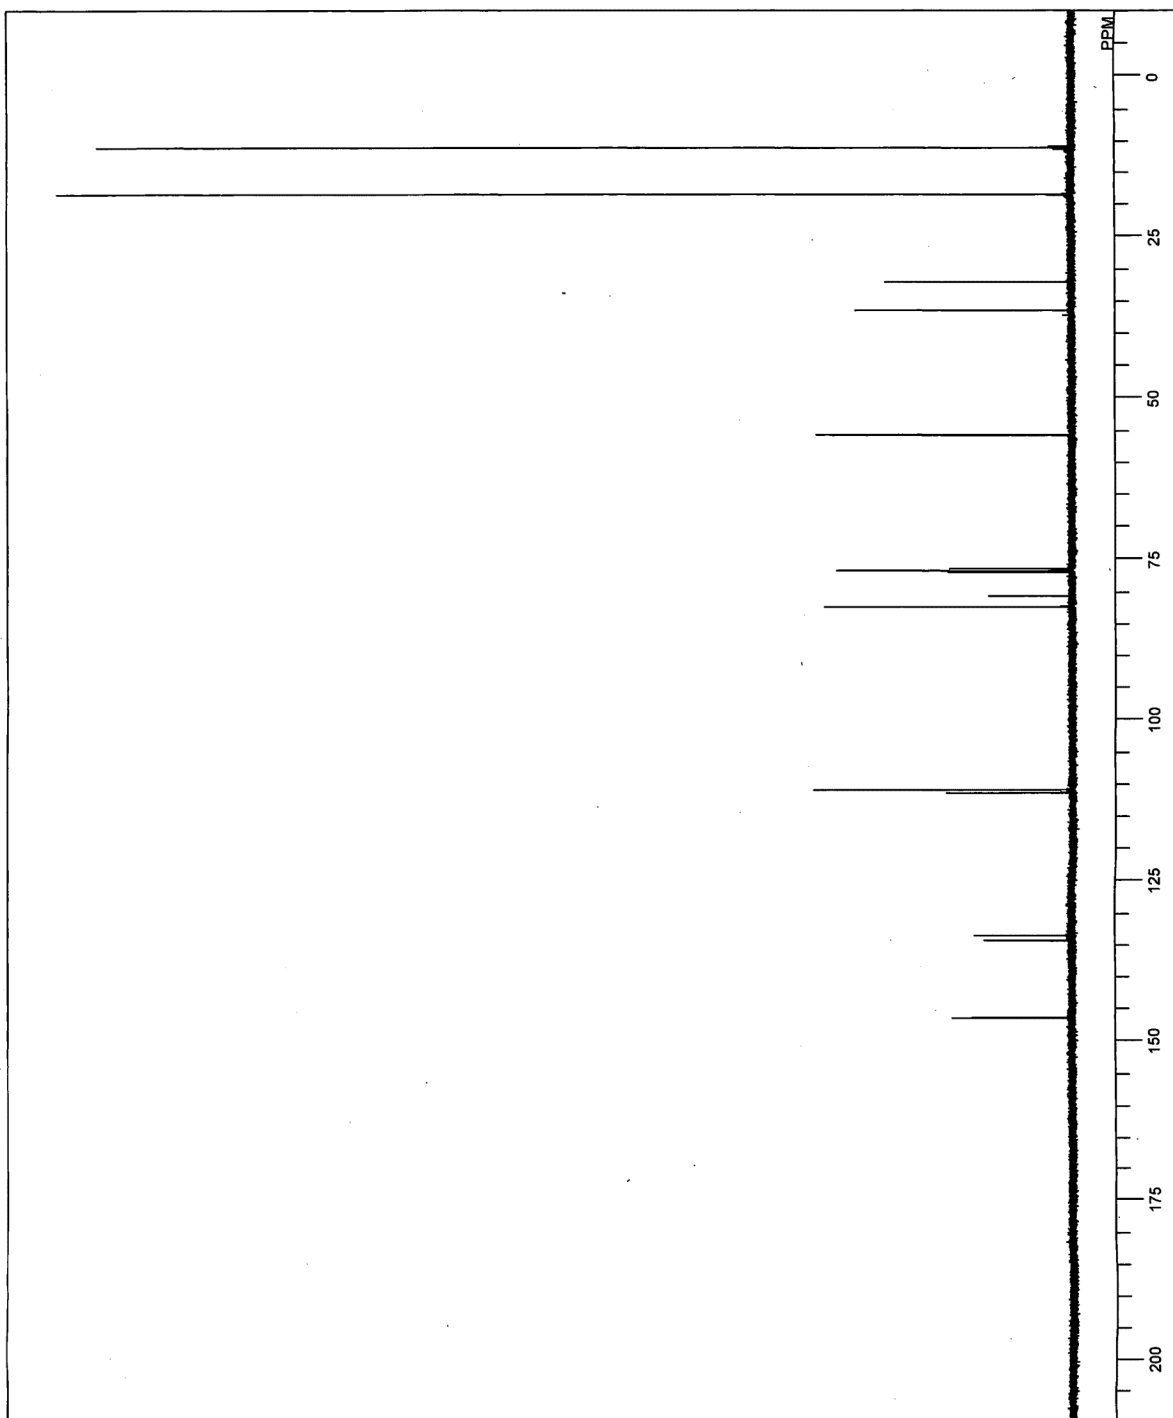

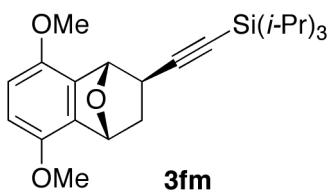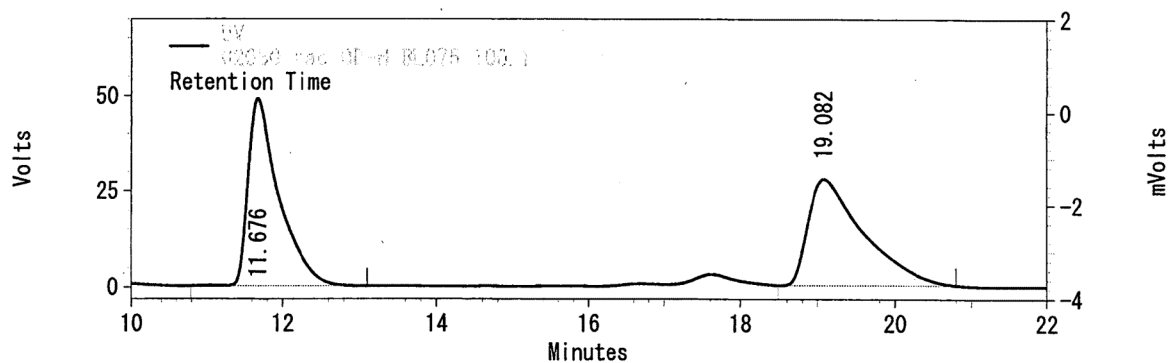

**UV Results**

| Pk #          | Retention Time | Area    | Area Percent | Height |
|---------------|----------------|---------|--------------|--------|
| 1             | 11.676         | 1367321 | 49.867       | 48890  |
| 2             | 19.082         | 1374616 | 50.133       | 27611  |
| <b>Totals</b> |                | 2741937 | 100.000      | 76501  |

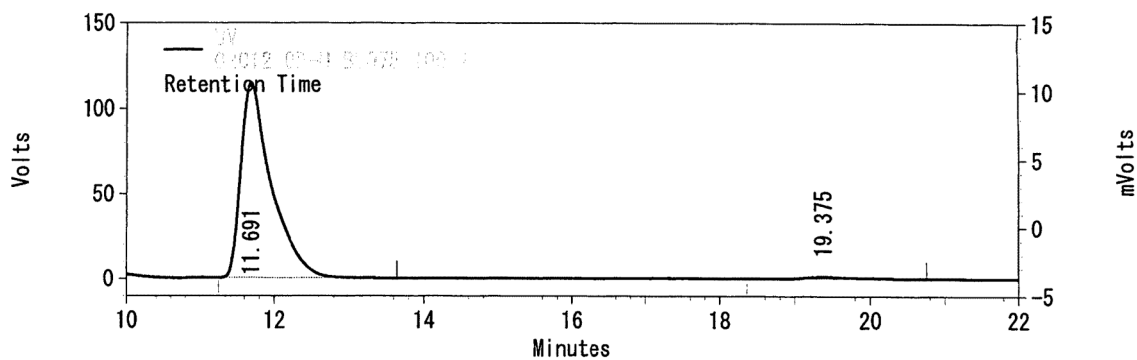

**UV Results**

| Pk #          | Retention Time | Area    | Area Percent | Height |
|---------------|----------------|---------|--------------|--------|
| 1             | 11.691         | 3270963 | 98.660       | 114636 |
| 2             | 19.375         | 44419   | 1.340        | 1059   |
| <b>Totals</b> |                | 3315382 | 100.000      | 115695 |

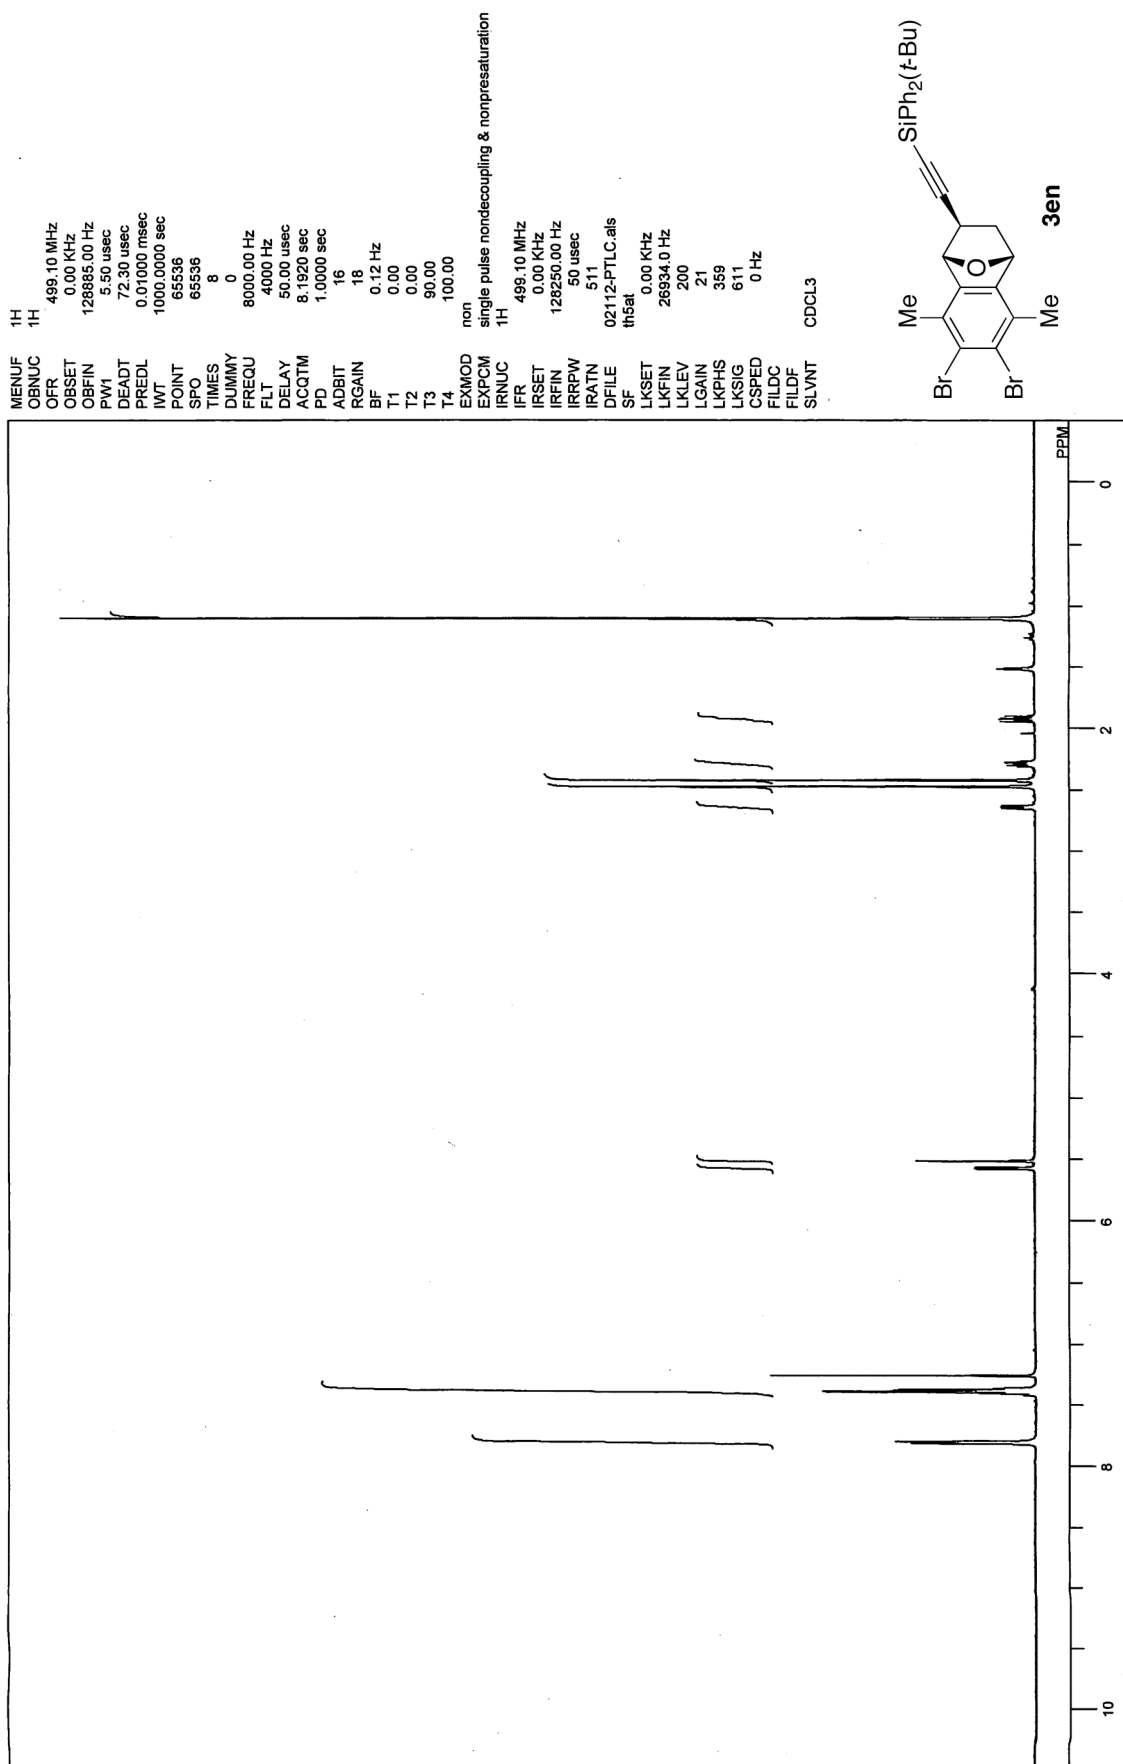

MENUF 13C  
OBNUC 13C  
OFR 125.40 MHz  
OBSET 0.00 KHz  
OBFIN 143041.00 Hz  
PW1 6.25 usec  
DEADT 10.00 usec  
PREDL 0.01000 msec  
IWT 1000.0000 sec  
POINT 65536  
SPO 65536  
TIMES 320  
DUMMY 2  
FREQU 33898.30 Hz  
FLT 16950 Hz  
DELAY 11.80 usec  
ACQTM 1.9333 sec  
PD 1.0670 sec  
ADBIT 16  
RGAIN 24  
BF 0.12 Hz  
T1 0.00  
T2 0.00  
T3 90.00  
T4 100.00  
EXMOD bcm  
EXPCM single pulse with bilevel decoupling  
IRNUC 1H  
IFR 499.10 MHz  
IRSET 0.00 KHz  
IRFIN 128250.00 Hz  
IRRPW 50 usec  
IRATN 511  
DFILE 02112-C(4).ais  
SF th5at  
LKSET 0.00 KHz  
LKFIN 26834.0 Hz  
LKLEV 200  
LGAIN 26  
LKPHS 359  
LKSIG 1347  
CSPED 15 Hz  
FILDC  
FILDF  
SLVNT CDCL3

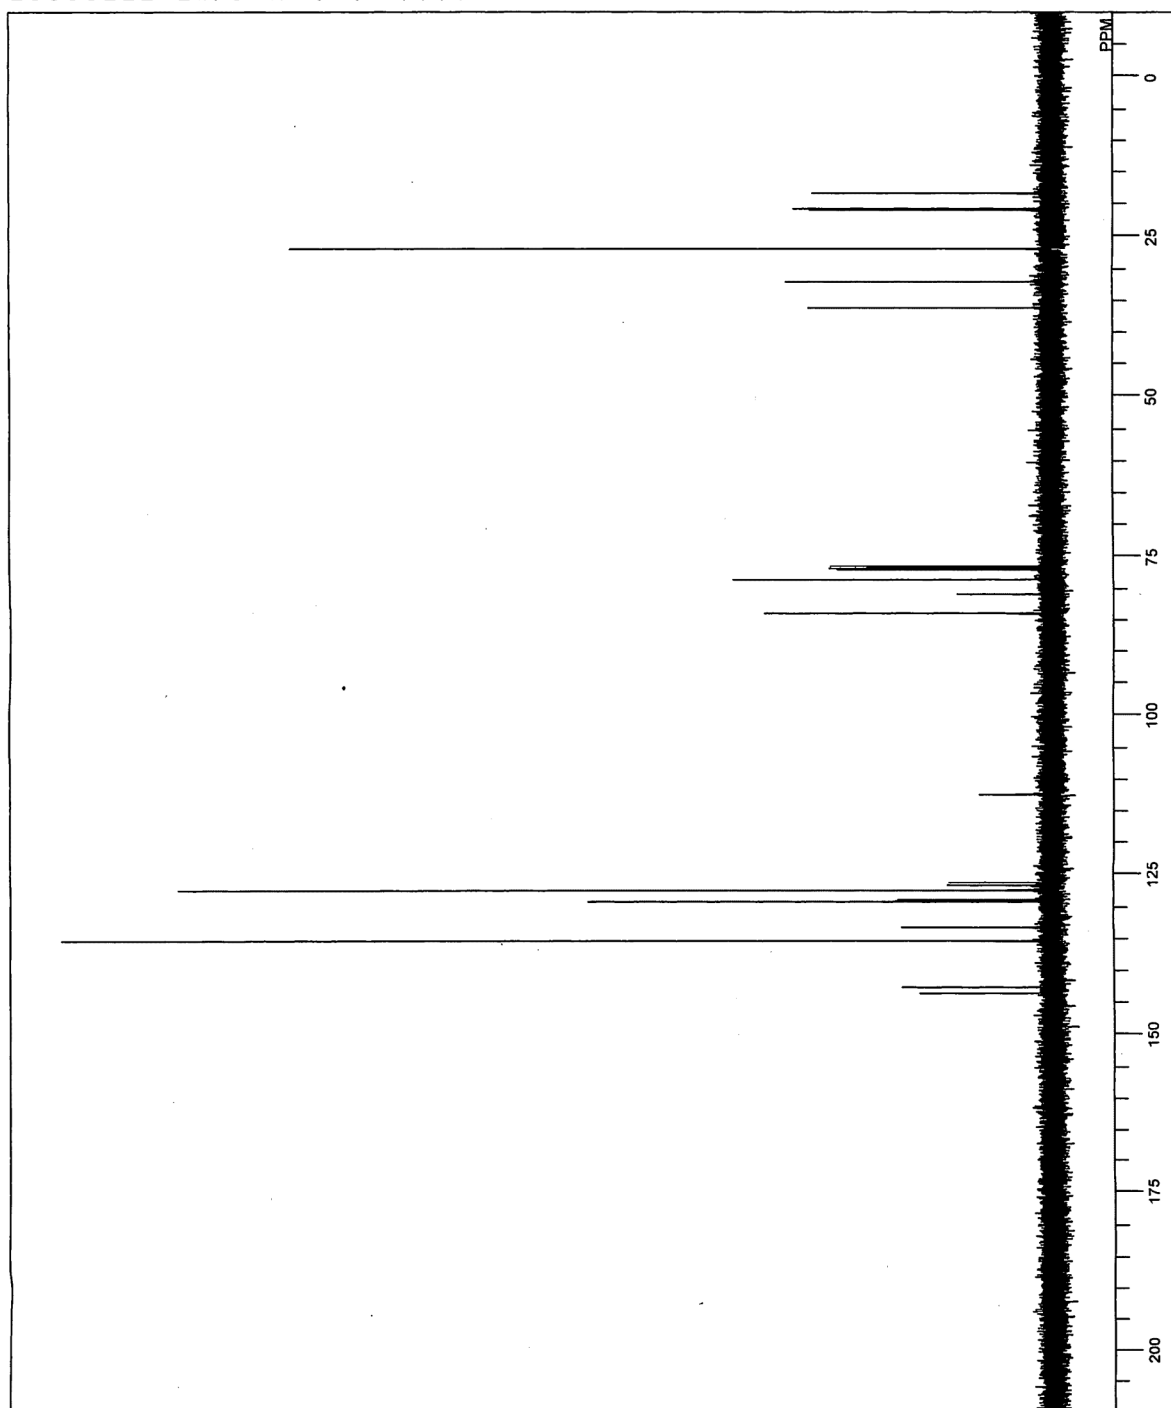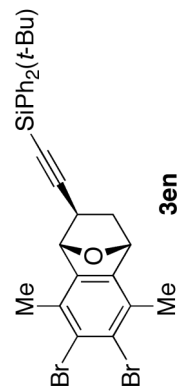

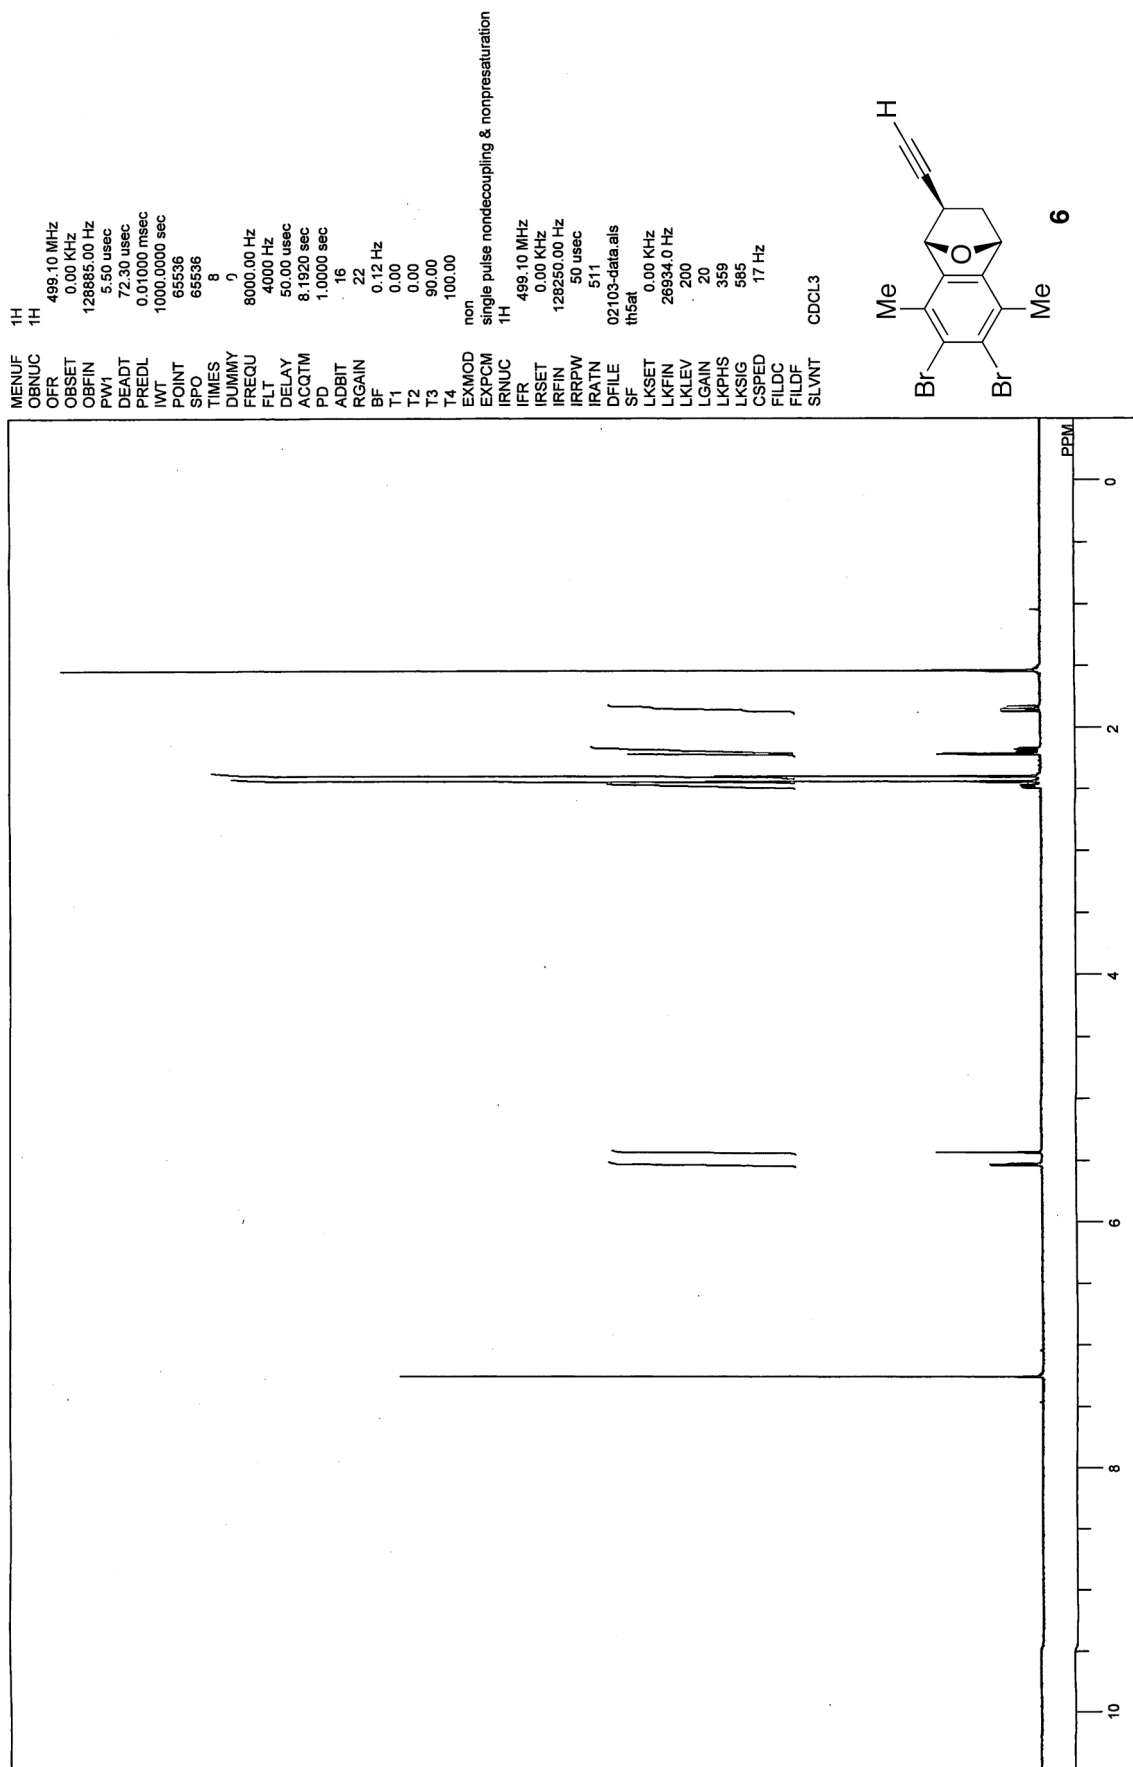



MENUF 13C  
OBRUC 13C  
OFR 125.40 MHz  
OBSET 0.00 KHz  
OBFIN 143041.00 Hz  
PW1 6.25 usec  
DEADT 10.00 usec  
PREDL 0.01000 msec  
IWT 1000.0000 sec  
POINT 65536  
SPO 65536  
TIMES 320  
DUMMY 2  
FREQU 33698.30 Hz  
FLT 16950 Hz  
DELAY 11.80 usec  
ACQTM 1.8333 sec  
PD 1.0670 sec  
ADBIT 16  
RGAIN 25  
BF 0.12 Hz  
T1 0.00  
T2 0.00  
T3 90.00  
T4 100.00  
EXMOD bcm  
EXPCM single pulse with bilevel decoupling  
IRNUC 1H  
IFR 499.10 MHz  
IRSET 0.00 KHz  
IRFIN 128250.00 Hz  
IRRPW 50 usec  
IRATN 511  
DFILE 02067-C(5).als  
SF th5at  
LKSET 0.00 KHz  
LKFIN 26934.0 Hz  
LKLEV 200  
LGAIN 22  
LKPHS 359  
LKSIG 694  
CSPED 15 Hz  
FILDC  
FILDF  
SLVNT CDCL3

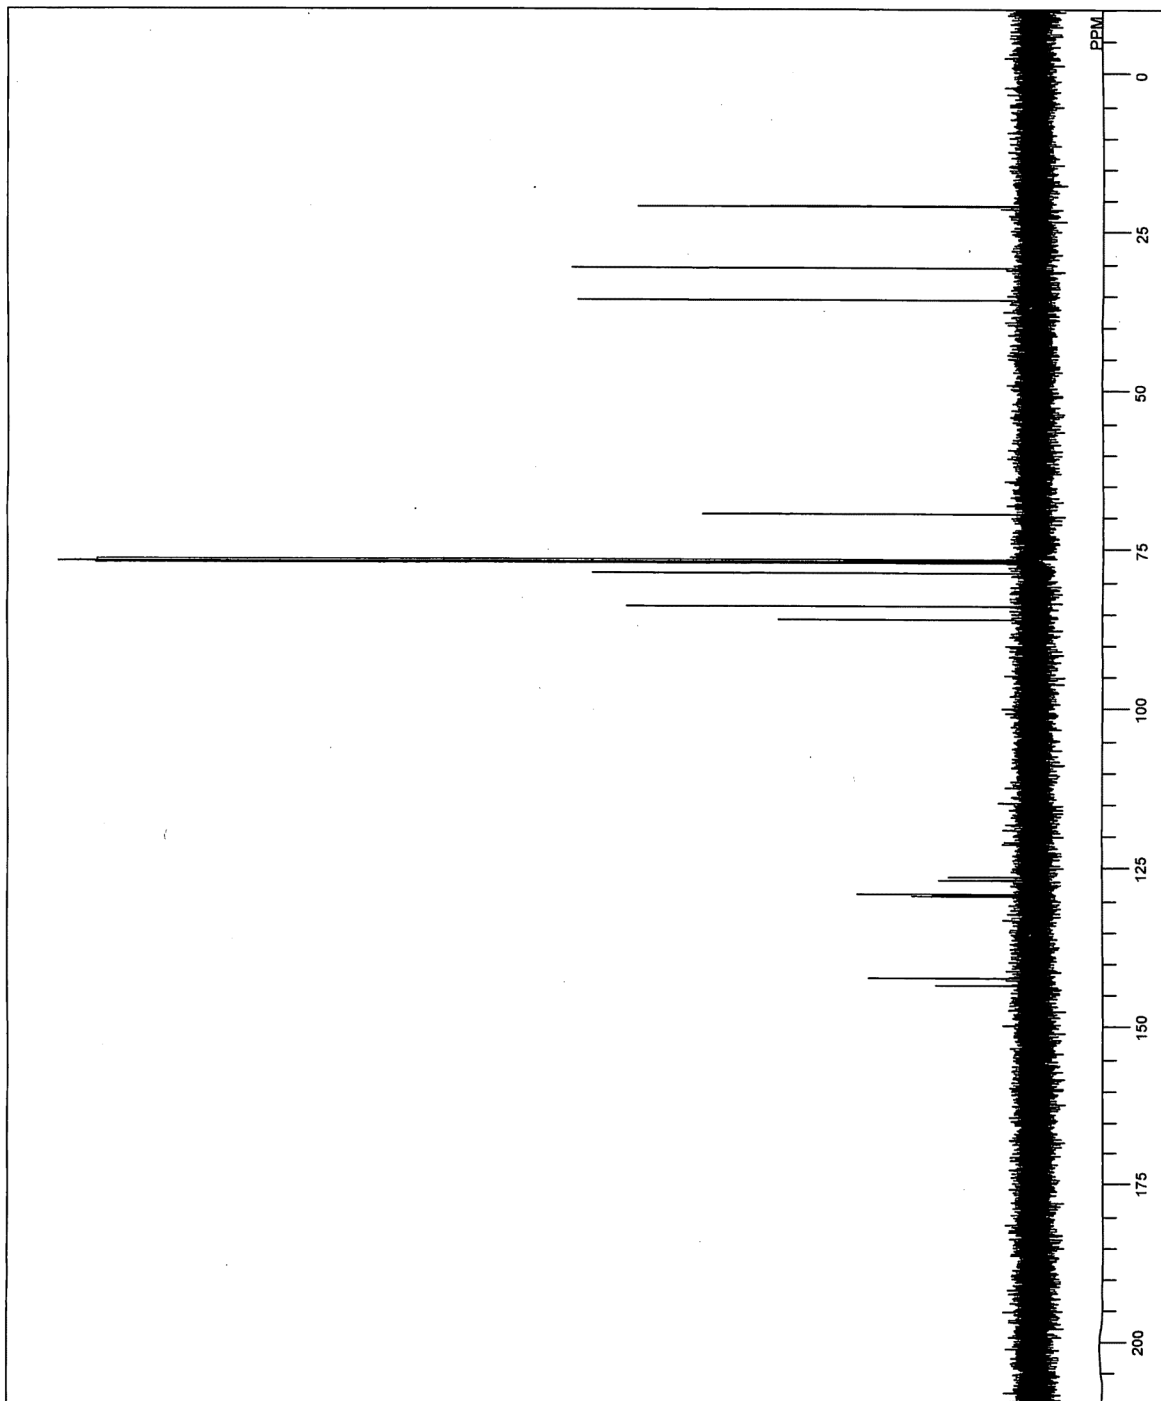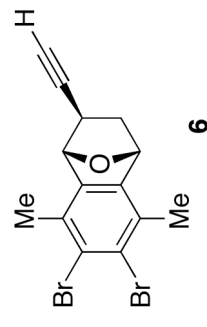

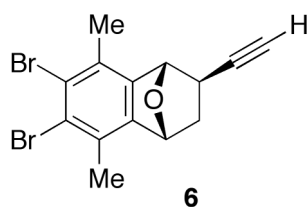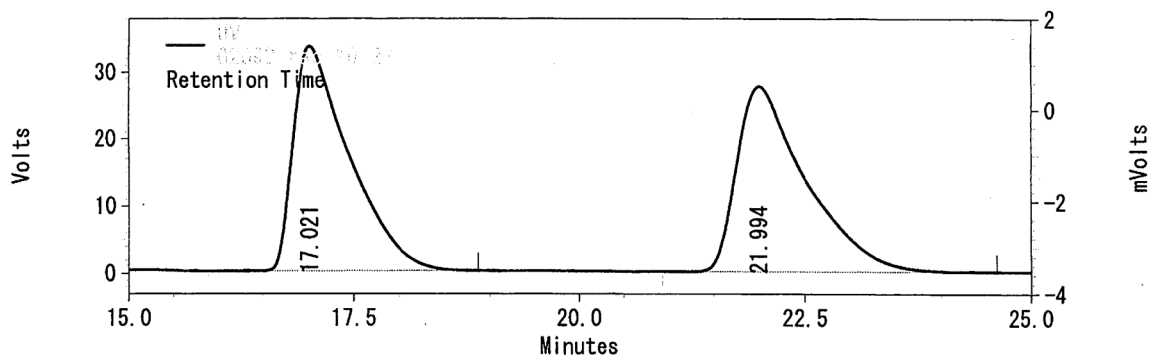

**UV Results**

| Pk #          | Retention Time | Area           | Area Percent   | Height       |
|---------------|----------------|----------------|----------------|--------------|
| 1             | 17.021         | 1433486        | 49.883         | 33469        |
| 2             | 21.994         | 1440231        | 50.117         | 27586        |
| <b>Totals</b> |                | <b>2873717</b> | <b>100.000</b> | <b>61055</b> |

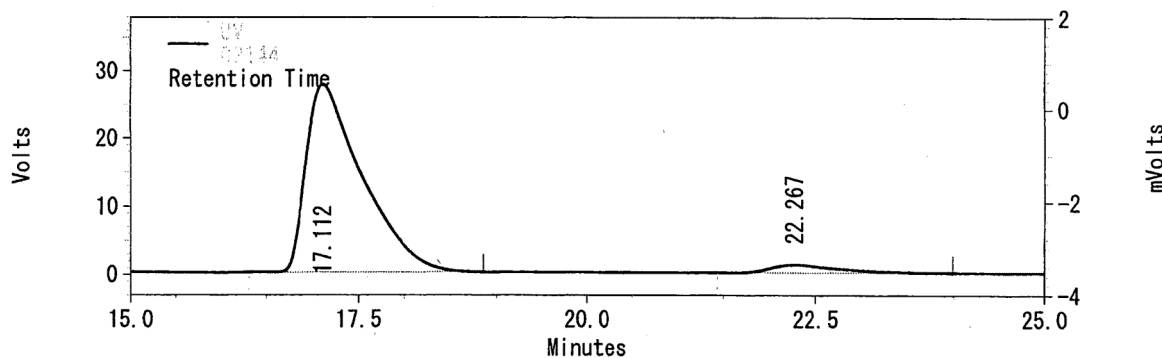

**UV Results**

| Pk #          | Retention Time | Area           | Area Percent   | Height       |
|---------------|----------------|----------------|----------------|--------------|
| 1             | 17.112         | 1165100        | 95.085         | 27662        |
| 2             | 22.267         | 60226          | 4.915          | 1194         |
| <b>Totals</b> |                | <b>1225326</b> | <b>100.000</b> | <b>28856</b> |

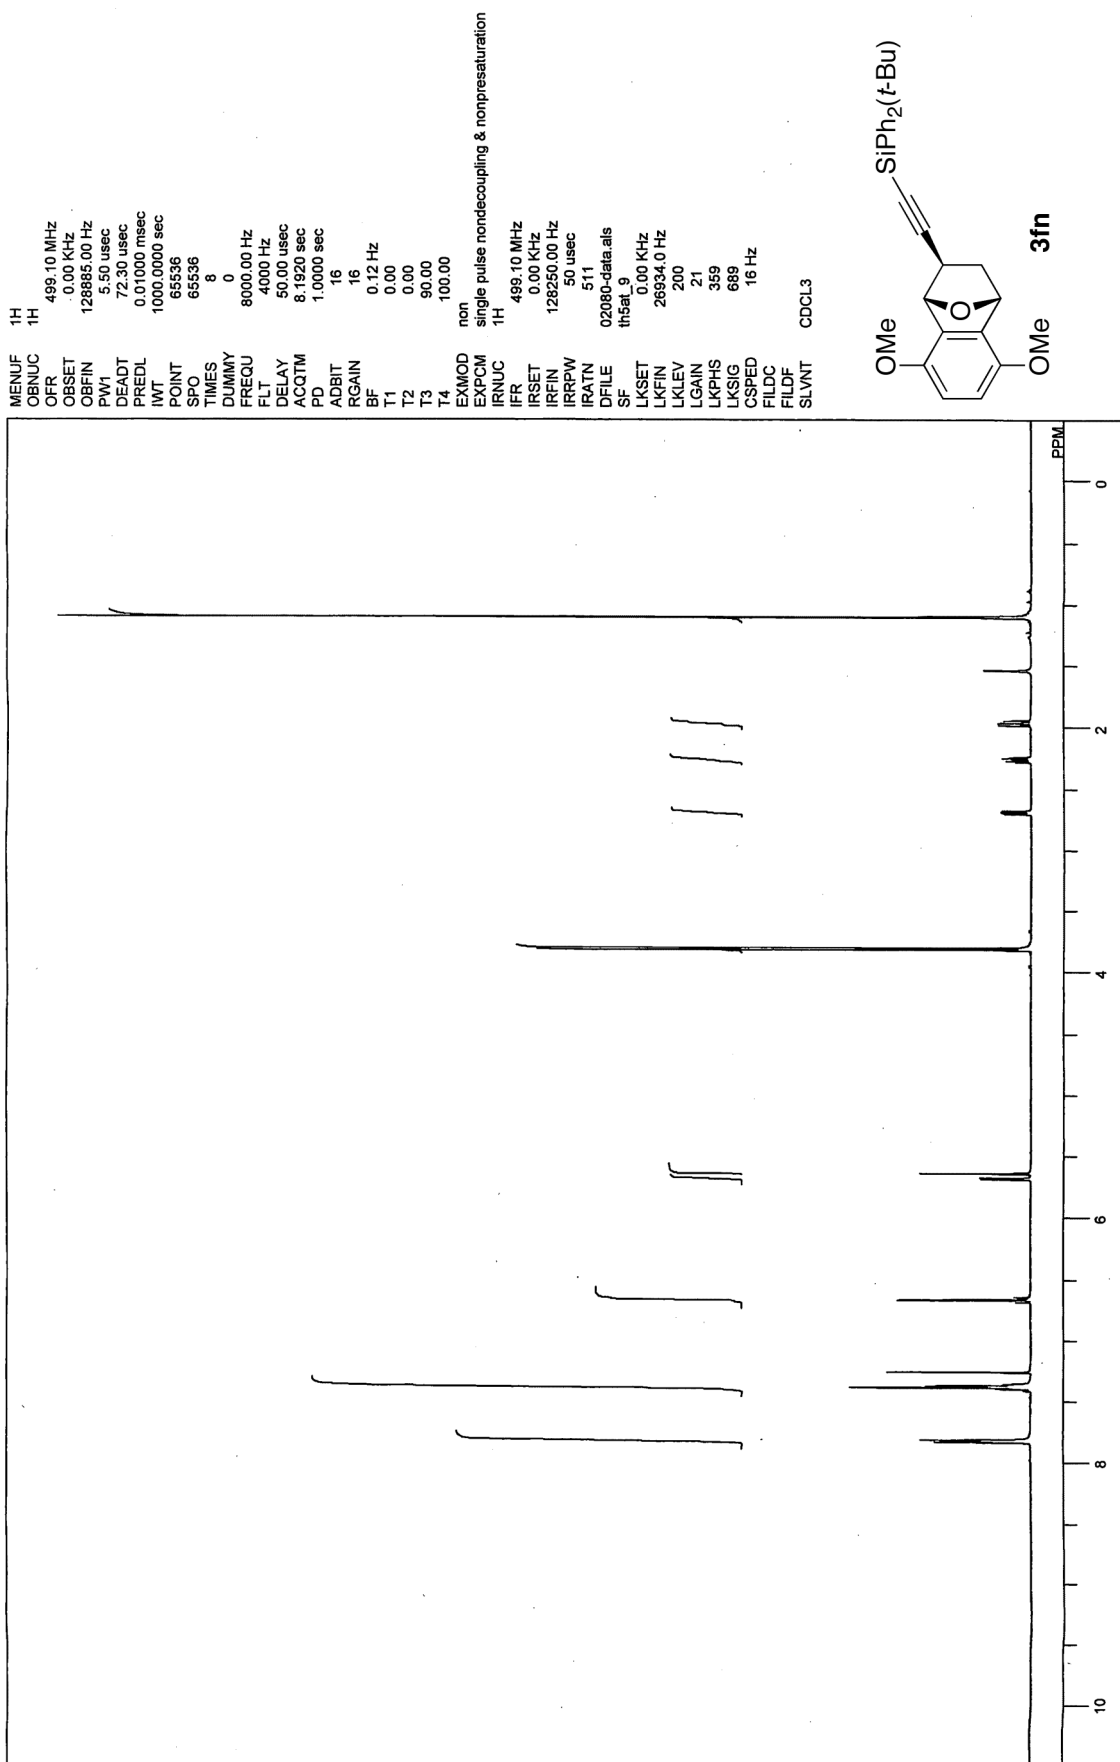

13C  
MENUMF 13C  
OBNUC 125.40 MHz  
OFR 0.00 KHz  
OBSET 143041.00 Hz  
ORFIN 6.25 usec  
PW1 10.00 usec  
DEADT 0.01000 msec  
PREDL 1000.0000 sec  
IWT 65536  
POINT 320  
SPO 2  
TIMES 33898.30 Hz  
DUMMY 16950 Hz  
FREQU 11.80 usec  
FLT 1.9333 sec  
DELAY 1.0670 sec  
ACCTM 16  
PD 25  
ADBIT 0.12 Hz  
RGAIN 0.00  
BF 0.00  
T1 90.00  
T2 100.00  
T3  
T4  
EXMOD bcm  
EXPCM single pulse with bilevel decoupling  
IRNUC 1H  
IFR 489.10 MHz  
IRSET 0.00 KHz  
IRFIN 128250.00 Hz  
IRRPW 50 usec  
IRATN 511  
DFILE th5at\_8  
SF 02080-C.als  
LKSET 0.00 KHz  
LKFIN 26934.0 Hz  
LKLEV 200  
LGAIN 23  
LKPHS 359  
LKSIG 980  
CSPED 16 Hz  
FILDC  
FILDF  
SLVNT CDCL3

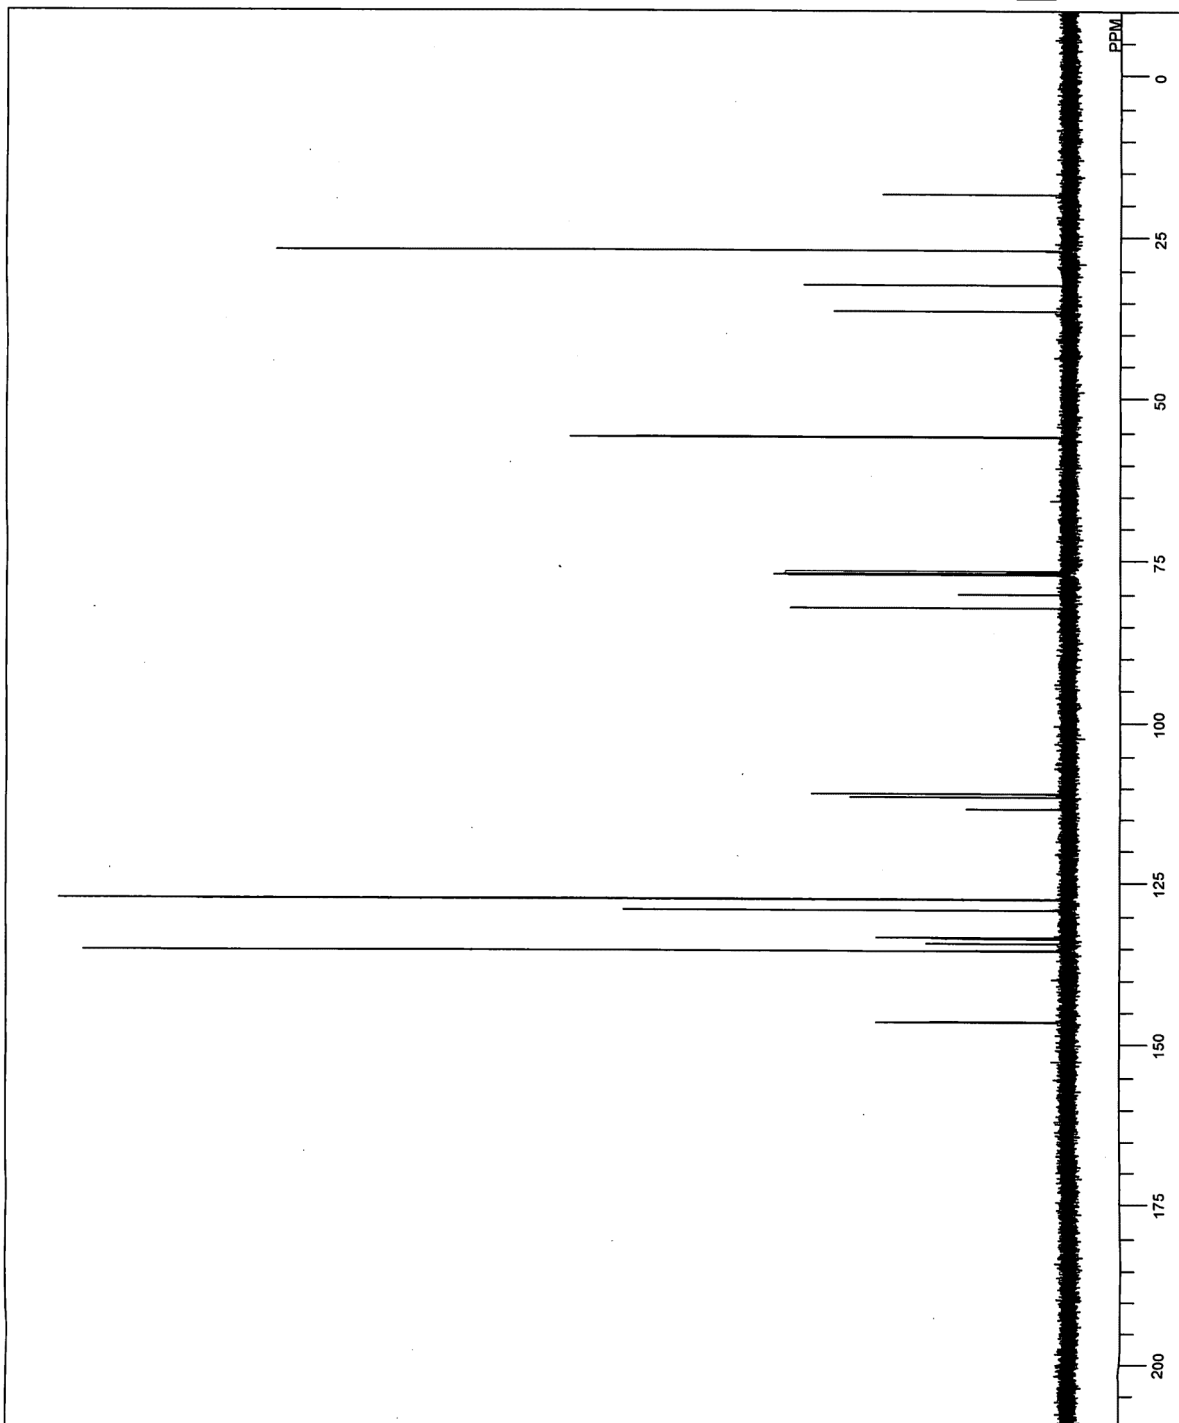

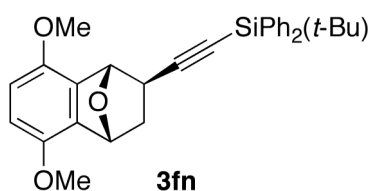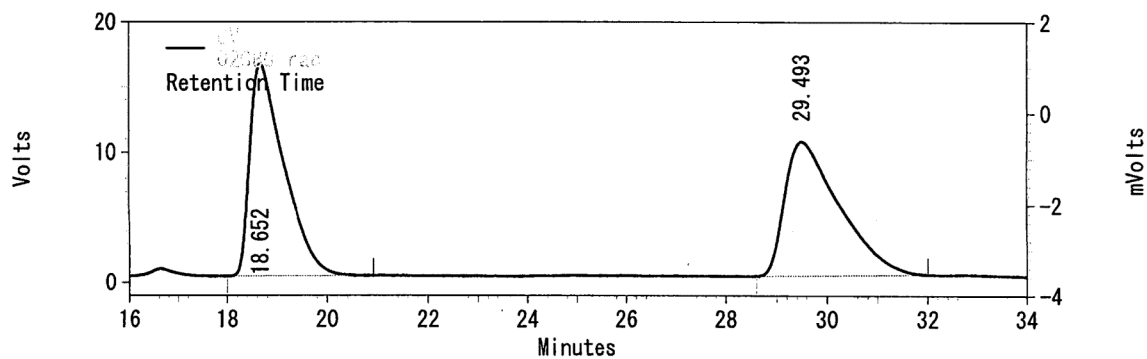

**UV Results**

| Pk #          | Retention Time | Area    | Area Percent | Height |
|---------------|----------------|---------|--------------|--------|
| 1             | 18.652         | 773406  | 49.769       | 16242  |
| 2             | 29.493         | 780594  | 50.231       | 10298  |
| <b>Totals</b> |                | 1554000 | 100.000      | 26540  |

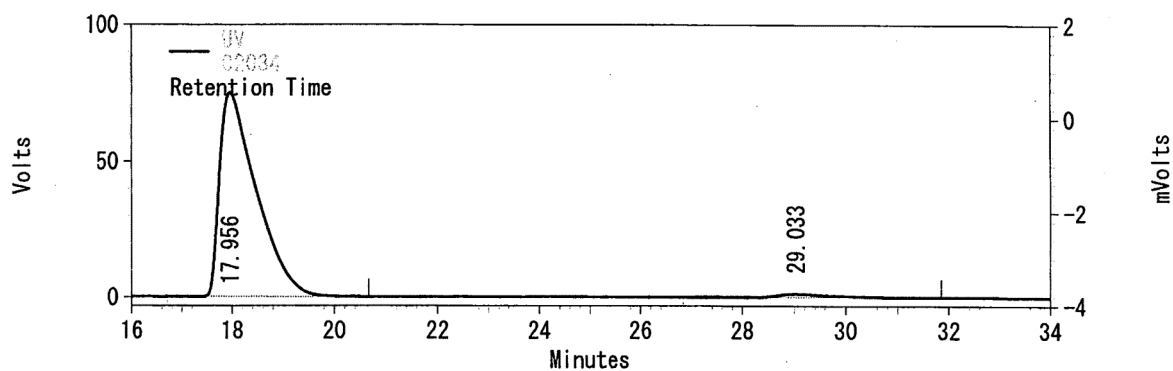

**UV Results**

| Pk #          | Retention Time | Area    | Area Percent | Height |
|---------------|----------------|---------|--------------|--------|
| 1             | 17.956         | 3759936 | 97.942       | 74914  |
| 2             | 29.033         | 79018   | 2.058        | 1228   |
| <b>Totals</b> |                | 3838954 | 100.000      | 76142  |

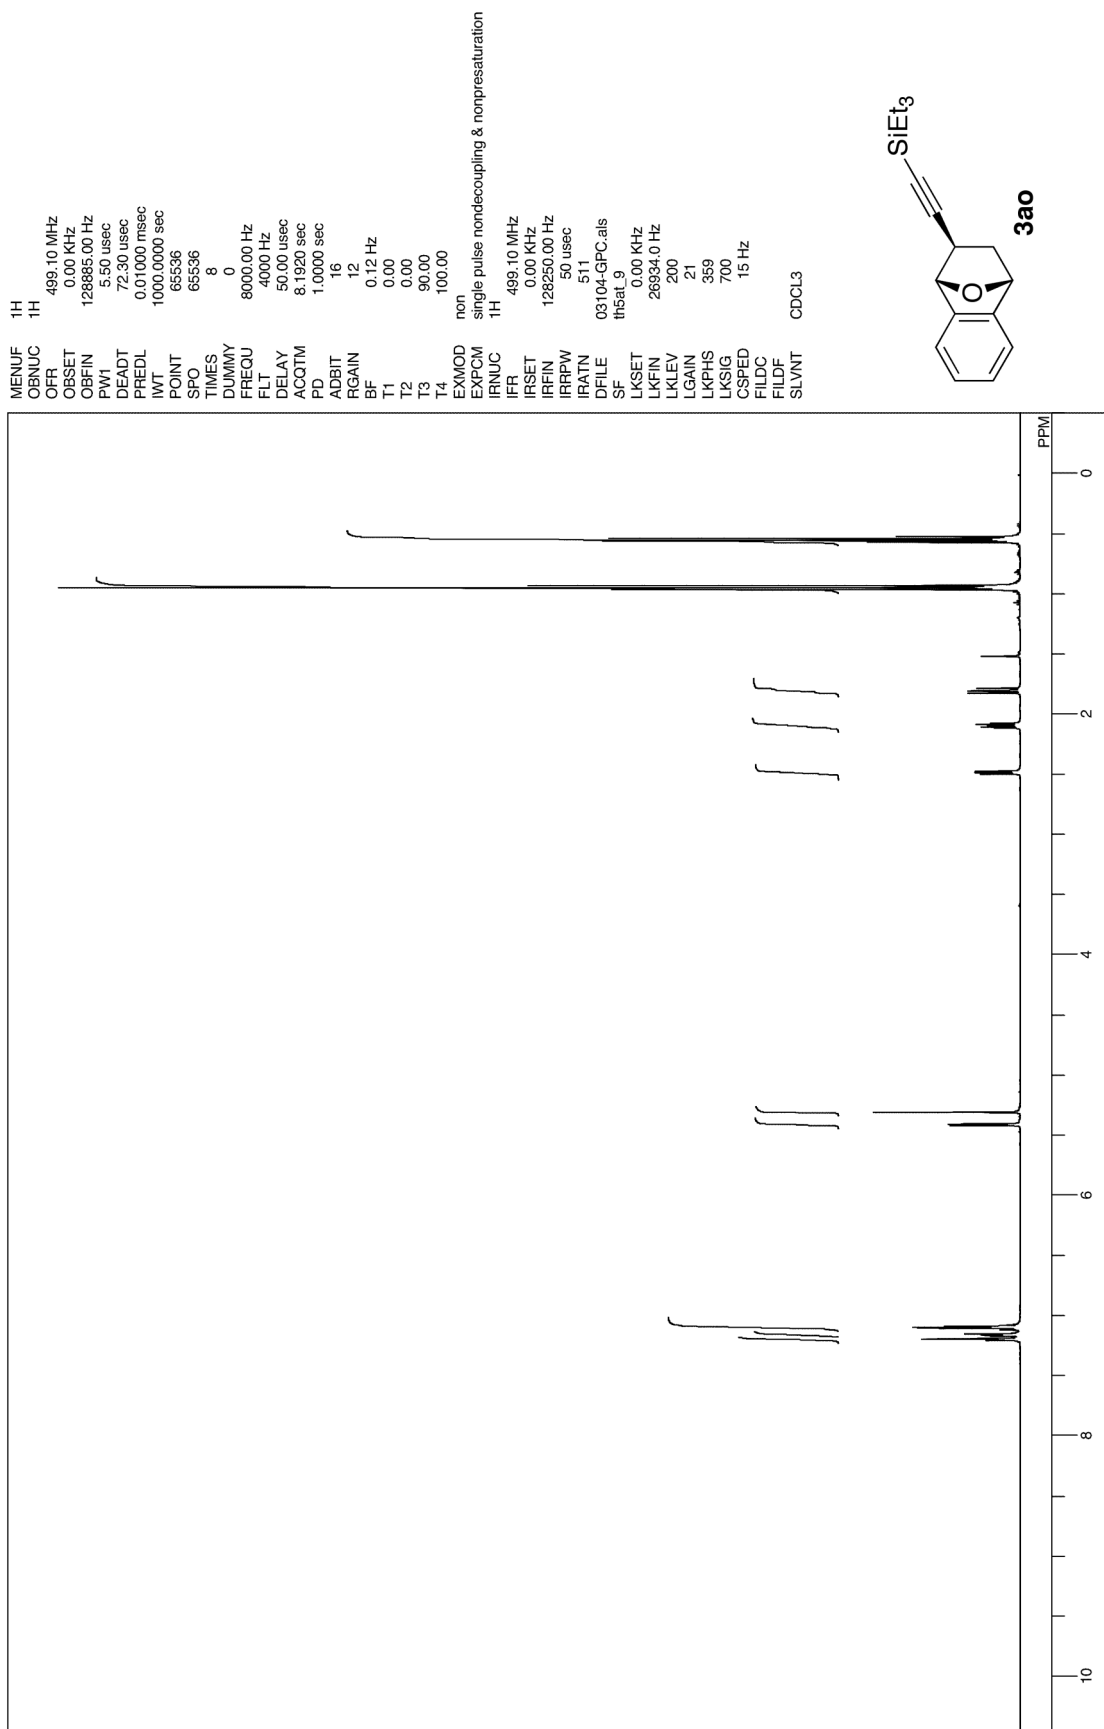

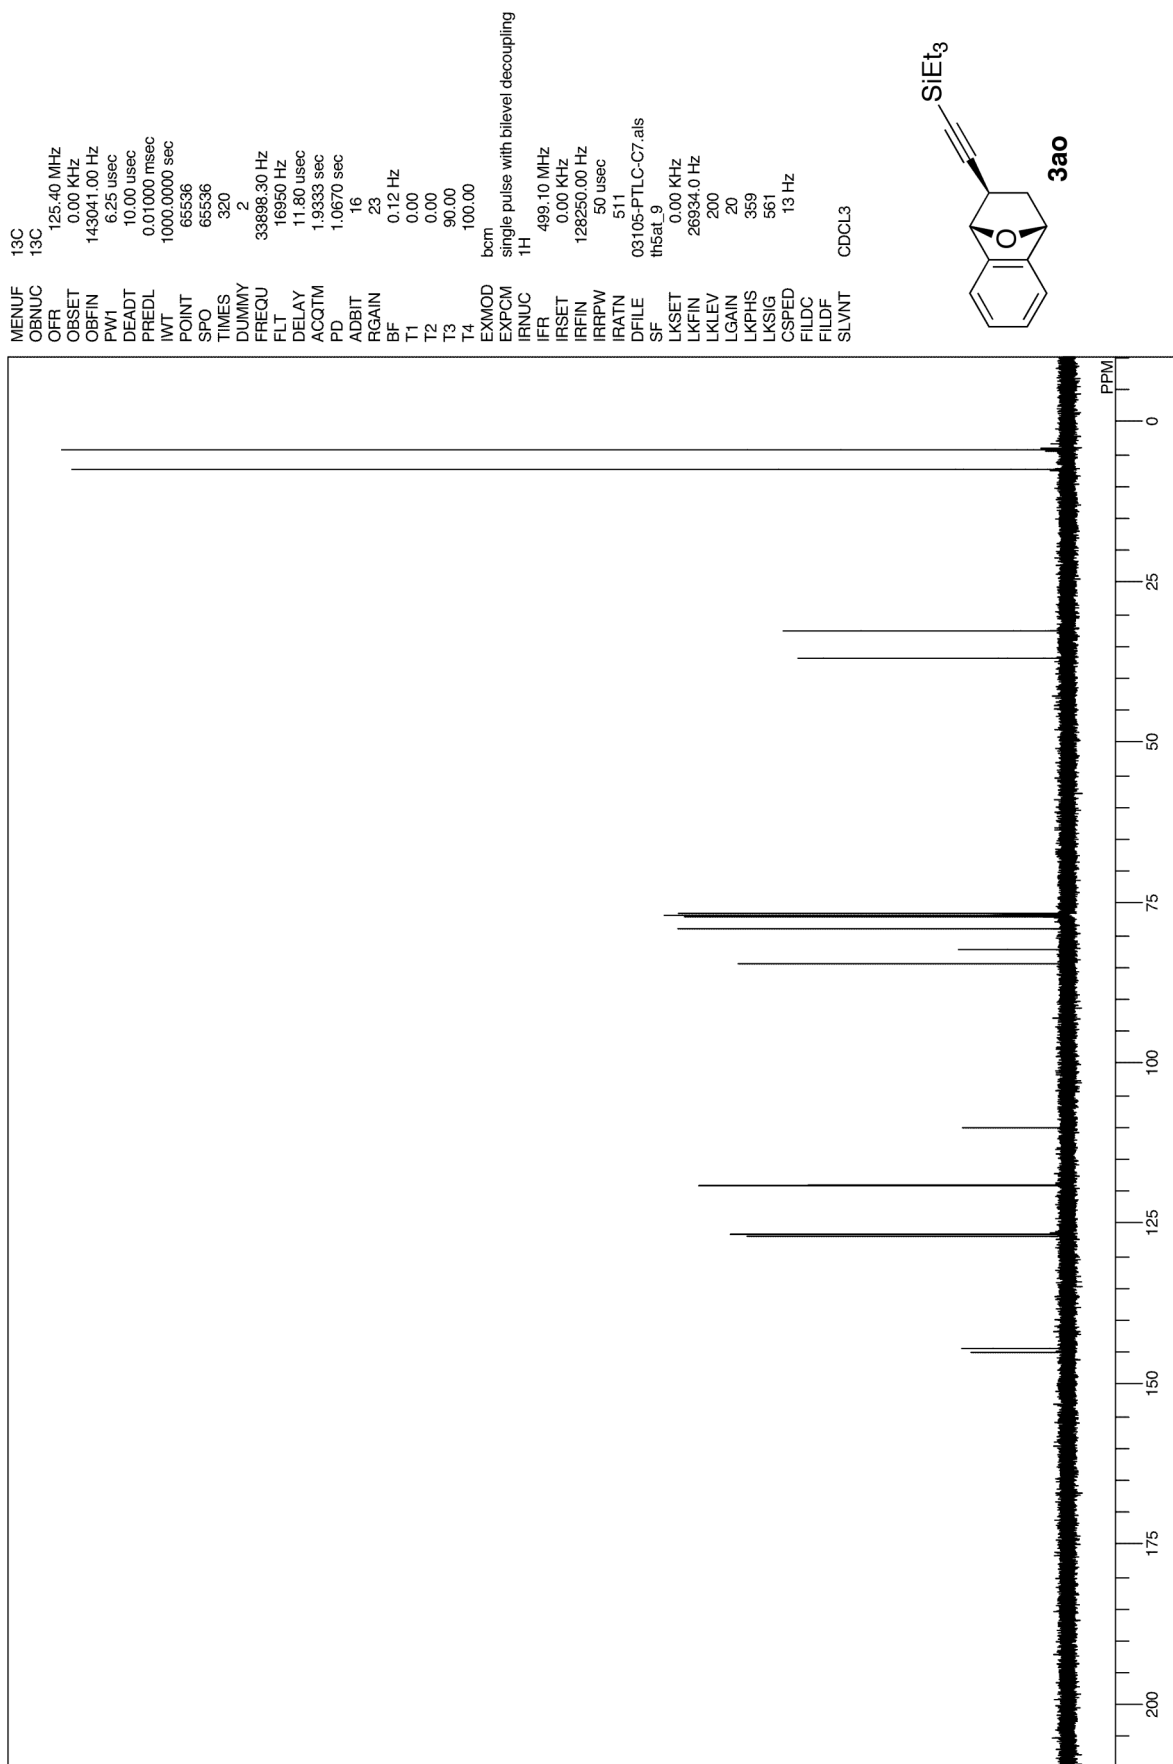

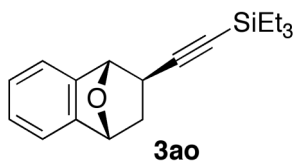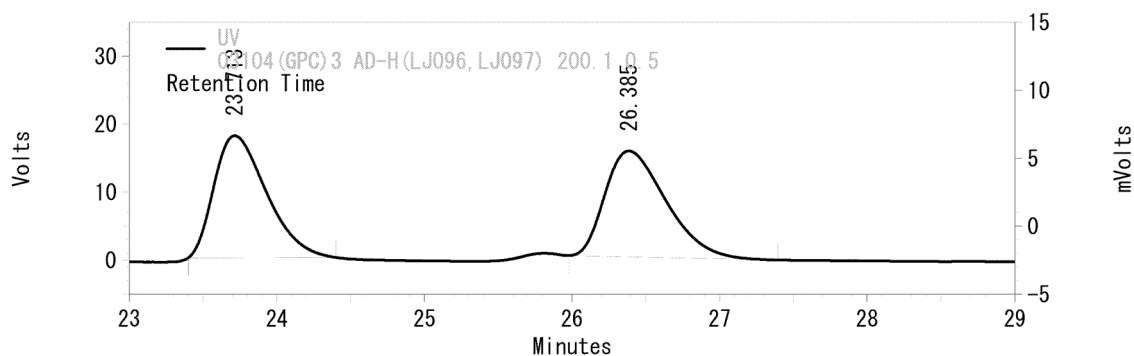

**UV Results**

| Pk #          | Retention Time | Area   | Area Percent | Height |
|---------------|----------------|--------|--------------|--------|
| 1             | 23.713         | 441989 | 49.796       | 17927  |
| 2             | 26.385         | 445606 | 50.204       | 15555  |
| <b>Totals</b> |                | 887595 | 100.000      | 33482  |

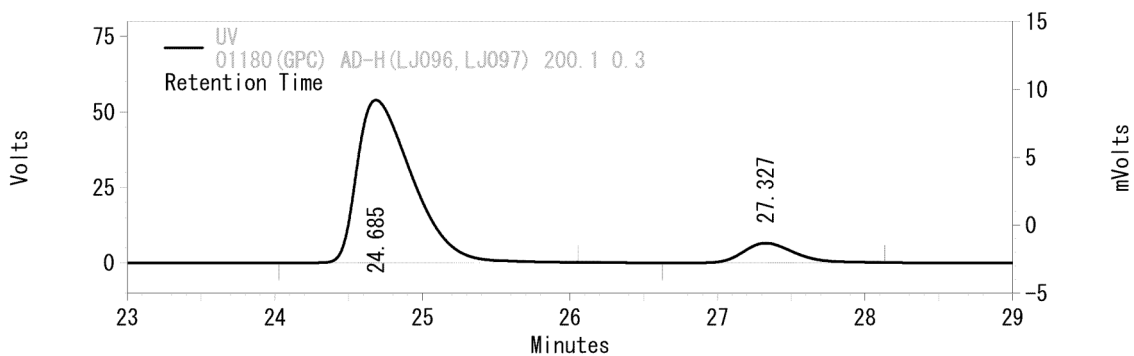

**UV Results**

| Pk #          | Retention Time | Area    | Area Percent | Height |
|---------------|----------------|---------|--------------|--------|
| 1             | 24.685         | 1387479 | 90.024       | 53802  |
| 2             | 27.327         | 153745  | 9.976        | 6485   |
| <b>Totals</b> |                | 1541224 | 100.000      | 60287  |



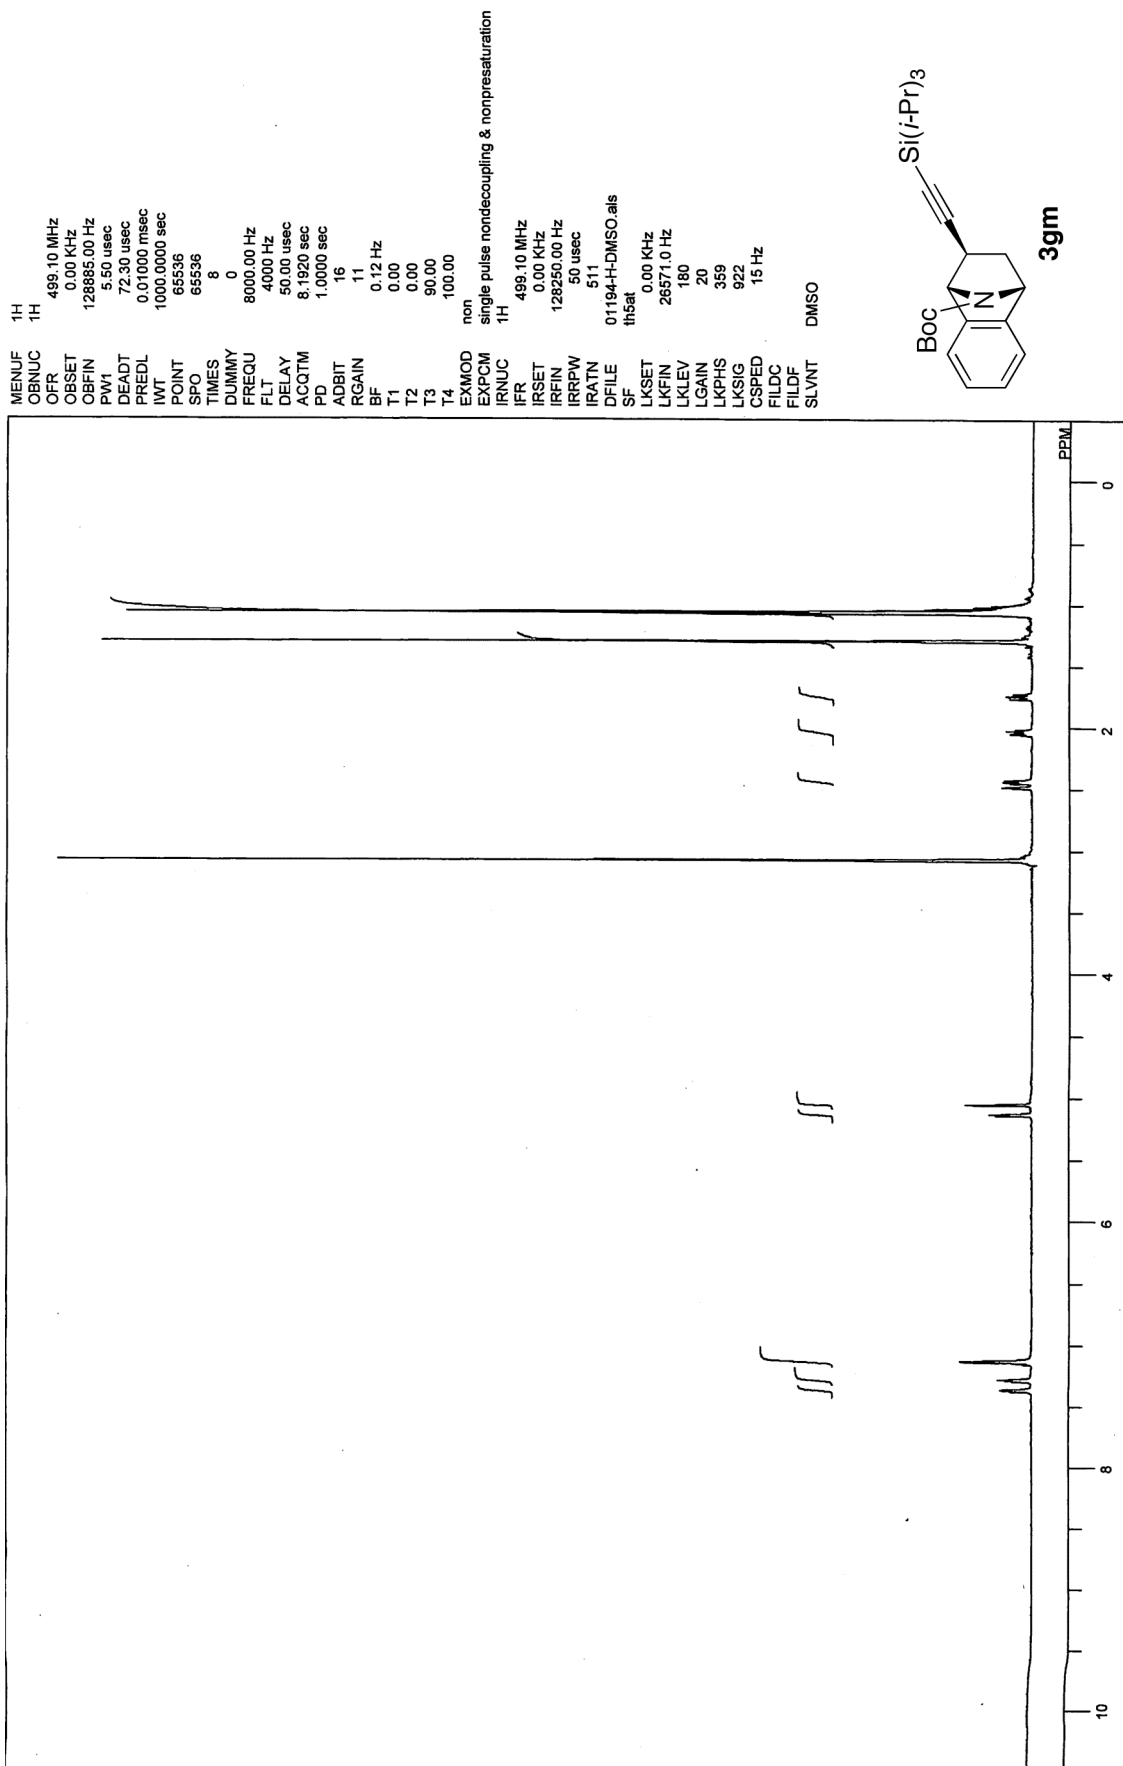

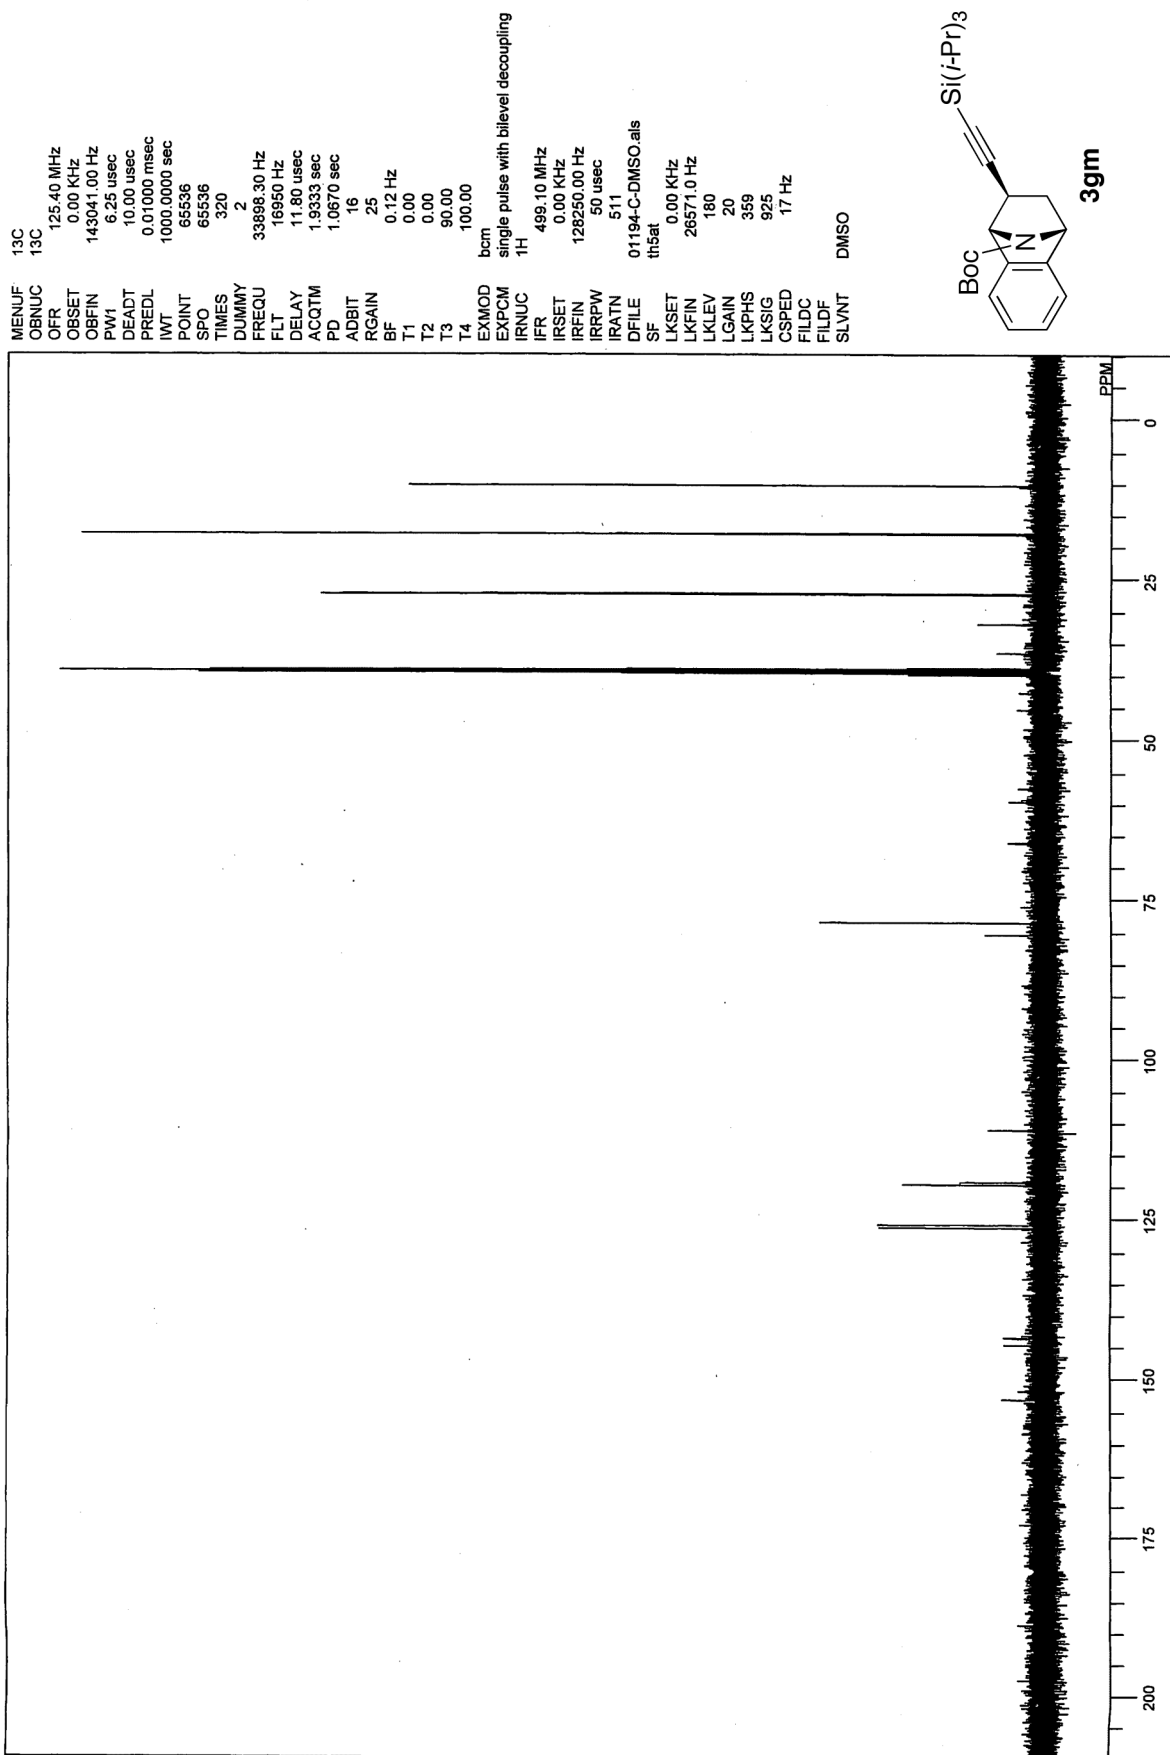

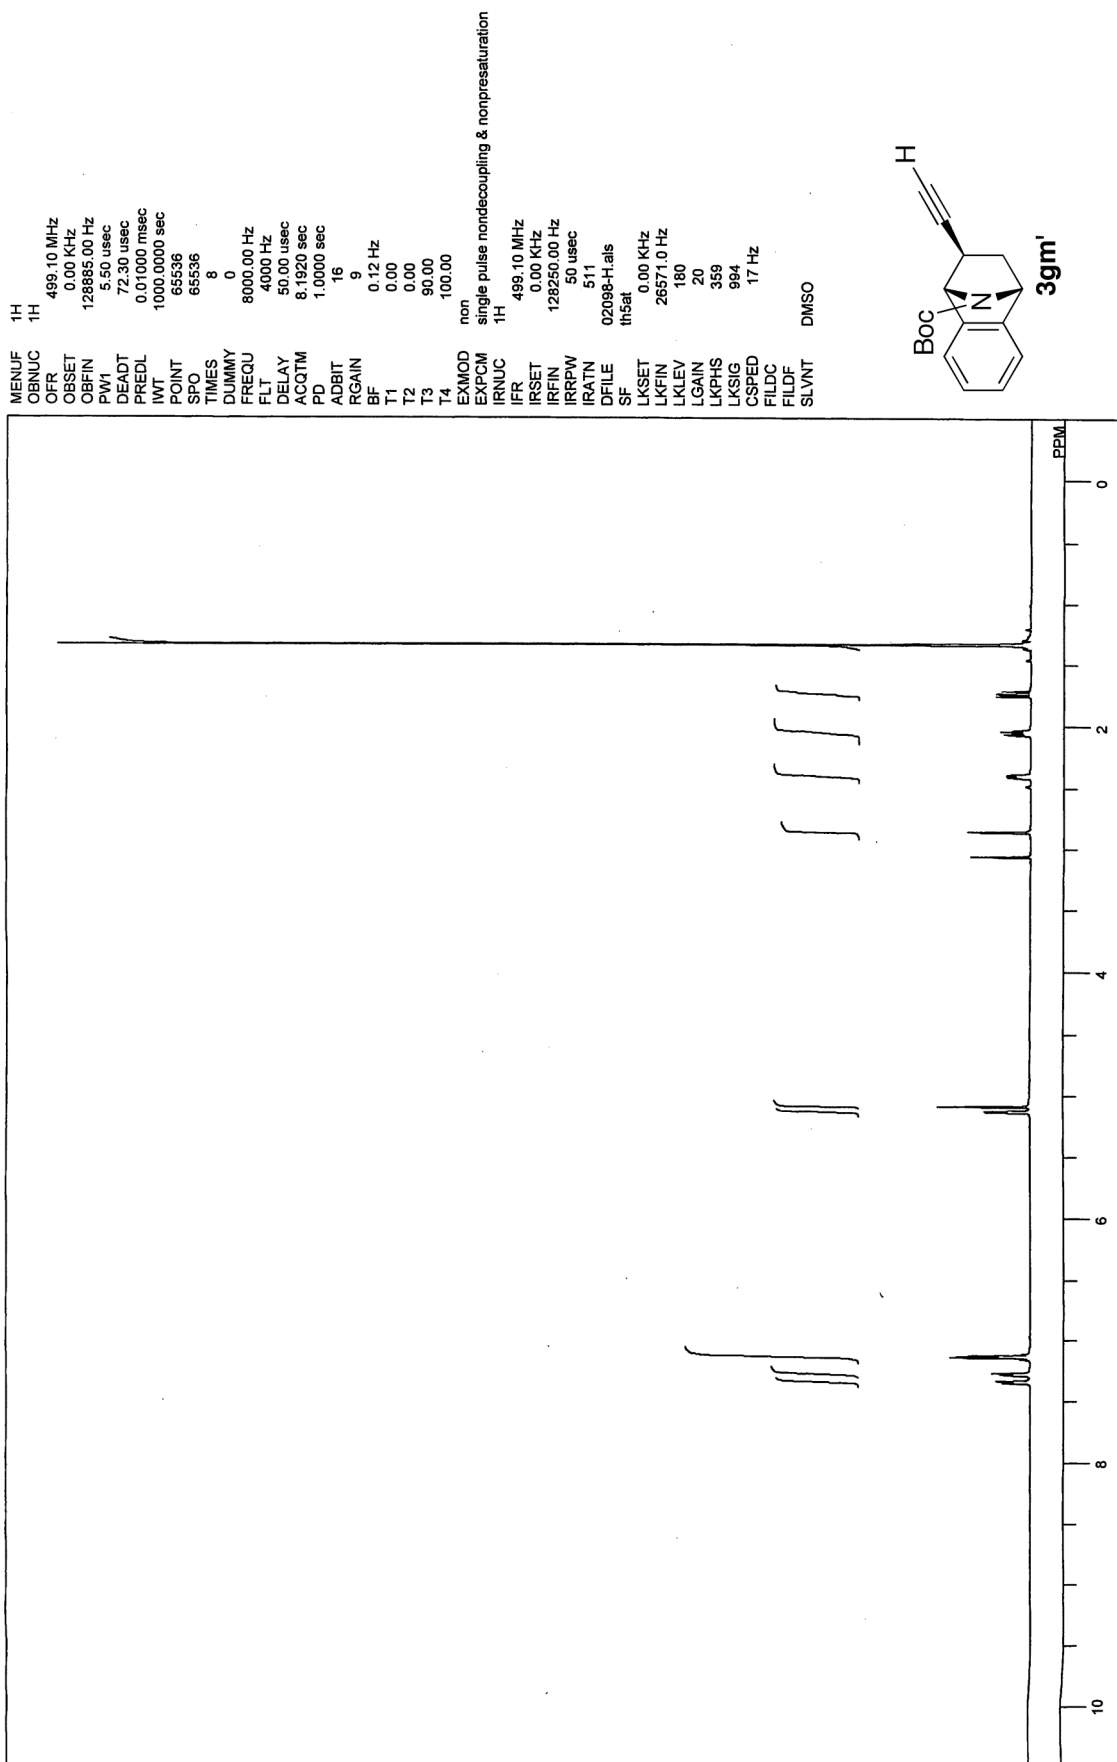

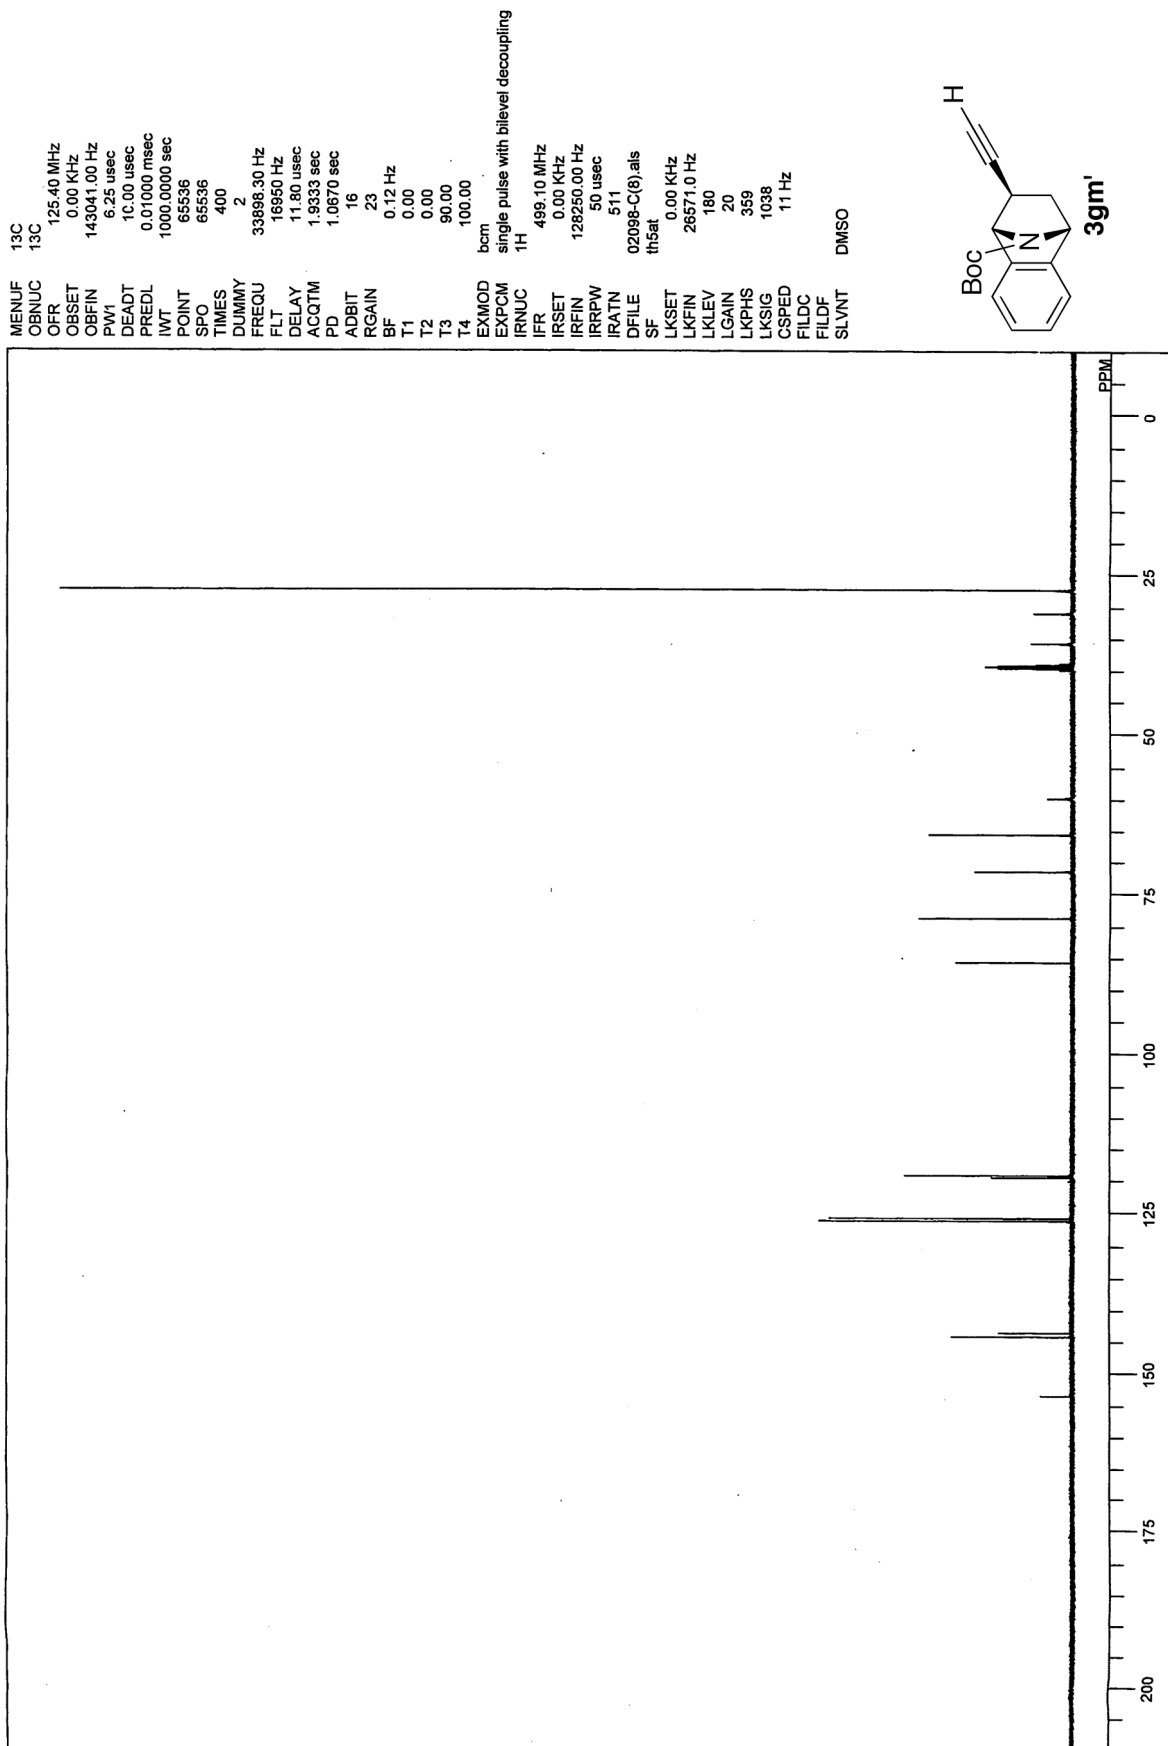

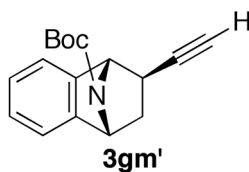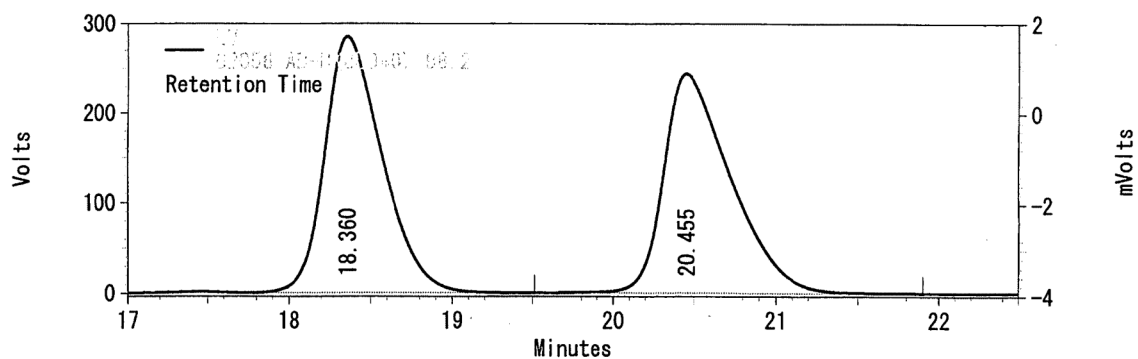

**UV Results**

| Pk #          | Retention Time | Area     | Area Percent | Height |
|---------------|----------------|----------|--------------|--------|
| 1             | 18.360         | 6901503  | 49.748       | 284622 |
| 2             | 20.455         | 6971408  | 50.252       | 243389 |
| <b>Totals</b> |                | 13872911 | 100.000      | 528011 |

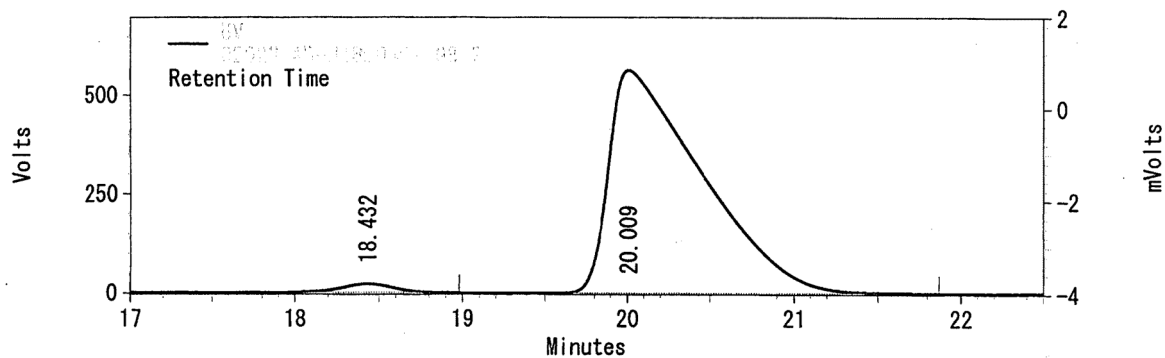

**UV Results**

| Pk #          | Retention Time | Area     | Area Percent | Height |
|---------------|----------------|----------|--------------|--------|
| 1             | 18.432         | 458939   | 2.058        | 21557  |
| 2             | 20.009         | 21841478 | 97.942       | 563329 |
| <b>Totals</b> |                | 22300417 | 100.000      | 584886 |

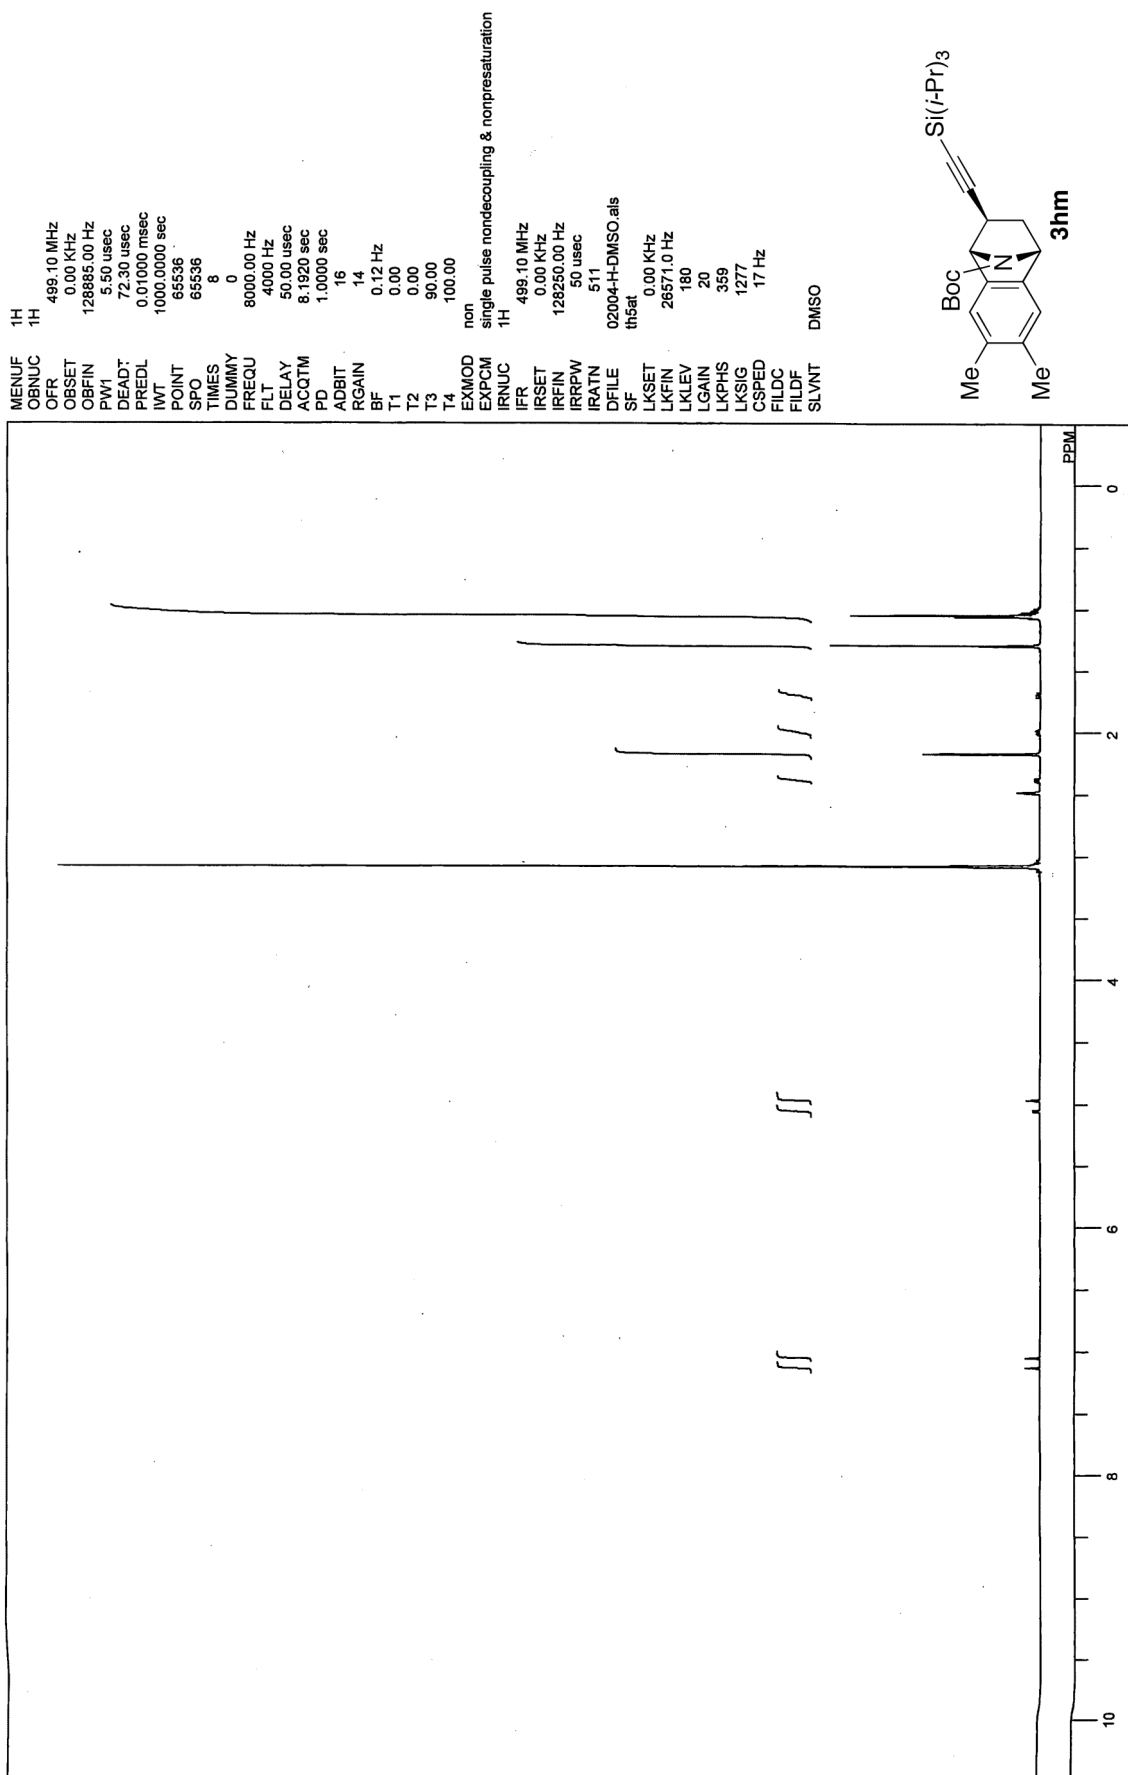

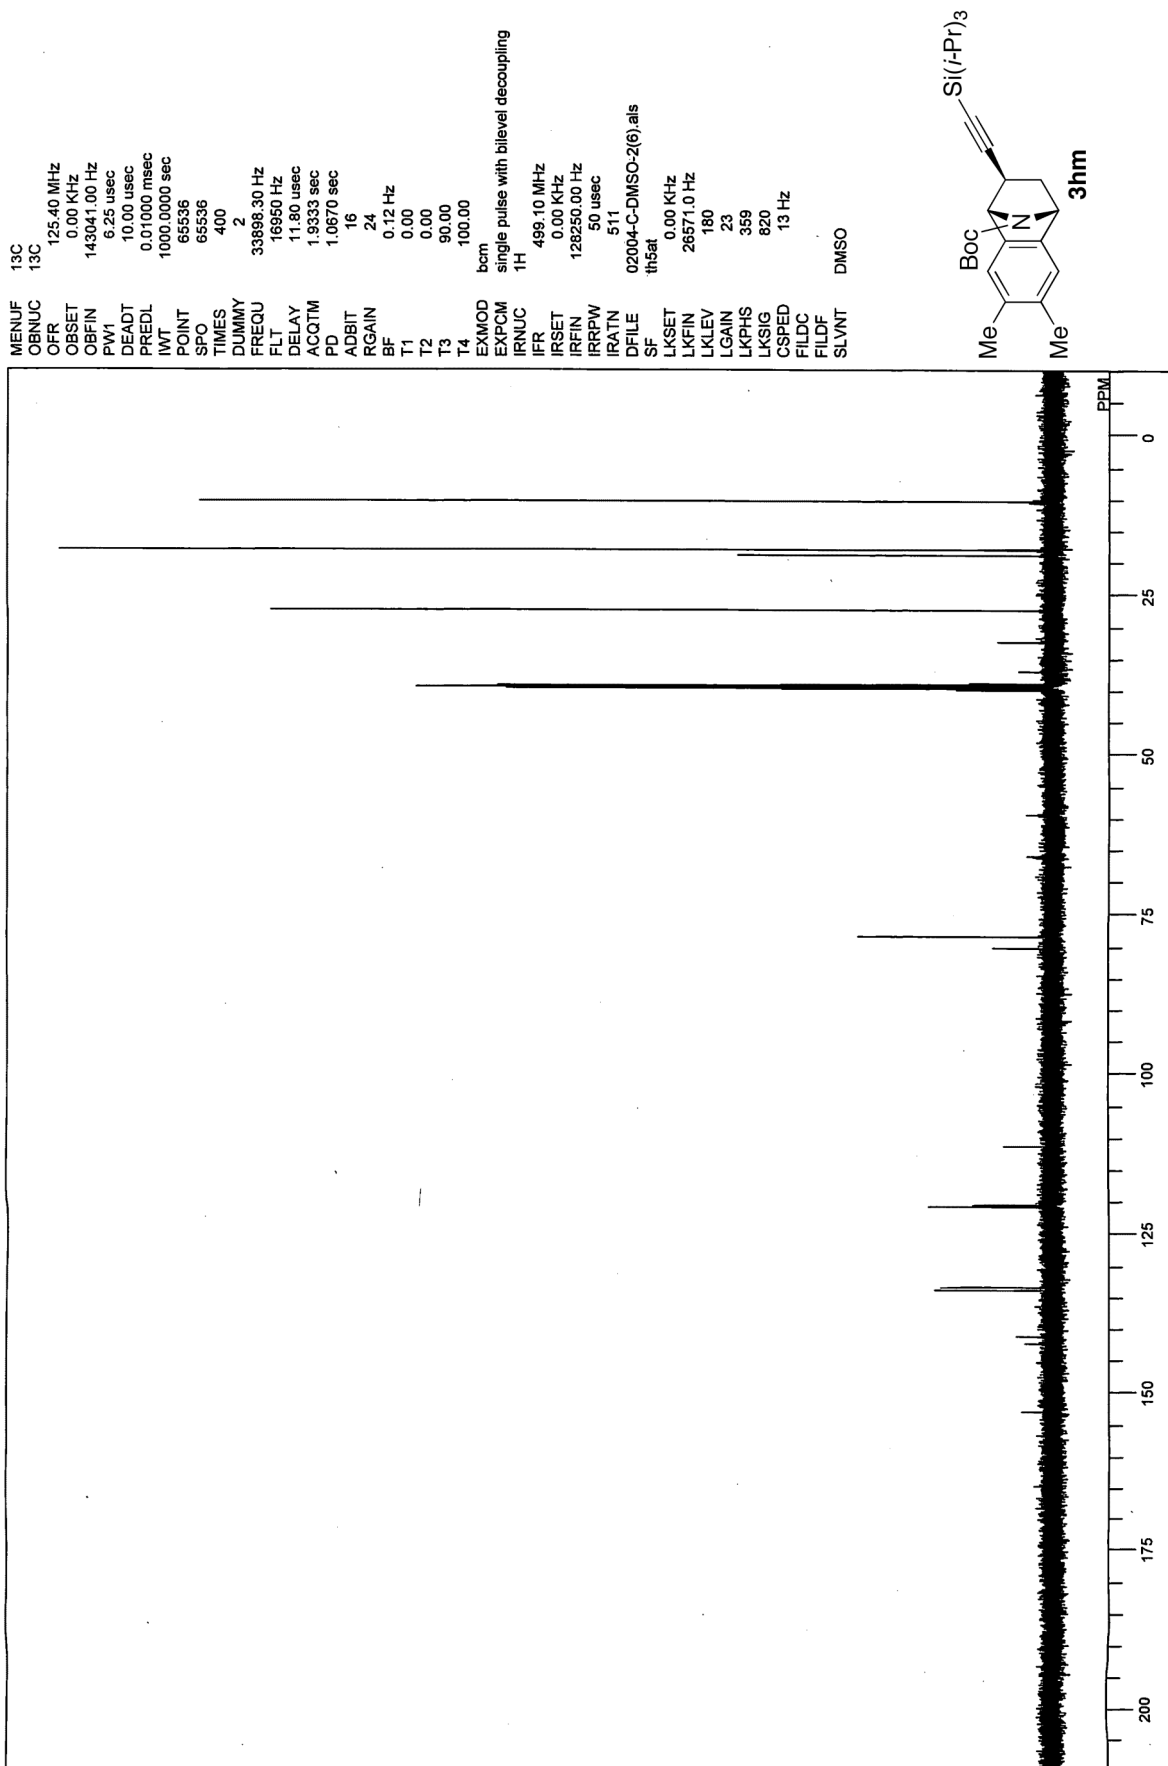

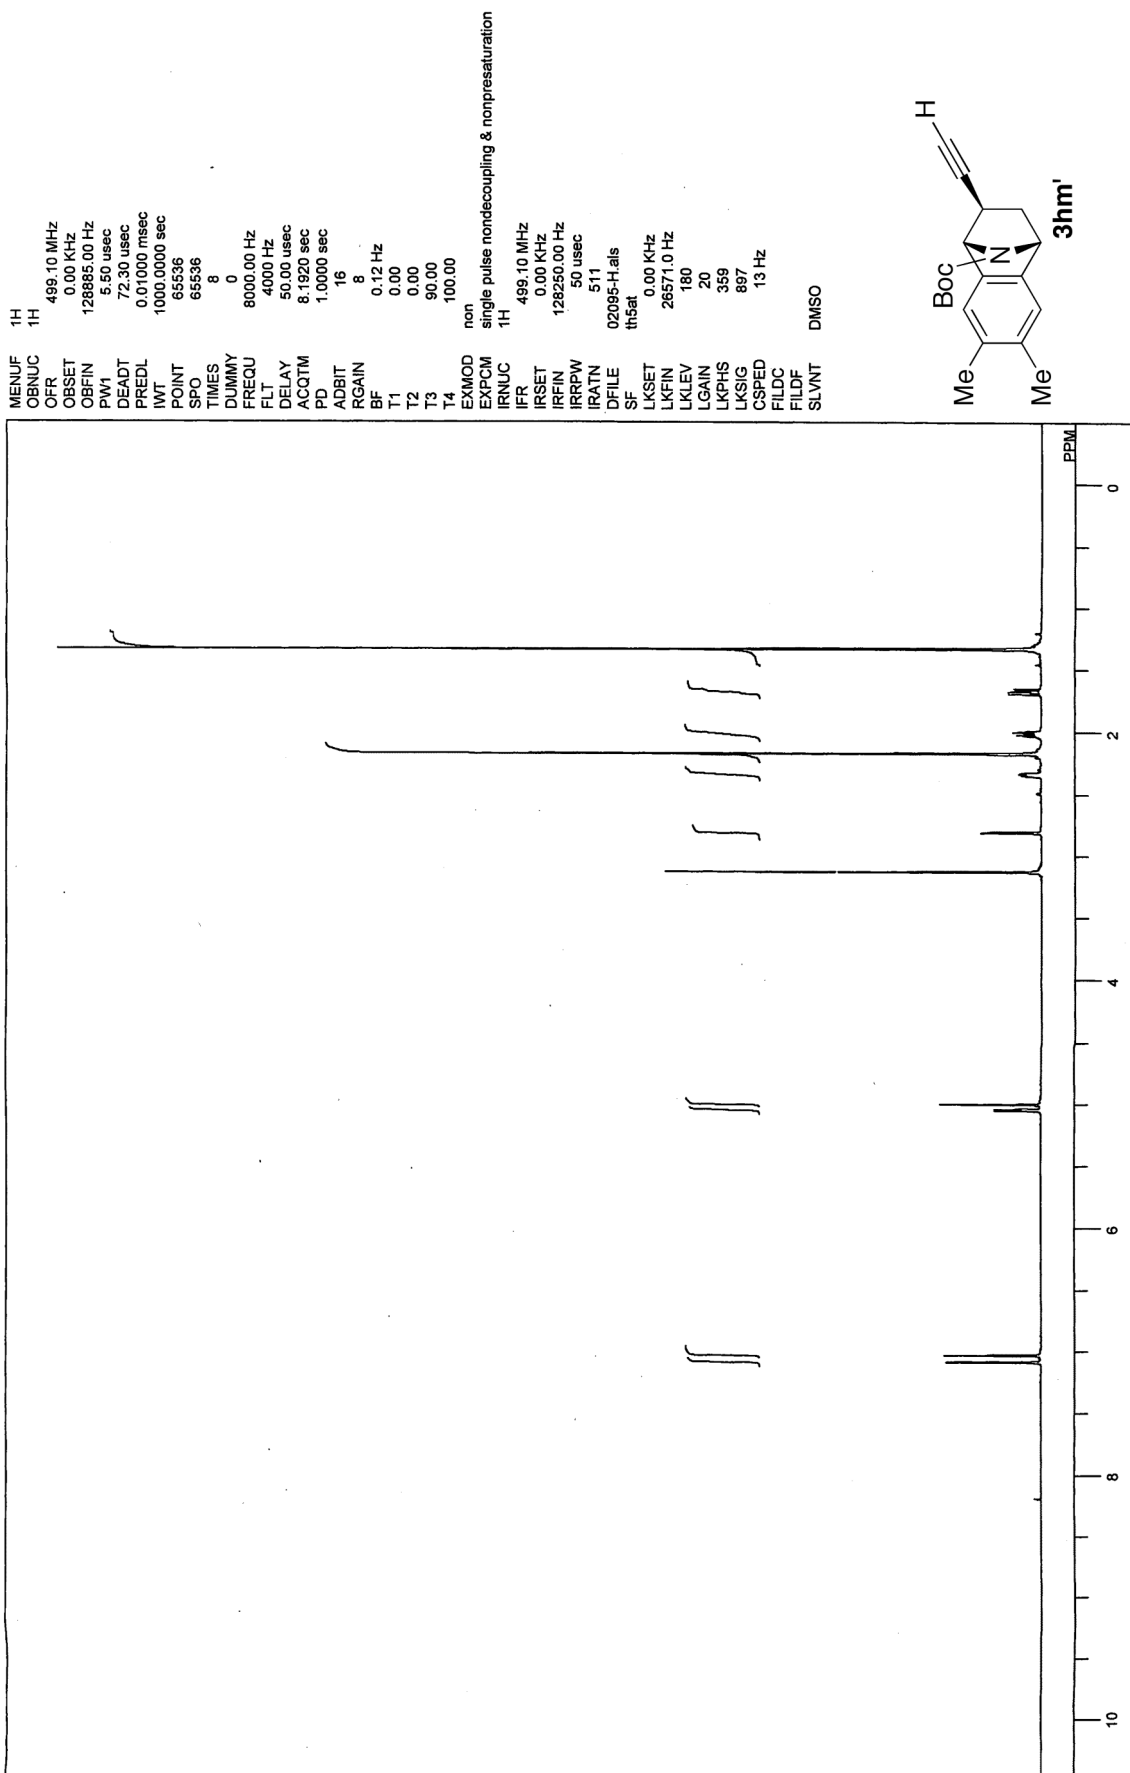



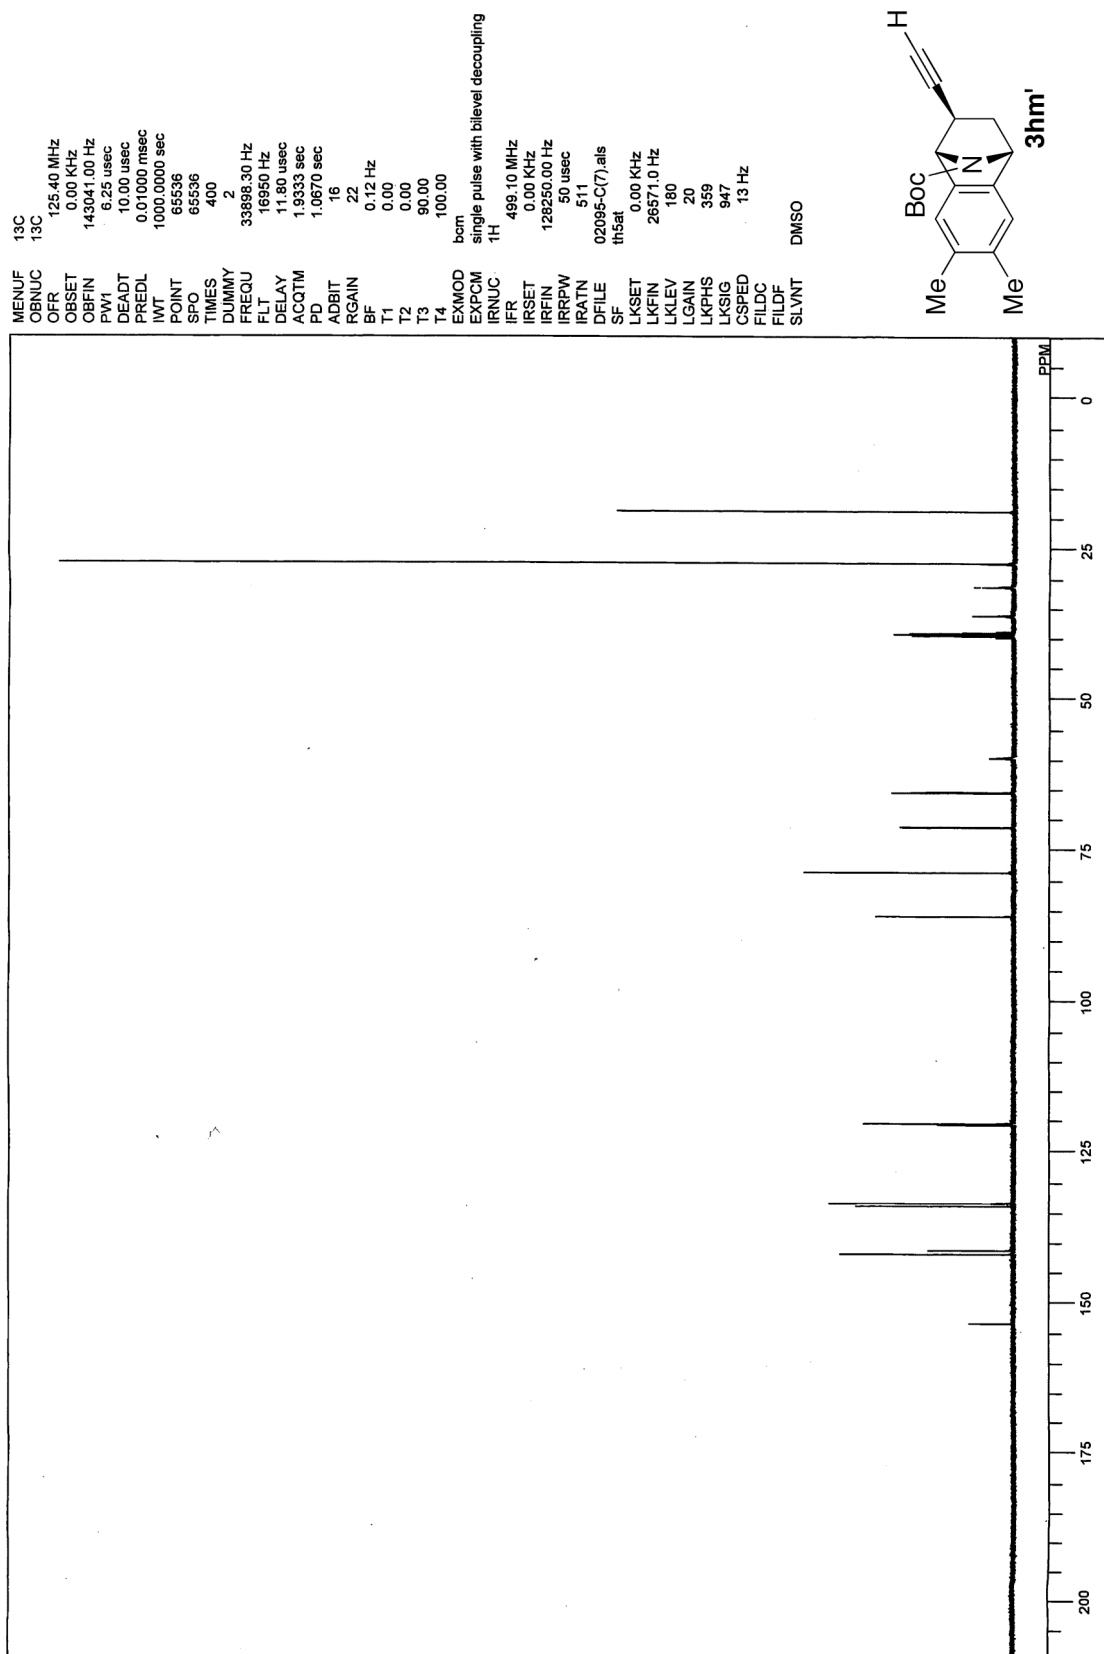

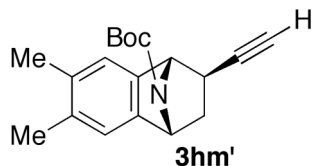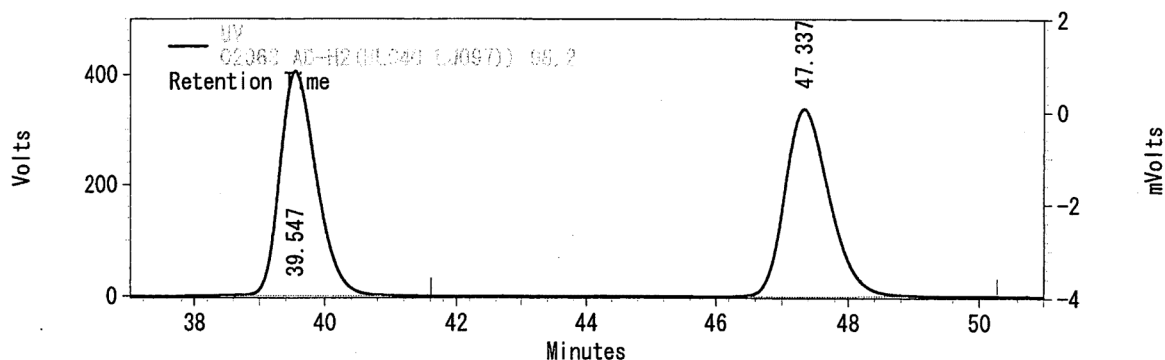

**UV Results**

| Pk #          | Retention Time | Area     | Area Percent | Height |
|---------------|----------------|----------|--------------|--------|
| 1             | 39.547         | 15758023 | 49.803       | 405459 |
| 2             | 47.337         | 15882642 | 50.197       | 338417 |
| <b>Totals</b> |                | 31640665 | 100.000      | 743876 |

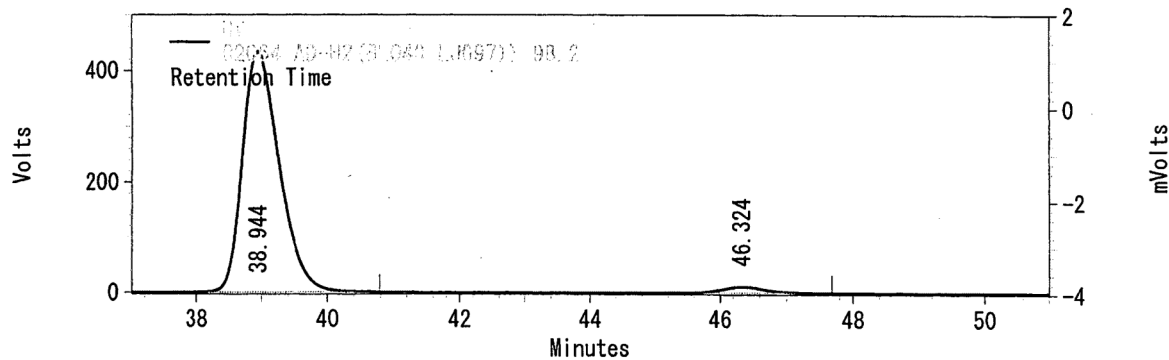

**UV Results**

| Pk #          | Retention Time | Area     | Area Percent | Height |
|---------------|----------------|----------|--------------|--------|
| 1             | 38.944         | 16916376 | 97.297       | 432575 |
| 2             | 46.324         | 469938   | 2.703        | 10644  |
| <b>Totals</b> |                | 17386314 | 100.000      | 443219 |

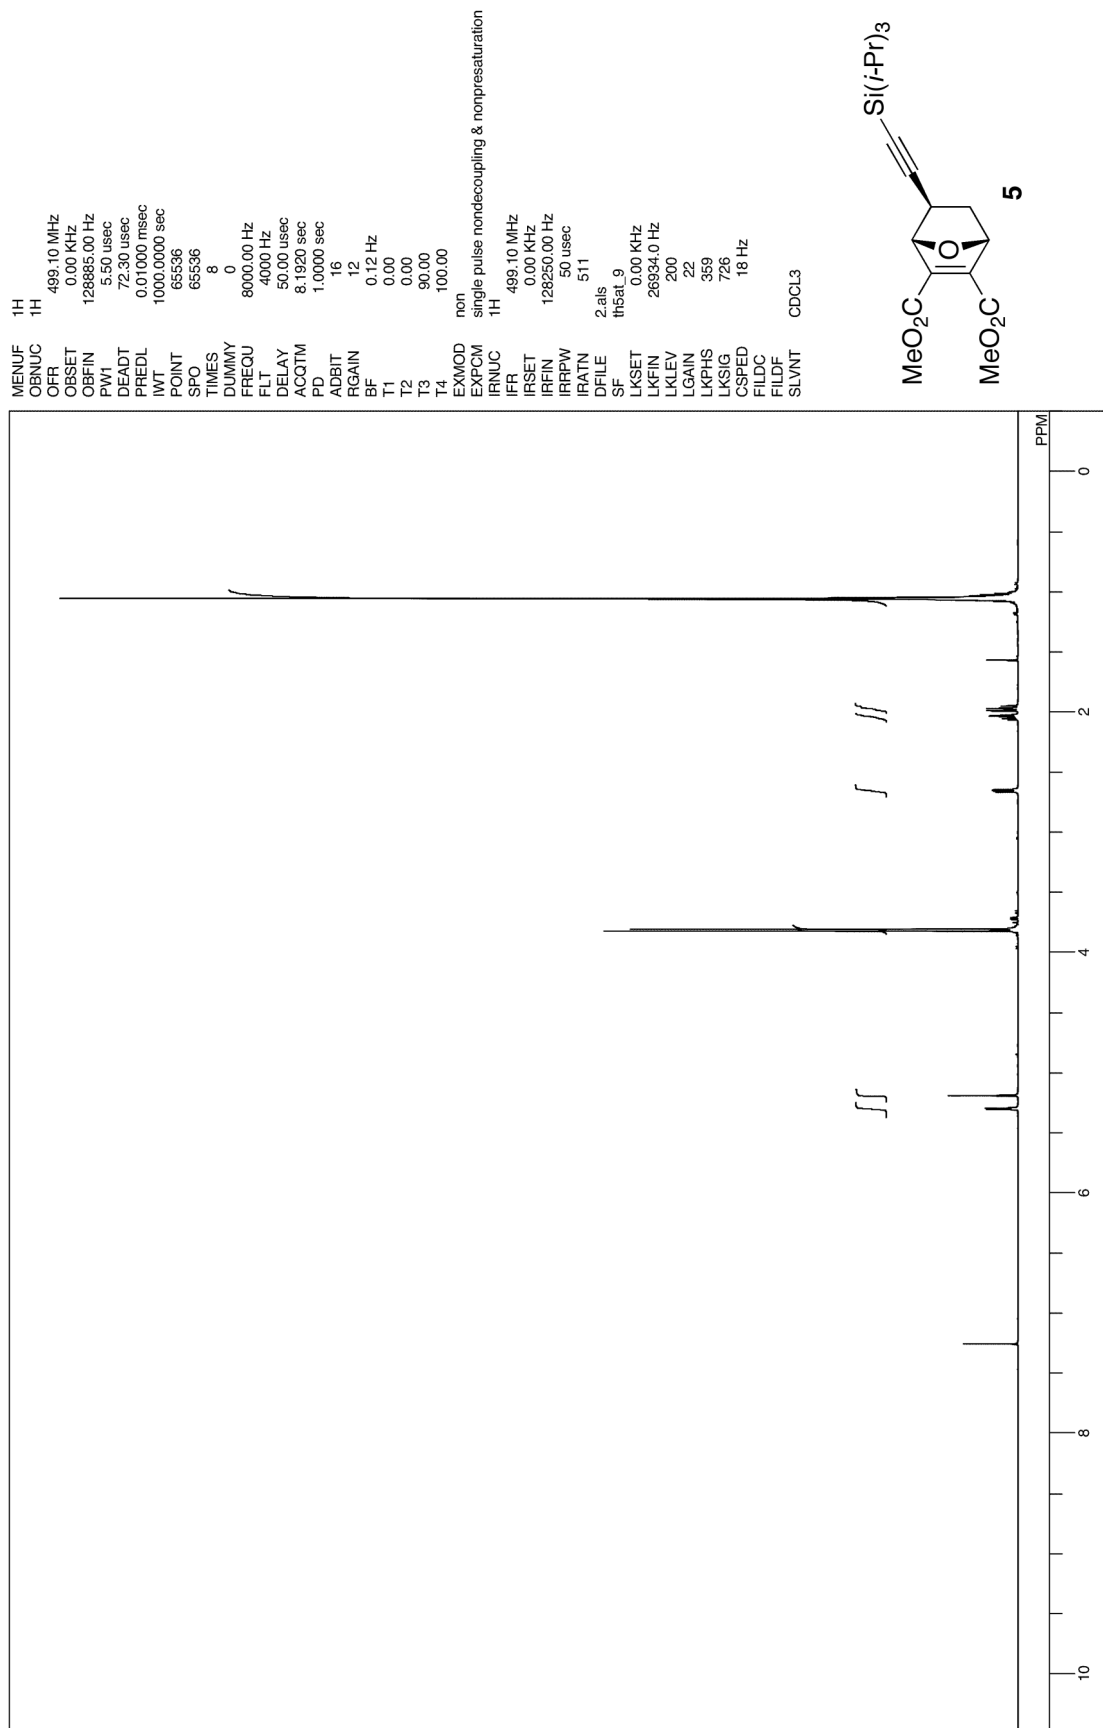

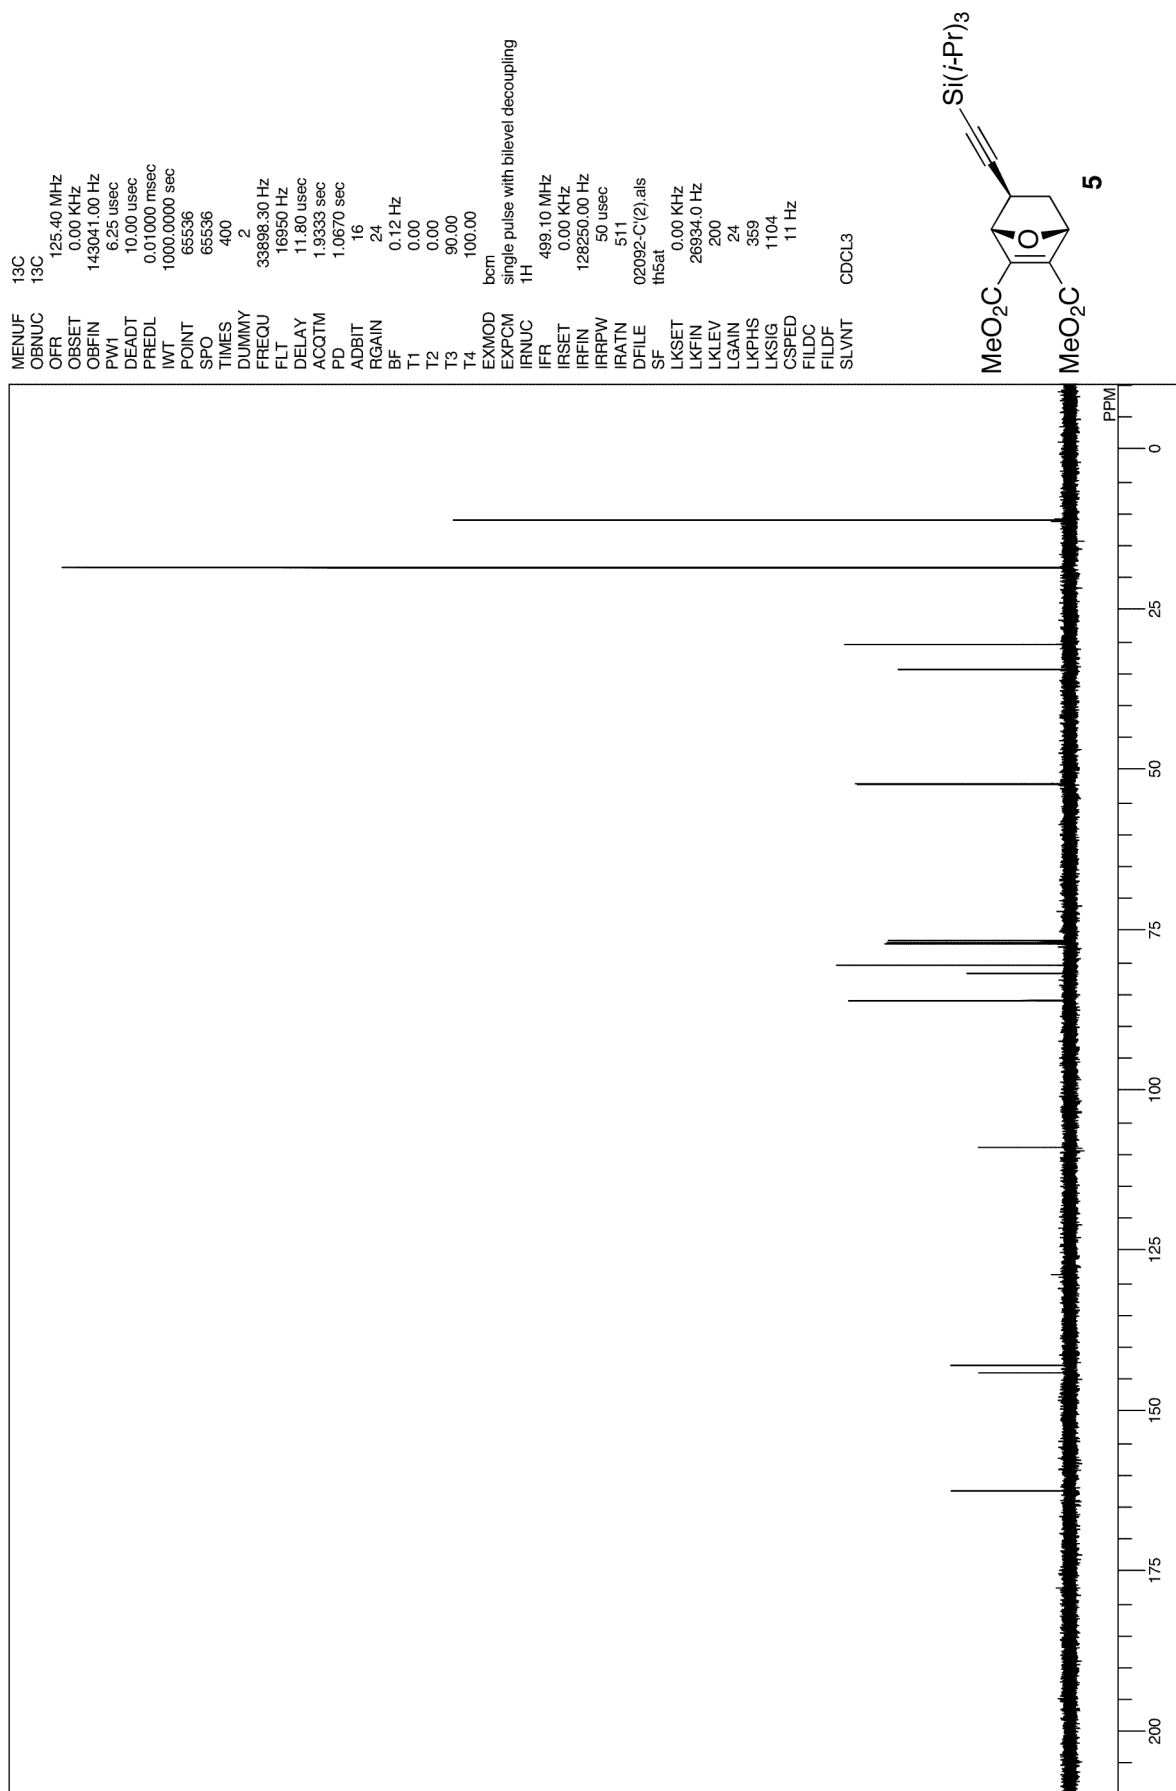

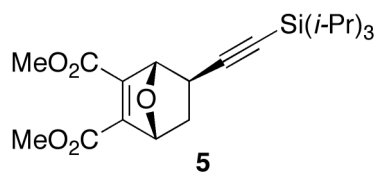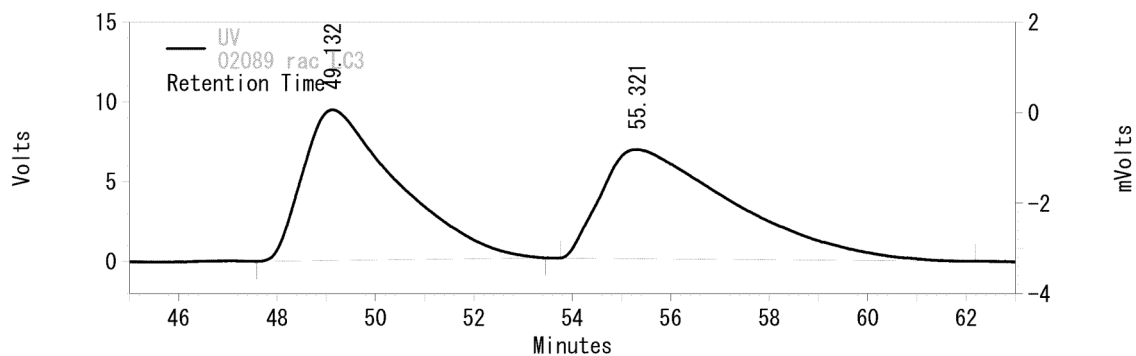

**UV Results**

| Pk #   | Retention Time | Area    | Area Percent | Height |
|--------|----------------|---------|--------------|--------|
| 1      | 49.132         | 1264739 | 49.875       | 9429   |
| 2      | 55.321         | 1271068 | 50.125       | 6832   |
| Totals |                | 2535807 | 100.000      | 16261  |

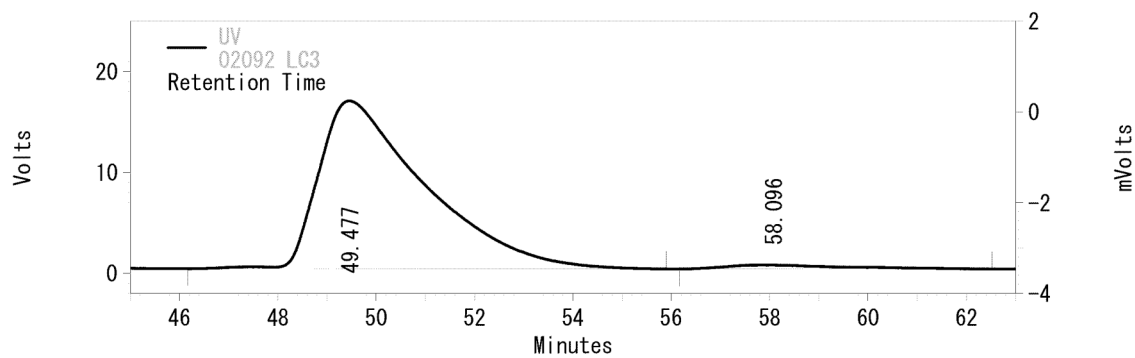

**UV Results**

| Pk #   | Retention Time | Area    | Area Percent | Height |
|--------|----------------|---------|--------------|--------|
| 1      | 49.477         | 2493568 | 97.399       | 16651  |
| 2      | 58.096         | 66584   | 2.601        | 398    |
| Totals |                | 2560152 | 100.000      | 17049  |

### Chiral HPLC charts for eqn 2

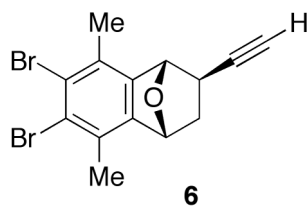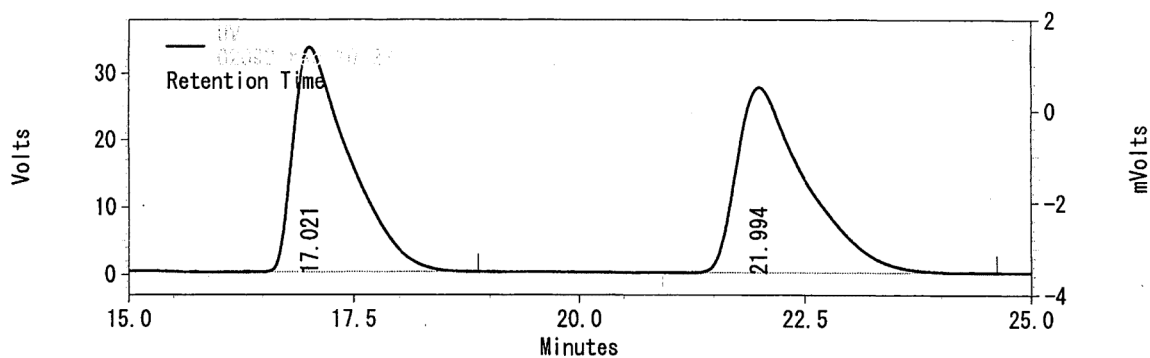

#### UV Results

| PK #          | Retention Time | Area           | Area Percent   | Height       |
|---------------|----------------|----------------|----------------|--------------|
| 1             | 17.021         | 1433486        | 49.883         | 33469        |
| 2             | 21.994         | 1440231        | 50.117         | 27586        |
| <b>Totals</b> |                | <b>2873717</b> | <b>100.000</b> | <b>61055</b> |

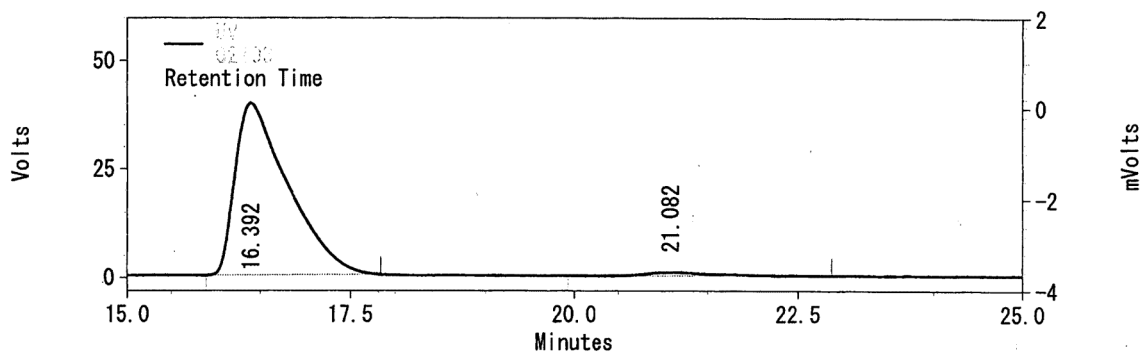

#### UV Results

| PK #          | Retention Time | Area           | Area Percent   | Height       |
|---------------|----------------|----------------|----------------|--------------|
| 1             | 16.392         | 1625589        | 97.731         | 39526        |
| 2             | 21.082         | 37735          | 2.269          | 781          |
| <b>Totals</b> |                | <b>1663324</b> | <b>100.000</b> | <b>40307</b> |
